# Supplementary material for: RAPID: A Rep-Seq Dataset Analysis Platform With an Integrated Antibody Database
Source: Front Immunol. 2021 Aug 13;12:717496. doi: 10.3389/fimmu.2021.717496 (PMC8414647; doi:10.3389/fimmu.2021.717496)
Supplement: Supplementary file 4 [file Table_2.xlsx]

## Sheet: Sheet1
Table S2 Metadata of 2,449 Rep-seq datasets
Run	Gender	Tissue	Amplification strategy	Status	Age	Read length	Sequencing platform	5'-primer location	3'-primer location	Isotype
DRR056252	Female	PBMC	RACE	Cryoglobulinemia	70	2×300	Illumina MiSeq	Unavailable	CH1	IGHG, None
DRR056253	Female	PBMC	RACE	Cryoglobulinemia	70	2×300	Illumina MiSeq	Unavailable	CH1	IGHG, None
DRR056254	Female	PBMC	RACE	Cryoglobulinemia	70	2×300	Illumina MiSeq	Unavailable	CH1	IGHG, None
ERR1760498	Unknown	PBMC	RACE	Healthy	Unknown	2×300	Illumina MiSeq	Unavailable	CH1	IGHM
ERR1812282	Male	Bone marrow	Multiplex	Allergic rhinitis	25	2×300	Illumina MiSeq	FR1	CH1	IGHM, IGHG, IGHA
ERR1812283	Male	Bone marrow	Multiplex	Allergic rhinitis	25	2×300	Illumina MiSeq	FR1	CH1	IGHM, IGHG, IGHA, IGHE
ERR1812284	Male	Bone marrow	Multiplex	Allergic rhinitis	37	2×300	Illumina MiSeq	FR1	CH1	IGHG, IGHM, IGHA, IGHE
ERR1812285	Male	Bone marrow	Multiplex	Allergic rhinitis	37	2×300	Illumina MiSeq	FR1	CH1	IGHM, IGHG, IGHA, IGHE
ERR1812286	Male	Bone marrow	Multiplex	Allergic rhinitis	28	2×300	Illumina MiSeq	FR1	CH1	IGHM, IGHG, IGHA
ERR1812287	Male	Bone marrow	Multiplex	Allergic rhinitis	28	2×300	Illumina MiSeq	FR1	CH1	IGHM, IGHG, IGHA
ERR1812288	Male	PBMC	Multiplex	Allergic rhinitis	25	2×300	Illumina MiSeq	FR1	CH1	IGHM, IGHA, IGHG
ERR1812289	Male	PBMC	Multiplex	Allergic rhinitis	25	2×300	Illumina MiSeq	FR1	CH1	IGHM, IGHA, IGHG
ERR1812290	Male	PBMC	Multiplex	Allergic rhinitis	37	2×300	Illumina MiSeq	FR1	CH1	IGHM, IGHA, IGHG
ERR1812291	Male	PBMC	Multiplex	Allergic rhinitis	37	2×300	Illumina MiSeq	FR1	CH1	IGHM, IGHA, IGHG
ERR1812292	Male	PBMC	Multiplex	Allergic rhinitis	28	2×300	Illumina MiSeq	FR1	CH1	IGHM, IGHA, IGHG
ERR1812293	Male	PBMC	Multiplex	Allergic rhinitis	28	2×300	Illumina MiSeq	FR1	CH1	IGHM, IGHA, IGHG
ERR1812294	Male	Bone marrow	Multiplex	Allergic rhinitis	25	2×300	Illumina MiSeq	FR1	CH1	IGHM, IGHG, IGHA, IGHE
ERR1812295	Male	Bone marrow	Multiplex	Allergic rhinitis	25	2×300	Illumina MiSeq	FR1	CH1	IGHM, IGHG, IGHA, IGHE
ERR1812296	Male	Bone marrow	Multiplex	Allergic rhinitis	26	2×300	Illumina MiSeq	FR1	CH1	IGHM, IGHG, IGHA, IGHE
ERR1812297	Male	Bone marrow	Multiplex	Allergic rhinitis	26	2×300	Illumina MiSeq	FR1	CH1	IGHM, IGHG, IGHA, IGHE
ERR1812298	Male	Bone marrow	Multiplex	Allergic rhinitis	26	2×300	Illumina MiSeq	FR1	CH1	IGHM, IGHA, IGHG
ERR1812299	Male	Bone marrow	Multiplex	Allergic rhinitis	26	2×300	Illumina MiSeq	FR1	CH1	IGHM, IGHG, IGHA
ERR1812300	Male	PBMC	Multiplex	Allergic rhinitis	25	2×300	Illumina MiSeq	FR1	CH1	IGHM, IGHA, IGHG
ERR1812301	Male	PBMC	Multiplex	Allergic rhinitis	25	2×300	Illumina MiSeq	FR1	CH1	IGHM, IGHG, IGHA
ERR1812302	Male	PBMC	Multiplex	Allergic rhinitis	26	2×300	Illumina MiSeq	FR1	CH1	IGHM, IGHA, IGHG
ERR1812303	Male	PBMC	Multiplex	Allergic rhinitis	26	2×300	Illumina MiSeq	FR1	CH1	IGHM, IGHA, IGHG
ERR1812304	Male	PBMC	Multiplex	Allergic rhinitis	26	2×300	Illumina MiSeq	FR1	CH1	IGHM, IGHA, IGHG
ERR1812305	Male	PBMC	Multiplex	Allergic rhinitis	26	2×300	Illumina MiSeq	FR1	CH1	IGHM, IGHA, IGHG
ERR2567178	Unknown	PBMC	RACE	Healthy	Unknown	325+275	Illumina MiSeq	Unavailable	CH1	IGHM, IGHD
ERR2567179	Unknown	PBMC	RACE	Unknown	Unknown	325+275	Illumina MiSeq	Unavailable	CH1	IGHM, IGHD
ERR2567180	Unknown	PBMC	RACE	Unknown	Unknown	325+275	Illumina MiSeq	Unavailable	CH1	IGHM, IGHD
ERR2567181	Unknown	PBMC	RACE	Unknown	Unknown	325+275	Illumina MiSeq	Unavailable	CH1	IGHM, IGHD
ERR2567182	Unknown	PBMC	RACE	Healthy	Unknown	325+275	Illumina MiSeq	Unavailable	CH1	IGHM, IGHD
ERR2567183	Unknown	PBMC	RACE	Healthy	Unknown	325+275	Illumina MiSeq	Unavailable	CH1	IGHM, IGHD
ERR2567184	Unknown	PBMC	RACE	Celiac disease	Unknown	325+275	Illumina MiSeq	Unavailable	CH1	IGHM, IGHD
ERR2567185	Unknown	PBMC	RACE	Unknown	Unknown	325+275	Illumina MiSeq	Unavailable	CH1	IGHM, IGHD
ERR2567186	Unknown	PBMC	RACE	Unknown	Unknown	325+275	Illumina MiSeq	Unavailable	CH1	IGHM, IGHD
ERR2567187	Unknown	PBMC	RACE	Unknown	Unknown	325+275	Illumina MiSeq	Unavailable	CH1	IGHM, IGHD
ERR2567188	Unknown	PBMC	RACE	Unknown	Unknown	325+275	Illumina MiSeq	Unavailable	CH1	IGHM, IGHD
ERR2567189	Unknown	PBMC	RACE	Unknown	Unknown	325+275	Illumina MiSeq	Unavailable	CH1	IGHM, IGHD
ERR2567190	Unknown	PBMC	RACE	Unknown	Unknown	325+275	Illumina MiSeq	Unavailable	CH1	IGHM, IGHD
ERR2567191	Unknown	PBMC	RACE	Unknown	Unknown	325+275	Illumina MiSeq	Unavailable	CH1	IGHM, IGHD
ERR2567192	Unknown	PBMC	RACE	Unknown	Unknown	325+275	Illumina MiSeq	Unavailable	CH1	IGHM, IGHD
ERR2567193	Unknown	PBMC	RACE	Celiac disease	Unknown	325+275	Illumina MiSeq	Unavailable	CH1	IGHM, IGHD
ERR2567194	Unknown	PBMC	RACE	Healthy	Unknown	325+275	Illumina MiSeq	Unavailable	CH1	IGHM, IGHD
ERR2567195	Unknown	PBMC	RACE	Celiac disease	Unknown	325+275	Illumina MiSeq	Unavailable	CH1	IGHM, IGHD
ERR2567197	Unknown	PBMC	RACE	Celiac disease	Unknown	325+275	Illumina MiSeq	Unavailable	CH1	IGHM, IGHD
ERR2567198	Unknown	PBMC	RACE	Celiac disease	Unknown	325+275	Illumina MiSeq	Unavailable	CH1	IGHM, IGHD
ERR2567199	Unknown	PBMC	RACE	Unknown	Unknown	325+275	Illumina MiSeq	Unavailable	CH1	IGHM, IGHD
ERR2567200	Unknown	PBMC	RACE	Unknown	Unknown	325+275	Illumina MiSeq	Unavailable	CH1	IGHM, IGHD
ERR2567201	Unknown	PBMC	RACE	Celiac disease	Unknown	325+275	Illumina MiSeq	Unavailable	CH1	IGHM, IGHD
ERR2567202	Unknown	PBMC	RACE	Unknown	Unknown	325+275	Illumina MiSeq	Unavailable	CH1	IGHM, IGHD
ERR2567203	Unknown	PBMC	RACE	Unknown	Unknown	325+275	Illumina MiSeq	Unavailable	CH1	IGHM, IGHD
ERR2567204	Unknown	PBMC	RACE	Unknown	Unknown	325+275	Illumina MiSeq	Unavailable	CH1	IGHM, IGHD
ERR2567205	Unknown	PBMC	RACE	Unknown	Unknown	325+275	Illumina MiSeq	Unavailable	CH1	IGHM, IGHD
ERR2567206	Unknown	PBMC	RACE	Healthy	Unknown	325+275	Illumina MiSeq	Unavailable	CH1	IGHM, IGHD
ERR2567207	Unknown	PBMC	RACE	Healthy	Unknown	325+275	Illumina MiSeq	Unavailable	CH1	IGHM, IGHD
ERR2567208	Unknown	PBMC	RACE	Unknown	Unknown	325+275	Illumina MiSeq	Unavailable	CH1	IGHM, IGHD
ERR2567209	Unknown	PBMC	RACE	Healthy	Unknown	325+275	Illumina MiSeq	Unavailable	CH1	IGHM, IGHD
ERR2567210	Unknown	PBMC	RACE	Unknown	Unknown	325+275	Illumina MiSeq	Unavailable	CH1	IGHM, IGHD
ERR2567211	Unknown	PBMC	RACE	Healthy	Unknown	325+275	Illumina MiSeq	Unavailable	CH1	IGHM, IGHD
ERR2567212	Unknown	PBMC	RACE	Unknown	Unknown	325+275	Illumina MiSeq	Unavailable	CH1	IGHM, IGHD
ERR2567213	Unknown	PBMC	RACE	Unknown	Unknown	325+275	Illumina MiSeq	Unavailable	CH1	IGHM, IGHD
ERR2567214	Unknown	PBMC	RACE	Healthy	Unknown	325+275	Illumina MiSeq	Unavailable	CH1	IGHM, IGHD
ERR2567215	Unknown	PBMC	RACE	Unknown	Unknown	325+275	Illumina MiSeq	Unavailable	CH1	IGHM, IGHD
ERR2567216	Unknown	PBMC	RACE	Unknown	Unknown	325+275	Illumina MiSeq	Unavailable	CH1	IGHM, IGHD
ERR2567217	Unknown	PBMC	RACE	Unknown	Unknown	325+275	Illumina MiSeq	Unavailable	CH1	IGHM, IGHD
ERR2567218	Unknown	PBMC	RACE	Unknown	Unknown	325+275	Illumina MiSeq	Unavailable	CH1	IGHM, IGHD
ERR2567219	Unknown	PBMC	RACE	Unknown	Unknown	325+275	Illumina MiSeq	Unavailable	CH1	IGHM, IGHD
ERR2567220	Unknown	PBMC	RACE	Unknown	Unknown	325+275	Illumina MiSeq	Unavailable	CH1	IGHM, IGHD
ERR2567221	Unknown	PBMC	RACE	Celiac disease	Unknown	325+275	Illumina MiSeq	Unavailable	CH1	IGHM, IGHD
ERR2567223	Unknown	PBMC	RACE	Celiac disease	Unknown	325+275	Illumina MiSeq	Unavailable	CH1	IGHM, IGHD
ERR2567224	Unknown	PBMC	RACE	Unknown	Unknown	325+275	Illumina MiSeq	Unavailable	CH1	IGHM, IGHD
ERR2567225	Unknown	PBMC	RACE	Unknown	Unknown	325+275	Illumina MiSeq	Unavailable	CH1	IGHM, IGHD
ERR2567226	Unknown	PBMC	RACE	Unknown	Unknown	325+275	Illumina MiSeq	Unavailable	CH1	IGHM, IGHD
ERR2567227	Unknown	PBMC	RACE	Unknown	Unknown	325+275	Illumina MiSeq	Unavailable	CH1	IGHM, IGHD
ERR2567228	Unknown	PBMC	RACE	Unknown	Unknown	325+275	Illumina MiSeq	Unavailable	CH1	IGHM, IGHD
ERR2567229	Unknown	PBMC	RACE	Celiac disease	Unknown	325+275	Illumina MiSeq	Unavailable	CH1	IGHM, IGHD
ERR2567230	Unknown	PBMC	RACE	Unknown	Unknown	325+275	Illumina MiSeq	Unavailable	CH1	IGHM, IGHD
ERR2567231	Unknown	PBMC	RACE	Unknown	Unknown	325+275	Illumina MiSeq	Unavailable	CH1	IGHM, IGHD
ERR2567232	Unknown	PBMC	RACE	Unknown	Unknown	325+275	Illumina MiSeq	Unavailable	CH1	IGHM, IGHD
ERR2567233	Unknown	PBMC	RACE	Unknown	Unknown	325+275	Illumina MiSeq	Unavailable	CH1	IGHM, IGHD
ERR2567234	Unknown	PBMC	RACE	Celiac disease	Unknown	325+275	Illumina MiSeq	Unavailable	CH1	IGHM, IGHD
ERR2567235	Unknown	PBMC	RACE	Unknown	Unknown	325+275	Illumina MiSeq	Unavailable	CH1	IGHM, IGHD
ERR2567236	Unknown	PBMC	RACE	Celiac disease	Unknown	325+275	Illumina MiSeq	Unavailable	CH1	IGHM, IGHD
ERR2567237	Unknown	PBMC	RACE	Unknown	Unknown	325+275	Illumina MiSeq	Unavailable	CH1	IGHM, IGHD
ERR2567238	Unknown	PBMC	RACE	Celiac disease	Unknown	325+275	Illumina MiSeq	Unavailable	CH1	IGHM, IGHD
ERR2567239	Unknown	PBMC	RACE	Healthy	Unknown	325+275	Illumina MiSeq	Unavailable	CH1	IGHM, IGHD
ERR2567240	Unknown	PBMC	RACE	Unknown	Unknown	325+275	Illumina MiSeq	Unavailable	CH1	IGHM, IGHD
ERR2567241	Unknown	PBMC	RACE	Unknown	Unknown	325+275	Illumina MiSeq	Unavailable	CH1	IGHM, IGHD
ERR2567242	Unknown	PBMC	RACE	Unknown	Unknown	325+275	Illumina MiSeq	Unavailable	CH1	IGHM, IGHD
ERR2567243	Unknown	PBMC	RACE	Healthy	Unknown	325+275	Illumina MiSeq	Unavailable	CH1	IGHM, IGHD
ERR2567244	Unknown	PBMC	RACE	Unknown	Unknown	325+275	Illumina MiSeq	Unavailable	CH1	IGHM, IGHD
ERR2567245	Unknown	PBMC	RACE	Healthy	Unknown	325+275	Illumina MiSeq	Unavailable	CH1	IGHM, IGHD
ERR2567246	Unknown	PBMC	RACE	Unknown	Unknown	325+275	Illumina MiSeq	Unavailable	CH1	IGHM, IGHD
ERR2567247	Unknown	PBMC	RACE	Unknown	Unknown	325+275	Illumina MiSeq	Unavailable	CH1	IGHM, IGHD
ERR2567248	Unknown	PBMC	RACE	Unknown	Unknown	325+275	Illumina MiSeq	Unavailable	CH1	IGHM, IGHD
ERR2567249	Unknown	PBMC	RACE	Unknown	Unknown	325+275	Illumina MiSeq	Unavailable	CH1	IGHM, IGHD
ERR2567250	Unknown	PBMC	RACE	Unknown	Unknown	325+275	Illumina MiSeq	Unavailable	CH1	IGHM, IGHD
ERR2567251	Unknown	PBMC	RACE	Healthy	Unknown	325+275	Illumina MiSeq	Unavailable	CH1	IGHM, IGHD
ERR2567252	Unknown	PBMC	RACE	Unknown	Unknown	325+275	Illumina MiSeq	Unavailable	CH1	IGHM, IGHD
ERR2567253	Unknown	PBMC	RACE	Unknown	Unknown	325+275	Illumina MiSeq	Unavailable	CH1	IGHM, IGHD
ERR2567254	Unknown	PBMC	RACE	Celiac disease	Unknown	325+275	Illumina MiSeq	Unavailable	CH1	IGHM, IGHD
ERR2567255	Unknown	PBMC	RACE	Unknown	Unknown	325+275	Illumina MiSeq	Unavailable	CH1	IGHM, IGHD
ERR2567256	Unknown	PBMC	RACE	Celiac disease	Unknown	325+275	Illumina MiSeq	Unavailable	CH1	IGHM, IGHD
ERR2567257	Unknown	PBMC	RACE	Unknown	Unknown	325+275	Illumina MiSeq	Unavailable	CH1	IGHM, IGHD
ERR2567258	Unknown	PBMC	RACE	Unknown	Unknown	325+275	Illumina MiSeq	Unavailable	CH1	IGHM, IGHD
ERR2567259	Unknown	PBMC	RACE	Healthy	Unknown	325+275	Illumina MiSeq	Unavailable	CH1	IGHM, IGHD
ERR2567260	Unknown	PBMC	RACE	Healthy	Unknown	325+275	Illumina MiSeq	Unavailable	CH1	IGHM, IGHD
ERR2567261	Unknown	PBMC	RACE	Celiac disease	Unknown	325+275	Illumina MiSeq	Unavailable	CH1	IGHM, IGHD
ERR2567262	Unknown	PBMC	RACE	Unknown	Unknown	325+275	Illumina MiSeq	Unavailable	CH1	IGHM, IGHD
ERR2567263	Unknown	PBMC	RACE	Unknown	Unknown	325+275	Illumina MiSeq	Unavailable	CH1	IGHM, IGHD
ERR2567264	Unknown	PBMC	RACE	Unknown	Unknown	325+275	Illumina MiSeq	Unavailable	CH1	IGHM, IGHD
ERR2567265	Unknown	PBMC	RACE	Unknown	Unknown	325+275	Illumina MiSeq	Unavailable	CH1	IGHM, IGHD
ERR2567266	Unknown	PBMC	RACE	Unknown	Unknown	325+275	Illumina MiSeq	Unavailable	CH1	IGHM, IGHD
ERR2567267	Unknown	PBMC	RACE	Healthy	Unknown	325+275	Illumina MiSeq	Unavailable	CH1	IGHM, IGHD
ERR2567268	Unknown	PBMC	RACE	Unknown	Unknown	325+275	Illumina MiSeq	Unavailable	CH1	IGHM, IGHD
ERR2567269	Unknown	PBMC	RACE	Celiac disease	Unknown	325+275	Illumina MiSeq	Unavailable	CH1	IGHM, IGHD
ERR2567270	Unknown	PBMC	RACE	Celiac disease	Unknown	325+275	Illumina MiSeq	Unavailable	CH1	IGHM, IGHD
ERR2567271	Unknown	PBMC	RACE	Unknown	Unknown	325+275	Illumina MiSeq	Unavailable	CH1	IGHM, IGHD
ERR2567272	Unknown	PBMC	RACE	Unknown	Unknown	325+275	Illumina MiSeq	Unavailable	CH1	IGHM, IGHD
ERR2567273	Unknown	PBMC	RACE	Unknown	Unknown	325+275	Illumina MiSeq	Unavailable	CH1	IGHM
ERR2567274	Unknown	PBMC	RACE	Unknown	Unknown	325+275	Illumina MiSeq	Unavailable	CH1	IGHM, IGHD
ERR2567276	Unknown	PBMC	RACE	Unknown	Unknown	325+275	Illumina MiSeq	Unavailable	CH1	IGHM
ERR2567277	Unknown	PBMC	RACE	Unknown	Unknown	325+275	Illumina MiSeq	Unavailable	CH1	IGHM, IGHD
ERR2567196	Unknown	PBMC	RACE	Unknown	Unknown	2×300	Illumina MiSeq	Unavailable	CH1	IGHM, IGHD
ERR2567222	Unknown	PBMC	RACE	Unknown	Unknown	2×300	Illumina MiSeq	Unavailable	CH1	IGHM, IGHD
SRR611538	Unknown	PBMC	Multiplex	Unknown	Unknown	2×250	Illumina MiSeq	FR1	CH1	IGHG, None
SRR611539	Unknown	PBMC	Multiplex	Unknown	Unknown	2×250	Illumina MiSeq	FR1	CH1	IGHG, None
SRR611801	Unknown	PBMC	Multiplex	Unknown	Unknown	2×250	Illumina MiSeq	FR1	CH1	IGHM
SRR611803	Unknown	PBMC	Multiplex	Unknown	Unknown	2×250	Illumina MiSeq	FR1	CH1	IGHG
SRR1383326	Female	Other	Multiplex	Multiple sclerosis	74	2×250	Illumina MiSeq	FR1	CH1	IGHG, None, IGHM, IGHA, IGHD, IGHE
SRR1383447	Female	Other	Multiplex	Multiple sclerosis	74	2×250	Illumina MiSeq	FR1	CH1	IGHG, None, IGHM, IGHA, IGHD, IGHE
SRR1383448	Female	Other	Multiplex	Multiple sclerosis	74	2×250	Illumina MiSeq	FR1	CH1	None, IGHG, IGHM, IGHA, IGHD, IGHE
SRR1383449	Female	Other	Multiplex	Multiple sclerosis	74	2×250	Illumina MiSeq	FR1	CH1	IGHG, None
SRR1383450	Female	Other	Multiplex	Multiple sclerosis	74	2×250	Illumina MiSeq	FR1	CH1	IGHG, None
SRR1383451	Male	Other	Multiplex	Multiple sclerosis	80	2×250	Illumina MiSeq	FR1	CH1	IGHG, None, IGHM, IGHA, IGHD, IGHE
SRR1383452	Male	Other	Multiplex	Multiple sclerosis	80	2×250	Illumina MiSeq	FR1	CH1	IGHG, None, IGHM, IGHA, IGHD, IGHE
SRR1383453	Male	Other	Multiplex	Multiple sclerosis	80	2×250	Illumina MiSeq	FR1	CH1	IGHG, None, IGHM, IGHA, IGHD, IGHE
SRR1383457	Female	Other	Multiplex	Multiple sclerosis	63	2×250	Illumina MiSeq	FR1	CH1	IGHG, None
SRR1383458	Female	Other	Multiplex	Multiple sclerosis	63	2×250	Illumina MiSeq	FR1	CH1	IGHG, None
SRR1383459	Female	Other	Multiplex	Multiple sclerosis	63	2×250	Illumina MiSeq	FR1	CH1	IGHG, None
SRR1383460	Female	Other	Multiplex	Multiple sclerosis	63	2×250	Illumina MiSeq	FR1	CH1	IGHG, None, IGHA, IGHM, IGHE
SRR1383461	Female	Other	Multiplex	Multiple sclerosis	63	2×250	Illumina MiSeq	FR1	CH1	IGHG, None, IGHA, IGHM, IGHE
SRR1383462	Female	Other	Multiplex	Multiple sclerosis	63	2×250	Illumina MiSeq	FR1	CH1	IGHG, None, IGHA, IGHM, IGHE
SRR1383463	Female	Other	Multiplex	Multiple sclerosis	63	2×250	Illumina MiSeq	FR1	CH1	IGHG, None, IGHA, IGHM, IGHE, IGHD
SRR1383464	Female	Other	Multiplex	Multiple sclerosis	63	2×250	Illumina MiSeq	FR1	CH1	IGHG, None, IGHA, IGHM, IGHE, IGHD
SRR1383465	Female	Other	Multiplex	Multiple sclerosis	63	2×250	Illumina MiSeq	FR1	CH1	IGHG, None, IGHA, IGHM, IGHE, IGHD
SRR1383466	Female	Other	Multiplex	Multiple sclerosis	63	2×250	Illumina MiSeq	FR1	CH1	IGHG, None
SRR1383467	Female	Other	Multiplex	Multiple sclerosis	63	2×250	Illumina MiSeq	FR1	CH1	IGHG, None
SRR1383468	Female	Other	Multiplex	Multiple sclerosis	63	2×250	Illumina MiSeq	FR1	CH1	IGHG, None
SRR1383469	Female	Other	Multiplex	Multiple sclerosis	63	2×250	Illumina MiSeq	FR1	CH1	IGHG, None
SRR1383470	Female	Other	Multiplex	Multiple sclerosis	63	2×250	Illumina MiSeq	FR1	CH1	IGHG, None
SRR1383471	Female	Other	Multiplex	Multiple sclerosis	63	2×250	Illumina MiSeq	FR1	CH1	IGHG
SRR1383472	Female	Other	Multiplex	Multiple sclerosis	53	2×250	Illumina MiSeq	FR1	CH1	None, IGHM, IGHG, IGHA, IGHD
SRR1383473	Female	Other	Multiplex	Multiple sclerosis	53	2×250	Illumina MiSeq	FR1	CH1	None, IGHM, IGHG, IGHA, IGHD
SRR1383474	Female	Other	Multiplex	Multiple sclerosis	53	2×250	Illumina MiSeq	FR1	CH1	None, IGHM, IGHA, IGHG, IGHD
SRR1383475	Female	Other	Multiplex	Multiple sclerosis	53	2×250	Illumina MiSeq	FR1	CH1	IGHG, None
SRR1383476	Female	Other	Multiplex	Multiple sclerosis	53	2×250	Illumina MiSeq	FR1	CH1	IGHG, None
SRR1959454	Female	PBMC	Multiplex	Influenza	Unknown	2×300	Illumina MiSeq	FR1	CH1	IGHM, IGHA, IGHG, None
SRR1574826	Female	PBMC	Multiplex	Systemic lupus erythematosus	Unknown	2×250	Illumina MiSeq	FR1	CH1	IGHM
SRR1574827	Female	PBMC	Multiplex	Systemic lupus erythematosus	Unknown	2×250	Illumina MiSeq	FR1	CH1	IGHA, IGHG, IGHM
SRR1574828	Female	PBMC	Multiplex	Systemic lupus erythematosus	Unknown	2×250	Illumina MiSeq	FR1	CH1	IGHA, IGHG, IGHM
SRR1574829	Female	PBMC	Multiplex	Systemic lupus erythematosus	Unknown	2×250	Illumina MiSeq	FR1	CH1	IGHA, IGHG, IGHM
SRR1574830	Female	PBMC	Multiplex	Systemic lupus erythematosus	Unknown	2×250	Illumina MiSeq	FR1	CH1	IGHM
SRR1574832	Female	PBMC	Multiplex	Systemic lupus erythematosus	Unknown	2×250	Illumina MiSeq	FR1	CH1	IGHA, IGHG, IGHM
SRR1574833	Female	PBMC	Multiplex	Systemic lupus erythematosus	Unknown	2×250	Illumina MiSeq	FR1	CH1	IGHG, IGHA, IGHM
SRR1574834	Female	PBMC	Multiplex	Systemic lupus erythematosus	Unknown	2×250	Illumina MiSeq	FR1	CH1	IGHM
SRR1574835	Female	PBMC	Multiplex	Systemic lupus erythematosus	Unknown	2×250	Illumina MiSeq	FR1	CH1	IGHG, IGHM, IGHA
SRR1574836	Female	PBMC	Multiplex	Systemic lupus erythematosus	Unknown	2×250	Illumina MiSeq	FR1	CH1	IGHG, IGHA, IGHM
SRR1574837	Female	PBMC	Multiplex	Systemic lupus erythematosus	Unknown	2×250	Illumina MiSeq	FR1	CH1	IGHG, IGHA, IGHM
SRR1574838	Female	PBMC	Multiplex	Influenza	Unknown	2×250	Illumina MiSeq	FR1	CH1	IGHM, IGHA
SRR1574839	Female	PBMC	Multiplex	Influenza	Unknown	2×250	Illumina MiSeq	FR1	CH1	IGHA, IGHG, IGHM
SRR1574840	Female	PBMC	Multiplex	Influenza	Unknown	2×250	Illumina MiSeq	FR1	CH1	IGHA, IGHG, IGHM
SRR1574841	Female	PBMC	Multiplex	Influenza	Unknown	2×250	Illumina MiSeq	FR1	CH1	IGHA, IGHG, IGHM
SRR1574842	Female	PBMC	Multiplex	Influenza	Unknown	2×250	Illumina MiSeq	FR1	CH1	IGHM
SRR1574843	Female	PBMC	Multiplex	Influenza	Unknown	2×250	Illumina MiSeq	FR1	CH1	IGHA, IGHG, IGHM
SRR1574844	Female	PBMC	Multiplex	Influenza	Unknown	2×250	Illumina MiSeq	FR1	CH1	IGHA, IGHG, IGHM
SRR1574845	Female	PBMC	Multiplex	Influenza	Unknown	2×250	Illumina MiSeq	FR1	CH1	IGHG, IGHA, IGHM
SRR1574846	Female	PBMC	Multiplex	Tetanus	Unknown	2×250	Illumina MiSeq	FR1	CH1	IGHM
SRR1574847	Female	PBMC	Multiplex	Tetanus	Unknown	2×250	Illumina MiSeq	FR1	CH1	IGHA
SRR1574848	Female	PBMC	Multiplex	Tetanus	Unknown	2×250	Illumina MiSeq	FR1	CH1	IGHA, IGHG, IGHM
SRR1574849	Female	PBMC	Multiplex	Tetanus	Unknown	2×250	Illumina MiSeq	FR1	CH1	IGHA, IGHG, IGHM
SRR1574854	Female	PBMC	Multiplex	Systemic lupus erythematosus	Unknown	2×250	Illumina MiSeq	FR1	CH1	IGHM
SRR1574855	Female	PBMC	Multiplex	Influenza	Unknown	2×250	Illumina MiSeq	FR1	CH1	IGHM
SRR1574856	Female	PBMC	Multiplex	Influenza	Unknown	2×250	Illumina MiSeq	FR1	CH1	IGHA, IGHM
SRR1574857	Female	PBMC	Multiplex	Influenza	Unknown	2×250	Illumina MiSeq	FR1	CH1	IGHA, IGHG, IGHM
SRR1574858	Female	PBMC	Multiplex	Influenza	Unknown	2×250	Illumina MiSeq	FR1	CH1	IGHA, IGHM, IGHG
SRR1574859	Female	PBMC	Multiplex	Tetanus	Unknown	2×250	Illumina MiSeq	FR1	CH1	IGHM
SRR1574861	Female	PBMC	Multiplex	Tetanus	Unknown	2×250	Illumina MiSeq	FR1	CH1	IGHA, IGHG, IGHM
SRR1574862	Female	PBMC	Multiplex	Tetanus	Unknown	2×250	Illumina MiSeq	FR1	CH1	IGHG, IGHA, IGHM
SRR1574863	Female	PBMC	Multiplex	Tetanus	31	2×250	Illumina MiSeq	FR1	CH1	IGHM
SRR1574864	Female	PBMC	Multiplex	Tetanus	31	2×250	Illumina MiSeq	FR1	CH1	IGHA, IGHG
SRR1574865	Female	PBMC	Multiplex	Tetanus	31	2×250	Illumina MiSeq	FR1	CH1	IGHG, IGHA
SRR1574866	Female	PBMC	Multiplex	Tetanus	31	2×250	Illumina MiSeq	FR1	CH1	IGHG, IGHA
SRR1574867	Female	PBMC	Multiplex	Tetanus	Unknown	2×250	Illumina MiSeq	FR1	CH1	IGHM
SRR1574868	Female	PBMC	Multiplex	Tetanus	Unknown	2×250	Illumina MiSeq	FR1	CH1	IGHA
SRR1574869	Female	PBMC	Multiplex	Tetanus	Unknown	2×250	Illumina MiSeq	FR1	CH1	IGHG, IGHA, IGHM
SRR1574870	Female	PBMC	Multiplex	Tetanus	Unknown	2×250	Illumina MiSeq	FR1	CH1	IGHG, IGHA, IGHM
SRR1574871	Female	PBMC	Multiplex	IgG4-RD	Unknown	2×250	Illumina MiSeq	FR1	CH1	IGHG, IGHA, IGHM
SRR1574872	Female	PBMC	Multiplex	IgG4-RD	Unknown	2×250	Illumina MiSeq	FR1	CH1	IGHG, IGHA, IGHM
SRR1574873	Female	PBMC	Multiplex	IgG4-RD	Unknown	2×250	Illumina MiSeq	FR1	CH1	IGHA, IGHG
SRR1574874	Female	PBMC	Multiplex	IgG4-RD	Unknown	2×250	Illumina MiSeq	FR1	CH1	IGHA, IGHG
SRR1574875	Female	PBMC	Multiplex	Pemphigus	Unknown	2×250	Illumina MiSeq	FR1	CH1	IGHA, IGHG, IGHM
SRR1574876	Female	PBMC	Multiplex	Pemphigus	Unknown	2×250	Illumina MiSeq	FR1	CH1	IGHG, IGHA, IGHM
SRR1574824	Female	PBMC	Multiplex	Systemic lupus erythematosus	Unknown	2×250	Illumina MiSeq	FR1	CH1	IGHM
SRR1964787	Female	PBMC	Multiplex	Influenza	Unknown	2×300	Illumina MiSeq	FR1	CH1	IGHM, IGHA, IGHG, None
SRR1964788	Female	PBMC	Multiplex	Influenza	Unknown	2×300	Illumina MiSeq	FR1	CH1	IGHA, IGHM, IGHG, None
SRR1964800	Female	PBMC	Multiplex	Systemic lupus erythematosus	Unknown	2×300	Illumina MiSeq	FR1	CH1	IGHM, IGHA, IGHG, None
SRR1959703	Female	PBMC	Multiplex	Systemic lupus erythematosus	Unknown	2×250	Illumina MiSeq	FR1	CH1	IGHM, IGHA, IGHG
SRR1960371	Female	PBMC	Multiplex	Systemic lupus erythematosus	Unknown	2×250	Illumina MiSeq	FR1	CH1	IGHA, IGHG, IGHM
SRR1961400	Female	PBMC	Multiplex	Systemic lupus erythematosus	Unknown	2×250	Illumina MiSeq	FR1	CH1	IGHA, IGHG, IGHM
SRR1964710	Female	PBMC	Multiplex	Systemic lupus erythematosus	Unknown	2×250	Illumina MiSeq	FR1	CH1	IGHM, IGHG, IGHA, None
SRR1964711	Female	PBMC	Multiplex	Systemic lupus erythematosus	Unknown	2×250	Illumina MiSeq	FR1	CH1	IGHM, IGHG, IGHA, None
SRR1964712	Female	PBMC	Multiplex	Systemic lupus erythematosus	Unknown	2×250	Illumina MiSeq	FR1	CH1	IGHM, IGHA, IGHG, None
SRR1964713	Female	PBMC	Multiplex	Influenza	Unknown	2×250	Illumina MiSeq	FR1	CH1	IGHM, IGHA, IGHG
SRR1964786	Female	PBMC	Multiplex	Influenza	Unknown	2×250	Illumina MiSeq	FR1	CH1	IGHM, IGHA, IGHG
SRR1964792	Female	PBMC	Multiplex	Tetanus	Unknown	2×250	Illumina MiSeq	FR1	CH1	IGHM, IGHA, IGHG
SRR1964793	Female	PBMC	Multiplex	Tetanus	Unknown	2×250	Illumina MiSeq	FR1	CH1	IGHA, IGHG, IGHM
SRR1964794	Female	PBMC	Multiplex	Tetanus	Unknown	2×250	Illumina MiSeq	FR1	CH1	IGHM, IGHA, IGHG
SRR1964795	Female	PBMC	Multiplex	Tetanus	Unknown	2×250	Illumina MiSeq	FR1	CH1	IGHG, IGHA, IGHM
SRR1964796	Female	PBMC	Multiplex	IgG4-RD	Unknown	2×250	Illumina MiSeq	FR1	CH1	IGHA, IGHG
SRR1964797	Female	PBMC	Multiplex	IgG4-RD	Unknown	2×250	Illumina MiSeq	FR1	CH1	IGHG, IGHA, IGHM, None
SRR1964798	Female	PBMC	Multiplex	Pemphigus	Unknown	2×250	Illumina MiSeq	FR1	CH1	IGHA, IGHG, IGHM
SRR1964799	Female	PBMC	Multiplex	Pemphigus	Unknown	2×250	Illumina MiSeq	FR1	CH1	IGHG, IGHA, IGHM
SRR1964801	Female	PBMC	Multiplex	Systemic lupus erythematosus	Unknown	2×250	Illumina MiSeq	FR1	CH1	IGHA, IGHM, IGHG, None
SRR2088756	Unknown	Bone marrow	Multiplex	Healthy	Unknown	2×250	Illumina MiSeq	FR1	CH1	IGHA, IGHG
SRR2088759	Unknown	Bone marrow	Multiplex	Healthy	Unknown	2×250	Illumina MiSeq	FR1	CH1	IGHG, IGHA
SRR2088761	Unknown	Bone marrow	Multiplex	Healthy	Unknown	2×250	Illumina MiSeq	FR1	CH1	IGHG, IGHA
SRR2131175	Male	PBMC	Multiplex	Healthy	32	2×300	Illumina MiSeq	Leader	CH1	IGHM, IGHD, IGHA
SRR2131177	Male	PBMC	Multiplex	Healthy	32	2×300	Illumina MiSeq	FR1	CH1	IGHM, IGHA, IGHD
SRR2558611	Unknown	PBMC	RACE	Unknown	Unknown	400+200	Illumina MiSeq	Unavailable	CH1	IGHA
SRR2558612	Unknown	PBMC	RACE	Unknown	Unknown	400+200	Illumina MiSeq	Unavailable	CH1	IGHM, IGHD, IGHG, IGHA, None
SRR3192715	Unknown	PBMC	RACE	Unknown	Unknown	400+100	Illumina MiSeq	Unavailable	CH1	IGHA, IGHG, None, IGHM
SRR3192716	Unknown	PBMC	RACE	Unknown	Unknown	400+100	Illumina MiSeq	Unavailable	CH1	IGHG, IGHE, IGHA, None
SRR2558607	Unknown	PBMC	RACE	Unknown	Unknown	350+280	Illumina MiSeq	Unavailable	CH1	IGHM, IGHG, IGHD, IGHA
SRR2558608	Unknown	PBMC	RACE	Unknown	Unknown	350+280	Illumina MiSeq	Unavailable	CH1	IGHM, IGHG, IGHA, IGHD
SRR2905655	Female	PBMC	RACE	Healthy	27	2×300	Illumina MiSeq	Unavailable	CH1	IGHM, IGHA, IGHG
SRR2905656	Female	PBMC	RACE	Healthy	27	2×300	Illumina MiSeq	Unavailable	CH1	IGHM, IGHD, IGHA, IGHG
SRR2905661	Female	PBMC	RACE	Healthy	27	2×300	Illumina MiSeq	Unavailable	CH1	IGHM, IGHA, IGHG
SRR2905662	Female	PBMC	RACE	Healthy	27	2×300	Illumina MiSeq	Unavailable	CH1	IGHM, IGHD, IGHA, IGHG
SRR2905667	Female	PBMC	RACE	Healthy	25	2×300	Illumina MiSeq	Unavailable	CH1	IGHM, IGHA, IGHG
SRR2905668	Female	PBMC	RACE	Healthy	25	2×300	Illumina MiSeq	Unavailable	CH1	IGHM, IGHD, IGHA, IGHG
SRR2905673	Female	PBMC	RACE	Healthy	25	2×300	Illumina MiSeq	Unavailable	CH1	IGHM, IGHA, IGHG
SRR2905674	Female	PBMC	RACE	Healthy	25	2×300	Illumina MiSeq	Unavailable	CH1	IGHM, IGHG, IGHA, IGHD
SRR2905679	Male	PBMC	RACE	Healthy	24	2×300	Illumina MiSeq	Unavailable	CH1	IGHM, IGHA, IGHG, IGHD
SRR2905680	Male	PBMC	RACE	Healthy	24	2×300	Illumina MiSeq	Unavailable	CH1	IGHM, IGHD, IGHA, IGHG
SRR2905685	Male	PBMC	RACE	Healthy	24	2×300	Illumina MiSeq	Unavailable	CH1	IGHM, IGHA
SRR2905686	Male	PBMC	RACE	Healthy	24	2×300	Illumina MiSeq	Unavailable	CH1	IGHM, IGHD, IGHA
SRR2905691	Male	PBMC	RACE	Healthy	22	2×300	Illumina MiSeq	Unavailable	CH1	IGHM, IGHA, IGHG, IGHD
SRR2905692	Male	PBMC	RACE	Healthy	22	2×300	Illumina MiSeq	Unavailable	CH1	IGHM, IGHD, IGHA, IGHG
SRR2905697	Male	PBMC	RACE	Healthy	22	2×300	Illumina MiSeq	Unavailable	CH1	IGHM, IGHA, IGHG, IGHD
SRR2905698	Male	PBMC	RACE	Healthy	22	2×300	Illumina MiSeq	Unavailable	CH1	IGHM, IGHD, IGHG, IGHA
SRR2905703	Male	PBMC	RACE	Healthy	27	2×300	Illumina MiSeq	Unavailable	CH1	IGHM, IGHA, IGHG
SRR2905704	Male	PBMC	RACE	Healthy	27	2×300	Illumina MiSeq	Unavailable	CH1	IGHM, IGHD, IGHA, IGHG
SRR2905709	Male	PBMC	RACE	Healthy	27	2×300	Illumina MiSeq	Unavailable	CH1	IGHM, IGHA
SRR2905710	Male	PBMC	RACE	Healthy	27	2×300	Illumina MiSeq	Unavailable	CH1	IGHM, IGHD, IGHA
SRR3099048	Female	PBMC	Multiplex	Healthy	25	2×300	Illumina MiSeq	FR1	CH1	IGHG
SRR3099049	Female	PBMC	Multiplex	HBV	25	2×300	Illumina MiSeq	FR1	CH1	IGHG
SRR3099051	Female	PBMC	Multiplex	HBV	33	2×300	Illumina MiSeq	FR1	CH1	IGHG
SRR3099052	Female	PBMC	Multiplex	HBV	33	2×300	Illumina MiSeq	FR1	CH1	IGHG
SRR3099053	Female	PBMC	Multiplex	HBV	33	2×300	Illumina MiSeq	FR1	CH1	IGHG
SRR3099054	Female	PBMC	Multiplex	HBV	33	2×300	Illumina MiSeq	FR1	CH1	IGHG
SRR3099055	Female	PBMC	Multiplex	HBV	33	2×300	Illumina MiSeq	FR1	CH1	IGHM
SRR3099056	Female	PBMC	Multiplex	HBV	33	2×300	Illumina MiSeq	FR1	CH1	IGHG
SRR3099057	Female	PBMC	Multiplex	HBV	33	2×300	Illumina MiSeq	FR1	CH1	IGHG
SRR3099058	Female	PBMC	Multiplex	HBV	33	2×300	Illumina MiSeq	FR1	CH1	IGHG
SRR3099059	Female	PBMC	Multiplex	HBV	33	2×300	Illumina MiSeq	FR1	CH1	IGHG
SRR3099060	Female	PBMC	Multiplex	HBV	33	2×300	Illumina MiSeq	FR1	CH1	IGHG
SRR3099061	Female	PBMC	Multiplex	HBV	25	2×300	Illumina MiSeq	FR1	CH1	IGHG
SRR3099062	Female	PBMC	Multiplex	Healthy	20	2×300	Illumina MiSeq	FR1	CH1	IGHG
SRR3099063	Female	PBMC	Multiplex	HBV	20	2×300	Illumina MiSeq	FR1	CH1	IGHG
SRR3099064	Female	PBMC	Multiplex	HBV	20	2×300	Illumina MiSeq	FR1	CH1	IGHG
SRR3099065	Female	PBMC	Multiplex	HBV	20	2×300	Illumina MiSeq	FR1	CH1	IGHG
SRR3099066	Female	PBMC	Multiplex	HBV	20	2×300	Illumina MiSeq	FR1	CH1	IGHG
SRR3099067	Female	PBMC	Multiplex	HBV	20	2×300	Illumina MiSeq	FR1	CH1	IGHG
SRR3099068	Female	PBMC	Multiplex	HBV	20	2×300	Illumina MiSeq	FR1	CH1	IGHG
SRR3099070	Female	PBMC	Multiplex	HBV	20	2×300	Illumina MiSeq	FR1	CH1	IGHG
SRR3099071	Female	PBMC	Multiplex	HBV	20	2×300	Illumina MiSeq	FR1	CH1	IGHG
SRR3099072	Female	PBMC	Multiplex	HBV	20	2×300	Illumina MiSeq	FR1	CH1	IGHG
SRR3099074	Female	PBMC	Multiplex	HBV	20	2×300	Illumina MiSeq	FR1	CH1	IGHM
SRR3099075	Female	PBMC	Multiplex	HBV	20	2×300	Illumina MiSeq	FR1	CH1	IGHG
SRR3099076	Female	PBMC	Multiplex	HBV	20	2×300	Illumina MiSeq	FR1	CH1	IGHG
SRR3099077	Female	PBMC	Multiplex	HBV	20	2×300	Illumina MiSeq	FR1	CH1	IGHG
SRR3099078	Female	PBMC	Multiplex	HBV	20	2×300	Illumina MiSeq	FR1	CH1	IGHG
SRR3099079	Female	PBMC	Multiplex	HBV	20	2×300	Illumina MiSeq	FR1	CH1	IGHG
SRR3099080	Female	PBMC	Multiplex	Healthy	22	2×300	Illumina MiSeq	FR1	CH1	IGHG
SRR3099081	Female	PBMC	Multiplex	HBV	22	2×300	Illumina MiSeq	FR1	CH1	IGHG
SRR3099082	Female	PBMC	Multiplex	HBV	22	2×300	Illumina MiSeq	FR1	CH1	IGHG
SRR3099083	Female	PBMC	Multiplex	HBV	22	2×300	Illumina MiSeq	FR1	CH1	IGHG
SRR3099084	Female	PBMC	Multiplex	HBV	25	2×300	Illumina MiSeq	FR1	CH1	IGHG
SRR3099085	Female	PBMC	Multiplex	HBV	22	2×300	Illumina MiSeq	FR1	CH1	IGHG
SRR3099086	Female	PBMC	Multiplex	HBV	22	2×300	Illumina MiSeq	FR1	CH1	IGHG
SRR3099087	Female	PBMC	Multiplex	HBV	22	2×300	Illumina MiSeq	FR1	CH1	IGHG
SRR3099088	Female	PBMC	Multiplex	HBV	22	2×300	Illumina MiSeq	FR1	CH1	IGHG
SRR3099090	Female	PBMC	Multiplex	HBV	22	2×300	Illumina MiSeq	FR1	CH1	IGHG
SRR3099091	Female	PBMC	Multiplex	HBV	22	2×300	Illumina MiSeq	FR1	CH1	IGHG
SRR3099092	Female	PBMC	Multiplex	HBV	22	2×300	Illumina MiSeq	FR1	CH1	IGHM
SRR3099093	Female	PBMC	Multiplex	HBV	22	2×300	Illumina MiSeq	FR1	CH1	IGHG
SRR3099094	Female	PBMC	Multiplex	HBV	22	2×300	Illumina MiSeq	FR1	CH1	IGHG
SRR3099095	Female	PBMC	Multiplex	HBV	22	2×300	Illumina MiSeq	FR1	CH1	IGHG
SRR3099096	Female	PBMC	Multiplex	HBV	25	2×300	Illumina MiSeq	FR1	CH1	IGHG
SRR3099097	Female	PBMC	Multiplex	HBV	22	2×300	Illumina MiSeq	FR1	CH1	IGHG
SRR3099098	Female	PBMC	Multiplex	HBV	22	2×300	Illumina MiSeq	FR1	CH1	IGHG
SRR3099099	Female	PBMC	Multiplex	HBV	25	2×300	Illumina MiSeq	FR1	CH1	IGHG
SRR3099100	Male	PBMC	Multiplex	Healthy	28	2×300	Illumina MiSeq	FR1	CH1	IGHG
SRR3099101	Male	PBMC	Multiplex	HBV	28	2×300	Illumina MiSeq	FR1	CH1	IGHG
SRR3099102	Male	PBMC	Multiplex	HBV	28	2×300	Illumina MiSeq	FR1	CH1	IGHG
SRR3099103	Male	PBMC	Multiplex	HBV	28	2×300	Illumina MiSeq	FR1	CH1	IGHG
SRR3099104	Female	PBMC	Multiplex	HBV	25	2×300	Illumina MiSeq	FR1	CH1	IGHG
SRR3099105	Male	PBMC	Multiplex	HBV	28	2×300	Illumina MiSeq	FR1	CH1	IGHG
SRR3099106	Male	PBMC	Multiplex	HBV	28	2×300	Illumina MiSeq	FR1	CH1	IGHG
SRR3099107	Male	PBMC	Multiplex	HBV	28	2×300	Illumina MiSeq	FR1	CH1	IGHG
SRR3099108	Male	PBMC	Multiplex	HBV	28	2×300	Illumina MiSeq	FR1	CH1	IGHG
SRR3099109	Male	PBMC	Multiplex	HBV	28	2×300	Illumina MiSeq	FR1	CH1	IGHG
SRR3099111	Male	PBMC	Multiplex	HBV	28	2×300	Illumina MiSeq	FR1	CH1	IGHG
SRR3099113	Male	PBMC	Multiplex	HBV	28	2×300	Illumina MiSeq	FR1	CH1	IGHG
SRR3099115	Male	PBMC	Multiplex	HBV	28	2×300	Illumina MiSeq	FR1	CH1	IGHG
SRR3099116	Female	PBMC	Multiplex	HBV	25	2×300	Illumina MiSeq	FR1	CH1	IGHG
SRR3099117	Male	PBMC	Multiplex	HBV	28	2×300	Illumina MiSeq	FR1	CH1	IGHG
SRR3099118	Male	PBMC	Multiplex	HBV	28	2×300	Illumina MiSeq	FR1	CH1	IGHG
SRR3099119	Female	PBMC	Multiplex	Healthy	38	2×300	Illumina MiSeq	FR1	CH1	IGHG
SRR3099120	Female	PBMC	Multiplex	HBV	38	2×300	Illumina MiSeq	FR1	CH1	IGHG
SRR3099121	Female	PBMC	Multiplex	HBV	38	2×300	Illumina MiSeq	FR1	CH1	IGHG
SRR3099122	Female	PBMC	Multiplex	HBV	38	2×300	Illumina MiSeq	FR1	CH1	IGHG
SRR3099123	Female	PBMC	Multiplex	HBV	38	2×300	Illumina MiSeq	FR1	CH1	IGHG
SRR3099124	Female	PBMC	Multiplex	HBV	38	2×300	Illumina MiSeq	FR1	CH1	IGHG
SRR3099125	Female	PBMC	Multiplex	HBV	38	2×300	Illumina MiSeq	FR1	CH1	IGHG
SRR3099126	Female	PBMC	Multiplex	HBV	38	2×300	Illumina MiSeq	FR1	CH1	IGHG
SRR3099127	Female	PBMC	Multiplex	HBV	25	2×300	Illumina MiSeq	FR1	CH1	IGHG
SRR3099130	Female	PBMC	Multiplex	HBV	38	2×300	Illumina MiSeq	FR1	CH1	IGHG
SRR3099131	Female	PBMC	Multiplex	HBV	38	2×300	Illumina MiSeq	FR1	CH1	IGHG
SRR3099132	Female	PBMC	Multiplex	HBV	38	2×300	Illumina MiSeq	FR1	CH1	IGHG
SRR3099133	Female	PBMC	Multiplex	HBV	38	2×300	Illumina MiSeq	FR1	CH1	IGHG
SRR3099134	Female	PBMC	Multiplex	HBV	38	2×300	Illumina MiSeq	FR1	CH1	IGHG
SRR3099135	Female	PBMC	Multiplex	HBV	38	2×300	Illumina MiSeq	FR1	CH1	IGHG
SRR3099136	Female	PBMC	Multiplex	HBV	38	2×300	Illumina MiSeq	FR1	CH1	IGHG
SRR3099137	Male	PBMC	Multiplex	Healthy	24	2×300	Illumina MiSeq	FR1	CH1	IGHG
SRR3099138	Male	PBMC	Multiplex	HBV	24	2×300	Illumina MiSeq	FR1	CH1	IGHG
SRR3099139	Female	PBMC	Multiplex	HBV	25	2×300	Illumina MiSeq	FR1	CH1	IGHG
SRR3099140	Male	PBMC	Multiplex	HBV	24	2×300	Illumina MiSeq	FR1	CH1	IGHG
SRR3099141	Male	PBMC	Multiplex	HBV	24	2×300	Illumina MiSeq	FR1	CH1	IGHG
SRR3099142	Male	PBMC	Multiplex	HBV	24	2×300	Illumina MiSeq	FR1	CH1	IGHG
SRR3099143	Male	PBMC	Multiplex	HBV	24	2×300	Illumina MiSeq	FR1	CH1	IGHG
SRR3099144	Male	PBMC	Multiplex	HBV	24	2×300	Illumina MiSeq	FR1	CH1	IGHG
SRR3099145	Male	PBMC	Multiplex	HBV	24	2×300	Illumina MiSeq	FR1	CH1	IGHG
SRR3099147	Male	PBMC	Multiplex	HBV	24	2×300	Illumina MiSeq	FR1	CH1	IGHG
SRR3099148	Male	PBMC	Multiplex	HBV	24	2×300	Illumina MiSeq	FR1	CH1	IGHG
SRR3099149	Male	PBMC	Multiplex	HBV	24	2×300	Illumina MiSeq	FR1	CH1	IGHG
SRR3099151	Female	PBMC	Multiplex	HBV	25	2×300	Illumina MiSeq	FR1	CH1	IGHG
SRR3099154	Male	PBMC	Multiplex	HBV	24	2×300	Illumina MiSeq	FR1	CH1	IGHG
SRR3099156	Male	PBMC	Multiplex	Healthy	25	2×300	Illumina MiSeq	FR1	CH1	IGHG
SRR3099157	Male	PBMC	Multiplex	HBV	25	2×300	Illumina MiSeq	FR1	CH1	IGHG
SRR3099158	Male	PBMC	Multiplex	HBV	25	2×300	Illumina MiSeq	FR1	CH1	IGHG
SRR3099159	Male	PBMC	Multiplex	HBV	25	2×300	Illumina MiSeq	FR1	CH1	IGHG
SRR3099160	Male	PBMC	Multiplex	HBV	25	2×300	Illumina MiSeq	FR1	CH1	IGHG
SRR3099161	Male	PBMC	Multiplex	HBV	25	2×300	Illumina MiSeq	FR1	CH1	IGHG
SRR3099163	Male	PBMC	Multiplex	HBV	25	2×300	Illumina MiSeq	FR1	CH1	IGHG
SRR3099164	Male	PBMC	Multiplex	HBV	25	2×300	Illumina MiSeq	FR1	CH1	IGHG
SRR3099165	Male	PBMC	Multiplex	HBV	25	2×300	Illumina MiSeq	FR1	CH1	IGHG
SRR3099166	Male	PBMC	Multiplex	HBV	25	2×300	Illumina MiSeq	FR1	CH1	IGHG
SRR3099167	Male	PBMC	Multiplex	HBV	25	2×300	Illumina MiSeq	FR1	CH1	IGHM
SRR3099168	Male	PBMC	Multiplex	HBV	25	2×300	Illumina MiSeq	FR1	CH1	IGHG
SRR3099169	Male	PBMC	Multiplex	HBV	25	2×300	Illumina MiSeq	FR1	CH1	IGHG
SRR3099170	Male	PBMC	Multiplex	HBV	25	2×300	Illumina MiSeq	FR1	CH1	IGHG
SRR3099171	Male	PBMC	Multiplex	HBV	25	2×300	Illumina MiSeq	FR1	CH1	IGHG
SRR3099172	Male	PBMC	Multiplex	HBV	25	2×300	Illumina MiSeq	FR1	CH1	IGHG
SRR3099174	Female	PBMC	Multiplex	Healthy	23	2×300	Illumina MiSeq	FR1	CH1	IGHG
SRR3099175	Female	PBMC	Multiplex	HBV	23	2×300	Illumina MiSeq	FR1	CH1	IGHG
SRR3099176	Female	PBMC	Multiplex	HBV	23	2×300	Illumina MiSeq	FR1	CH1	IGHG
SRR3099177	Female	PBMC	Multiplex	HBV	23	2×300	Illumina MiSeq	FR1	CH1	IGHG
SRR3099178	Female	PBMC	Multiplex	HBV	23	2×300	Illumina MiSeq	FR1	CH1	IGHG
SRR3099179	Female	PBMC	Multiplex	HBV	23	2×300	Illumina MiSeq	FR1	CH1	IGHG
SRR3099180	Female	PBMC	Multiplex	HBV	23	2×300	Illumina MiSeq	FR1	CH1	IGHG
SRR3099181	Female	PBMC	Multiplex	HBV	23	2×300	Illumina MiSeq	FR1	CH1	IGHG
SRR3099182	Female	PBMC	Multiplex	HBV	23	2×300	Illumina MiSeq	FR1	CH1	IGHG
SRR3099183	Female	PBMC	Multiplex	HBV	23	2×300	Illumina MiSeq	FR1	CH1	IGHG
SRR3099184	Female	PBMC	Multiplex	HBV	25	2×300	Illumina MiSeq	FR1	CH1	IGHG
SRR3099185	Female	PBMC	Multiplex	HBV	23	2×300	Illumina MiSeq	FR1	CH1	IGHG
SRR3099186	Female	PBMC	Multiplex	HBV	23	2×300	Illumina MiSeq	FR1	CH1	IGHG
SRR3099187	Female	PBMC	Multiplex	HBV	23	2×300	Illumina MiSeq	FR1	CH1	IGHG
SRR3099188	Female	PBMC	Multiplex	HBV	23	2×300	Illumina MiSeq	FR1	CH1	IGHG
SRR3099189	Female	PBMC	Multiplex	Healthy	33	2×300	Illumina MiSeq	FR1	CH1	IGHG
SRR3099190	Female	PBMC	Multiplex	HBV	33	2×300	Illumina MiSeq	FR1	CH1	IGHG
SRR3099191	Female	PBMC	Multiplex	HBV	33	2×300	Illumina MiSeq	FR1	CH1	IGHG
SRR3099192	Female	PBMC	Multiplex	HBV	33	2×300	Illumina MiSeq	FR1	CH1	IGHG
SRR3099193	Female	PBMC	Multiplex	HBV	33	2×300	Illumina MiSeq	FR1	CH1	IGHG
SRR3099194	Female	PBMC	Multiplex	HBV	33	2×300	Illumina MiSeq	FR1	CH1	IGHG
SRR3099380	Female	PBMC	Multiplex	HBV	59	2×300	Illumina MiSeq	FR1	CH1	IGHM, None
SRR3099381	Female	PBMC	Multiplex	HBV	59	2×300	Illumina MiSeq	FR1	CH1	IGHM
SRR3099382	Female	PBMC	Multiplex	HBV	59	2×300	Illumina MiSeq	FR1	CH1	IGHG
SRR3099383	Female	PBMC	Multiplex	HBV	59	2×300	Illumina MiSeq	FR1	CH1	IGHG
SRR3099384	Female	PBMC	Multiplex	HBV	59	2×300	Illumina MiSeq	FR1	CH1	IGHG
SRR3099386	Female	PBMC	Multiplex	HBV	59	2×300	Illumina MiSeq	FR1	CH1	IGHG
SRR3099410	Female	PBMC	Multiplex	HBV	42	2×300	Illumina MiSeq	FR1	CH1	IGHG
SRR3099411	Female	PBMC	Multiplex	HBV	42	2×300	Illumina MiSeq	FR1	CH1	IGHG
SRR3099412	Female	PBMC	Multiplex	HBV	42	2×300	Illumina MiSeq	FR1	CH1	IGHG
SRR3099413	Female	PBMC	Multiplex	HBV	42	2×300	Illumina MiSeq	FR1	CH1	IGHG, IGHM
SRR3099414	Female	PBMC	Multiplex	HBV	42	2×300	Illumina MiSeq	FR1	CH1	IGHG
SRR3099415	Female	PBMC	Multiplex	HBV	42	2×300	Illumina MiSeq	FR1	CH1	IGHM, None
SRR3099416	Female	PBMC	Multiplex	HBV	42	2×300	Illumina MiSeq	FR1	CH1	IGHM, None
SRR3099417	Female	PBMC	Multiplex	HBV	42	2×300	Illumina MiSeq	FR1	CH1	IGHM, None
SRR3099419	Female	PBMC	Multiplex	HBV	42	2×300	Illumina MiSeq	FR1	CH1	IGHM, None, IGHA
SRR3099420	Female	PBMC	Multiplex	HBV	42	2×300	Illumina MiSeq	FR1	CH1	IGHM, None
SRR3099421	Female	PBMC	Multiplex	HBV	42	2×300	Illumina MiSeq	FR1	CH1	IGHG
SRR3099422	Female	PBMC	Multiplex	HBV	42	2×300	Illumina MiSeq	FR1	CH1	IGHG
SRR3099423	Female	PBMC	Multiplex	HBV	42	2×300	Illumina MiSeq	FR1	CH1	IGHG
SRR3099424	Female	PBMC	Multiplex	HBV	42	2×300	Illumina MiSeq	FR1	CH1	IGHG
SRR3099425	Female	PBMC	Multiplex	HBV	42	2×300	Illumina MiSeq	FR1	CH1	IGHG
SRR3099426	Female	PBMC	Multiplex	HBV	57	2×300	Illumina MiSeq	FR1	CH1	IGHG
SRR3099427	Female	PBMC	Multiplex	HBV	57	2×300	Illumina MiSeq	FR1	CH1	IGHG
SRR3099428	Female	PBMC	Multiplex	HBV	57	2×300	Illumina MiSeq	FR1	CH1	IGHG
SRR3099430	Female	PBMC	Multiplex	HBV	57	2×300	Illumina MiSeq	FR1	CH1	IGHG
SRR3099431	Female	PBMC	Multiplex	HBV	57	2×300	Illumina MiSeq	FR1	CH1	IGHG
SRR3099432	Female	PBMC	Multiplex	HBV	57	2×300	Illumina MiSeq	FR1	CH1	IGHM
SRR3099433	Female	PBMC	Multiplex	HBV	57	2×300	Illumina MiSeq	FR1	CH1	IGHM, None
SRR3099434	Female	PBMC	Multiplex	HBV	57	2×300	Illumina MiSeq	FR1	CH1	IGHM, None
SRR3099435	Female	PBMC	Multiplex	HBV	57	2×300	Illumina MiSeq	FR1	CH1	IGHM, None
SRR3099436	Female	PBMC	Multiplex	HBV	57	2×300	Illumina MiSeq	FR1	CH1	IGHM
SRR3099437	Female	PBMC	Multiplex	HBV	57	2×300	Illumina MiSeq	FR1	CH1	IGHG
SRR3099438	Female	PBMC	Multiplex	HBV	57	2×300	Illumina MiSeq	FR1	CH1	IGHG
SRR3099439	Female	PBMC	Multiplex	HBV	57	2×300	Illumina MiSeq	FR1	CH1	IGHG
SRR3099441	Female	PBMC	Multiplex	HBV	57	2×300	Illumina MiSeq	FR1	CH1	IGHG
SRR3099442	Female	PBMC	Multiplex	HBV	57	2×300	Illumina MiSeq	FR1	CH1	IGHG
SRR3099443	Female	PBMC	Multiplex	HBV	41	2×300	Illumina MiSeq	FR1	CH1	IGHG
SRR3099444	Female	PBMC	Multiplex	HBV	41	2×300	Illumina MiSeq	FR1	CH1	IGHG, IGHA
SRR3099445	Female	PBMC	Multiplex	HBV	41	2×300	Illumina MiSeq	FR1	CH1	IGHG
SRR3099446	Female	PBMC	Multiplex	HBV	41	2×300	Illumina MiSeq	FR1	CH1	IGHG
SRR3099447	Female	PBMC	Multiplex	HBV	41	2×300	Illumina MiSeq	FR1	CH1	IGHG
SRR3099448	Female	PBMC	Multiplex	HBV	41	2×300	Illumina MiSeq	FR1	CH1	IGHM, None
SRR3099449	Female	PBMC	Multiplex	HBV	41	2×300	Illumina MiSeq	FR1	CH1	IGHM, None
SRR3099450	Female	PBMC	Multiplex	HBV	41	2×300	Illumina MiSeq	FR1	CH1	IGHM, None
SRR3099452	Female	PBMC	Multiplex	HBV	41	2×300	Illumina MiSeq	FR1	CH1	IGHM, None
SRR3099453	Female	PBMC	Multiplex	HBV	41	2×300	Illumina MiSeq	FR1	CH1	IGHM
SRR3099454	Female	PBMC	Multiplex	HBV	41	2×300	Illumina MiSeq	FR1	CH1	IGHG
SRR3099456	Female	PBMC	Multiplex	HBV	41	2×300	Illumina MiSeq	FR1	CH1	IGHG
SRR3099458	Female	PBMC	Multiplex	HBV	41	2×300	Illumina MiSeq	FR1	CH1	IGHG
SRR3099459	Male	PBMC	Multiplex	HBV	28	2×300	Illumina MiSeq	FR1	CH1	IGHG
SRR3099460	Male	PBMC	Multiplex	HBV	28	2×300	Illumina MiSeq	FR1	CH1	IGHG
SRR3099461	Male	PBMC	Multiplex	HBV	28	2×300	Illumina MiSeq	FR1	CH1	IGHG
SRR3099463	Male	PBMC	Multiplex	HBV	28	2×300	Illumina MiSeq	FR1	CH1	IGHG
SRR3099464	Male	PBMC	Multiplex	HBV	28	2×300	Illumina MiSeq	FR1	CH1	IGHG
SRR3099465	Male	PBMC	Multiplex	HBV	28	2×300	Illumina MiSeq	FR1	CH1	IGHM, None
SRR3099466	Male	PBMC	Multiplex	HBV	28	2×300	Illumina MiSeq	FR1	CH1	IGHM, None
SRR3099467	Male	PBMC	Multiplex	HBV	28	2×300	Illumina MiSeq	FR1	CH1	IGHM, None
SRR3099468	Male	PBMC	Multiplex	HBV	28	2×300	Illumina MiSeq	FR1	CH1	IGHM, None
SRR3099469	Male	PBMC	Multiplex	HBV	28	2×300	Illumina MiSeq	FR1	CH1	IGHM, None, IGHG
SRR3099470	Male	PBMC	Multiplex	HBV	28	2×300	Illumina MiSeq	FR1	CH1	IGHG
SRR3099471	Male	PBMC	Multiplex	HBV	28	2×300	Illumina MiSeq	FR1	CH1	IGHG
SRR3099472	Male	PBMC	Multiplex	HBV	28	2×300	Illumina MiSeq	FR1	CH1	IGHG
SRR3099474	Male	PBMC	Multiplex	HBV	28	2×300	Illumina MiSeq	FR1	CH1	IGHG
SRR3099475	Male	PBMC	Multiplex	HBV	28	2×300	Illumina MiSeq	FR1	CH1	IGHG
SRR3099476	Female	PBMC	Multiplex	HBV	59	2×300	Illumina MiSeq	FR1	CH1	IGHG
SRR3099477	Female	PBMC	Multiplex	HBV	59	2×300	Illumina MiSeq	FR1	CH1	IGHG
SRR3099478	Female	PBMC	Multiplex	HBV	59	2×300	Illumina MiSeq	FR1	CH1	IGHG
SRR3099479	Female	PBMC	Multiplex	HBV	59	2×300	Illumina MiSeq	FR1	CH1	IGHG
SRR3099480	Female	PBMC	Multiplex	HBV	59	2×300	Illumina MiSeq	FR1	CH1	IGHG
SRR3099481	Female	PBMC	Multiplex	HBV	59	2×300	Illumina MiSeq	FR1	CH1	IGHM, None
SRR3099482	Female	PBMC	Multiplex	HBV	59	2×300	Illumina MiSeq	FR1	CH1	IGHM, None
SRR3099483	Female	PBMC	Multiplex	HBV	59	2×300	Illumina MiSeq	FR1	CH1	IGHM, None
SRR3099377	Female	PBMC	Multiplex	HBV	27	2×250	Illumina MiSeq	FR1	CH1	IGHG, IGHA
SRR3099378	Female	PBMC	Multiplex	HBV	27	2×250	Illumina MiSeq	FR1	CH1	IGHG
SRR3099379	Male	PBMC	Multiplex	HBV	22	2×250	Illumina MiSeq	FR1	CH1	IGHG
SRR3099387	Male	PBMC	Multiplex	HBV	22	2×250	Illumina MiSeq	FR1	CH1	IGHG
SRR3099388	Male	PBMC	Multiplex	HBV	22	2×250	Illumina MiSeq	FR1	CH1	IGHM
SRR3099389	Male	PBMC	Multiplex	HBV	22	2×250	Illumina MiSeq	FR1	CH1	IGHM
SRR3099390	Male	PBMC	Multiplex	HBV	22	2×250	Illumina MiSeq	FR1	CH1	IGHM
SRR3099391	Male	PBMC	Multiplex	HBV	22	2×250	Illumina MiSeq	FR1	CH1	IGHM
SRR3099392	Female	PBMC	Multiplex	HBV	25	2×250	Illumina MiSeq	FR1	CH1	IGHG
SRR3099393	Female	PBMC	Multiplex	HBV	25	2×250	Illumina MiSeq	FR1	CH1	IGHG, IGHM
SRR3099394	Female	PBMC	Multiplex	HBV	25	2×250	Illumina MiSeq	FR1	CH1	IGHG
SRR3099395	Female	PBMC	Multiplex	HBV	25	2×250	Illumina MiSeq	FR1	CH1	IGHG
SRR3099396	Female	PBMC	Multiplex	HBV	27	2×250	Illumina MiSeq	FR1	CH1	IGHG
SRR3099397	Female	PBMC	Multiplex	HBV	25	2×250	Illumina MiSeq	FR1	CH1	IGHM
SRR3099398	Female	PBMC	Multiplex	HBV	25	2×250	Illumina MiSeq	FR1	CH1	IGHM
SRR3099399	Female	PBMC	Multiplex	HBV	25	2×250	Illumina MiSeq	FR1	CH1	IGHM
SRR3099400	Female	PBMC	Multiplex	HBV	25	2×250	Illumina MiSeq	FR1	CH1	IGHM
SRR3099401	Female	PBMC	Multiplex	HBV	51	2×250	Illumina MiSeq	FR1	CH1	IGHG
SRR3099402	Female	PBMC	Multiplex	HBV	51	2×250	Illumina MiSeq	FR1	CH1	IGHG
SRR3099403	Female	PBMC	Multiplex	HBV	51	2×250	Illumina MiSeq	FR1	CH1	IGHG
SRR3099404	Female	PBMC	Multiplex	HBV	51	2×250	Illumina MiSeq	FR1	CH1	IGHG
SRR3099405	Female	PBMC	Multiplex	HBV	51	2×250	Illumina MiSeq	FR1	CH1	IGHM
SRR3099406	Female	PBMC	Multiplex	HBV	51	2×250	Illumina MiSeq	FR1	CH1	IGHM
SRR3099407	Female	PBMC	Multiplex	HBV	27	2×250	Illumina MiSeq	FR1	CH1	IGHG
SRR3099408	Female	PBMC	Multiplex	HBV	51	2×250	Illumina MiSeq	FR1	CH1	IGHM
SRR3099409	Female	PBMC	Multiplex	HBV	51	2×250	Illumina MiSeq	FR1	CH1	IGHM
SRR3099418	Female	PBMC	Multiplex	HBV	27	2×250	Illumina MiSeq	FR1	CH1	IGHM
SRR3099429	Female	PBMC	Multiplex	HBV	27	2×250	Illumina MiSeq	FR1	CH1	IGHM
SRR3099440	Female	PBMC	Multiplex	HBV	27	2×250	Illumina MiSeq	FR1	CH1	IGHM
SRR3099451	Female	PBMC	Multiplex	HBV	27	2×250	Illumina MiSeq	FR1	CH1	IGHM
SRR3099462	Male	PBMC	Multiplex	HBV	22	2×250	Illumina MiSeq	FR1	CH1	IGHG
SRR3099473	Male	PBMC	Multiplex	HBV	22	2×250	Illumina MiSeq	FR1	CH1	IGHG
SRR3350720	Unknown	PBMC	RACE	Healthy	Unknown	350+280	Illumina MiSeq	Unavailable	CH1	None
SRR3350721	Unknown	PBMC	RACE	Healthy	Unknown	350+280	Illumina MiSeq	Unavailable	CH1	None
SRR3350722	Unknown	PBMC	RACE	Healthy	Unknown	350+280	Illumina MiSeq	Unavailable	CH1	None
SRR3350723	Unknown	PBMC	RACE	Healthy	Unknown	350+280	Illumina MiSeq	Unavailable	CH1	None
SRR3350724	Unknown	PBMC	RACE	Healthy	Unknown	350+280	Illumina MiSeq	Unavailable	CH1	None
SRR3350725	Unknown	PBMC	RACE	Healthy	Unknown	350+280	Illumina MiSeq	Unavailable	CH1	None
SRR3608774	Unknown	PBMC	Multiplex	Healthy	Unknown	2×300	Illumina MiSeq	FR1	Unknown	None
SRR3608775	Unknown	PBMC	Multiplex	Influenza	Unknown	2×300	Illumina MiSeq	FR1	Unknown	None
SRR3608776	Unknown	PBMC	Multiplex	Influenza	Unknown	2×300	Illumina MiSeq	FR1	Unknown	None
SRR3608777	Unknown	PBMC	Multiplex	Influenza	Unknown	2×300	Illumina MiSeq	FR1	Unknown	None
SRR3608778	Unknown	PBMC	Multiplex	Influenza	Unknown	2×300	Illumina MiSeq	FR1	Unknown	None
SRR3620024	Unknown	PBMC	Multiplex	Healthy	Unknown	2×300	Illumina MiSeq	FR1	CH1	IGHG, IGHA, IGHM
SRR3620025	Unknown	PBMC	Multiplex	Healthy	Unknown	2×300	Illumina MiSeq	FR1	CH1	IGHG, IGHM, IGHA
SRR3620027	Unknown	PBMC	Multiplex	Influenza	Unknown	2×300	Illumina MiSeq	FR1	CH1	IGHG, IGHM, IGHA
SRR3620028	Unknown	PBMC	Multiplex	Influenza	Unknown	2×300	Illumina MiSeq	FR1	CH1	IGHG
SRR3620029	Unknown	PBMC	Multiplex	Influenza	Unknown	2×300	Illumina MiSeq	FR1	CH1	IGHG, IGHA, IGHM
SRR3620030	Unknown	PBMC	Multiplex	Influenza	Unknown	2×300	Illumina MiSeq	FR1	CH1	IGHM, IGHG, IGHA
SRR3620033	Unknown	PBMC	Multiplex	Healthy	Unknown	2×300	Illumina MiSeq	FR1	CH1	IGHG, IGHM, IGHA
SRR3620034	Unknown	PBMC	Multiplex	Healthy	Unknown	2×300	Illumina MiSeq	FR1	CH1	IGHM, IGHG, IGHA
SRR3620035	Unknown	PBMC	Multiplex	Healthy	Unknown	2×300	Illumina MiSeq	FR1	CH1	IGHM
SRR3620036	Unknown	PBMC	Multiplex	Healthy	Unknown	2×300	Illumina MiSeq	FR1	CH1	IGHM
SRR3620041	Unknown	PBMC	Multiplex	Influenza	Unknown	2×300	Illumina MiSeq	FR1	CH1	IGHG, IGHM, IGHA
SRR3620042	Unknown	PBMC	Multiplex	Influenza	Unknown	2×300	Illumina MiSeq	FR1	CH1	IGHG
SRR3620043	Unknown	PBMC	Multiplex	Influenza	Unknown	2×300	Illumina MiSeq	FR1	CH1	IGHG
SRR3620044	Unknown	PBMC	Multiplex	Influenza	Unknown	2×300	Illumina MiSeq	FR1	CH1	IGHM, IGHG, IGHA
SRR3620045	Unknown	PBMC	Multiplex	Influenza	Unknown	2×300	Illumina MiSeq	FR1	CH1	IGHM, IGHG, IGHA
SRR3620047	Unknown	PBMC	Multiplex	Influenza	Unknown	2×300	Illumina MiSeq	FR1	CH1	IGHG
SRR3620048	Unknown	PBMC	Multiplex	Influenza	Unknown	2×300	Illumina MiSeq	FR1	CH1	IGHG
SRR3620049	Unknown	PBMC	Multiplex	Influenza	Unknown	2×300	Illumina MiSeq	FR1	CH1	IGHM, IGHG, IGHA
SRR3620052	Unknown	PBMC	Multiplex	Healthy	Unknown	2×300	Illumina MiSeq	FR1	CH1	IGHA, IGHG, IGHM
SRR3620053	Unknown	PBMC	Multiplex	Healthy	Unknown	2×300	Illumina MiSeq	FR1	CH1	IGHM, IGHG, IGHA
SRR3620054	Unknown	PBMC	Multiplex	Healthy	Unknown	2×300	Illumina MiSeq	FR1	CH1	IGHD
SRR3620055	Unknown	PBMC	Multiplex	Influenza	Unknown	2×300	Illumina MiSeq	FR1	CH1	IGHG
SRR3620056	Unknown	PBMC	Multiplex	Influenza	Unknown	2×300	Illumina MiSeq	FR1	CH1	IGHA, IGHG
SRR3620059	Unknown	PBMC	Multiplex	Influenza	Unknown	2×300	Illumina MiSeq	FR1	CH1	IGHG, IGHA, IGHM
SRR3620060	Unknown	PBMC	Multiplex	Influenza	Unknown	2×300	Illumina MiSeq	FR1	CH1	IGHM, IGHA, IGHG
SRR3620061	Unknown	PBMC	Multiplex	Influenza	Unknown	2×300	Illumina MiSeq	FR1	CH1	IGHG
SRR3620062	Unknown	PBMC	Multiplex	Influenza	Unknown	2×300	Illumina MiSeq	FR1	CH1	IGHG, IGHA
SRR3620063	Unknown	PBMC	Multiplex	Influenza	Unknown	2×300	Illumina MiSeq	FR1	CH1	IGHG
SRR3620064	Unknown	PBMC	Multiplex	Influenza	Unknown	2×300	Illumina MiSeq	FR1	CH1	IGHM, IGHG, IGHA
SRR3620066	Unknown	PBMC	Multiplex	Influenza	Unknown	2×300	Illumina MiSeq	FR1	CH1	IGHA, IGHG
SRR3620067	Unknown	PBMC	Multiplex	Influenza	Unknown	2×300	Illumina MiSeq	FR1	CH1	IGHM, IGHA, IGHG
SRR3620069	Unknown	PBMC	Multiplex	Influenza	Unknown	2×300	Illumina MiSeq	FR1	CH1	IGHG
SRR3620074	Unknown	PBMC	Multiplex	Influenza	Unknown	2×300	Illumina MiSeq	FR1	CH1	IGHG, IGHA
SRR3620075	Unknown	PBMC	Multiplex	Influenza	Unknown	2×300	Illumina MiSeq	FR1	CH1	IGHG, IGHA
SRR3620076	Unknown	PBMC	Multiplex	Influenza	Unknown	2×300	Illumina MiSeq	FR1	CH1	IGHG
SRR3620077	Unknown	PBMC	Multiplex	Influenza	Unknown	2×300	Illumina MiSeq	FR1	CH1	IGHG
SRR3620078	Unknown	PBMC	Multiplex	Influenza	Unknown	2×300	Illumina MiSeq	FR1	CH1	IGHM, IGHG, IGHA
SRR3620079	Unknown	PBMC	Multiplex	Influenza	Unknown	2×300	Illumina MiSeq	FR1	CH1	IGHG
SRR3620081	Unknown	PBMC	Multiplex	Influenza	Unknown	2×300	Illumina MiSeq	FR1	CH1	IGHG
SRR3620083	Unknown	PBMC	Multiplex	Influenza	Unknown	2×300	Illumina MiSeq	FR1	CH1	IGHM, IGHA, IGHG
SRR3620085	Unknown	PBMC	Multiplex	Influenza	Unknown	2×300	Illumina MiSeq	FR1	CH1	IGHA, IGHG
SRR3620086	Unknown	PBMC	Multiplex	Influenza	Unknown	2×300	Illumina MiSeq	FR1	CH1	IGHM, IGHA, IGHG
SRR3620091	Unknown	PBMC	Multiplex	Influenza	Unknown	2×300	Illumina MiSeq	FR1	CH1	IGHM, IGHG, IGHA
SRR3620102	Unknown	PBMC	Multiplex	Influenza	Unknown	2×300	Illumina MiSeq	FR1	CH1	IGHG
SRR3620113	Unknown	PBMC	Multiplex	Influenza	Unknown	2×300	Illumina MiSeq	FR1	CH1	IGHG
SRR3620031	Unknown	PBMC	Multiplex	Influenza	Unknown	2×300	Illumina MiSeq	FR1	CH1	IGHM, IGHA, IGHG
SRR3620032	Unknown	PBMC	Multiplex	Influenza	Unknown	2×300	Illumina MiSeq	FR1	CH1	IGHG, IGHA
SRR3620050	Unknown	PBMC	Multiplex	Influenza	Unknown	2×300	Illumina MiSeq	FR1	CH1	IGHM, IGHG, IGHA
SRR3620051	Unknown	PBMC	Multiplex	Influenza	Unknown	2×300	Illumina MiSeq	FR1	CH1	IGHG, IGHM
SRR3620068	Unknown	PBMC	Multiplex	Influenza	Unknown	2×300	Illumina MiSeq	FR1	CH1	IGHG
SRR3620070	Unknown	PBMC	Multiplex	Influenza	Unknown	2×300	Illumina MiSeq	FR1	CH1	IGHG, IGHA, IGHM
SRR3620087	Unknown	PBMC	Multiplex	Influenza	Unknown	2×300	Illumina MiSeq	FR1	CH1	IGHG, IGHA
SRR3620088	Unknown	PBMC	Multiplex	Influenza	Unknown	2×300	Illumina MiSeq	FR1	CH1	IGHM, IGHG, IGHA
SRR3620089	Unknown	PBMC	Multiplex	Healthy	Unknown	2×300	Illumina MiSeq	FR1	CH1	IGHM, IGHD, IGHG, IGHA
SRR3620090	Unknown	PBMC	Multiplex	Influenza	Unknown	2×300	Illumina MiSeq	FR1	CH1	IGHD, IGHM, IGHG, IGHA, IGHE
SRR3620092	Unknown	PBMC	Multiplex	Influenza	Unknown	2×300	Illumina MiSeq	FR1	CH1	IGHM, IGHD, IGHG, IGHA
SRR3620093	Unknown	PBMC	Multiplex	Influenza	Unknown	2×300	Illumina MiSeq	FR1	CH1	IGHG, IGHA, IGHM
SRR3620094	Unknown	PBMC	Multiplex	Influenza	Unknown	2×300	Illumina MiSeq	FR1	CH1	IGHG, IGHA, IGHM
SRR3620095	Unknown	PBMC	Multiplex	Influenza	Unknown	2×300	Illumina MiSeq	FR1	CH1	IGHM
SRR3620098	Unknown	PBMC	Multiplex	Healthy	Unknown	2×300	Illumina MiSeq	FR1	CH1	IGHM, IGHD, IGHA, IGHG, IGHE
SRR3620099	Unknown	PBMC	Multiplex	Influenza	Unknown	2×300	Illumina MiSeq	FR1	CH1	IGHD, IGHM, IGHA, IGHG
SRR3620100	Unknown	PBMC	Multiplex	Influenza	Unknown	2×300	Illumina MiSeq	FR1	CH1	IGHD, IGHM, IGHG, IGHA, IGHE
SRR3620104	Unknown	PBMC	Multiplex	Influenza	Unknown	2×300	Illumina MiSeq	FR1	CH1	IGHM
SRR3620106	Unknown	PBMC	Multiplex	Influenza	Unknown	2×300	Illumina MiSeq	FR1	CH1	IGHG
SRR3620107	Unknown	PBMC	Multiplex	Healthy	Unknown	2×300	Illumina MiSeq	FR1	CH1	IGHM, IGHD, IGHG, IGHA
SRR3620108	Unknown	PBMC	Multiplex	Influenza	Unknown	2×300	Illumina MiSeq	FR1	CH1	IGHM, IGHD, IGHG, IGHA
SRR3620109	Unknown	PBMC	Multiplex	Influenza	Unknown	2×300	Illumina MiSeq	FR1	CH1	IGHD, IGHM, IGHG, IGHA
SRR3620110	Unknown	PBMC	Multiplex	Influenza	Unknown	2×300	Illumina MiSeq	FR1	CH1	IGHG, IGHA, IGHM
SRR3620111	Unknown	PBMC	Multiplex	Influenza	Unknown	2×300	Illumina MiSeq	FR1	CH1	IGHG, IGHA, IGHM
SRR3620116	Unknown	PBMC	Multiplex	Healthy	Unknown	2×300	Illumina MiSeq	FR1	CH1	IGHM, IGHG, IGHD, IGHA
SRR3620117	Unknown	PBMC	Multiplex	Influenza	Unknown	2×300	Illumina MiSeq	FR1	CH1	IGHM, IGHA, IGHD, IGHG
SRR3620118	Unknown	PBMC	Multiplex	Influenza	Unknown	2×300	Illumina MiSeq	FR1	CH1	IGHM, IGHD, IGHG, IGHA
SRR3620121	Unknown	PBMC	Multiplex	Influenza	Unknown	2×300	Illumina MiSeq	FR1	CH1	IGHM
SRR3620123	Unknown	PBMC	Multiplex	Influenza	Unknown	2×300	Illumina MiSeq	FR1	CH1	IGHG
SRR3990822	Unknown	PBMC	Multiplex	Meningitis	Unknown	2×250	Illumina MiSeq	FR1	CH1	IGHG
SRR3990823	Unknown	PBMC	Multiplex	Meningitis	Unknown	2×250	Illumina MiSeq	FR1	CH1	IGHG
SRR3990825	Unknown	PBMC	Multiplex	Meningitis	Unknown	2×250	Illumina MiSeq	FR1	CH1	IGHM
SRR3990826	Unknown	PBMC	Multiplex	Meningitis	Unknown	2×250	Illumina MiSeq	FR1	CH1	IGHM
SRR3990828	Unknown	PBMC	Multiplex	Meningitis	Unknown	2×250	Illumina MiSeq	FR1	CH1	IGHG
SRR3990829	Unknown	PBMC	Multiplex	Meningitis	Unknown	2×250	Illumina MiSeq	FR1	CH1	IGHM
SRR3990830	Unknown	PBMC	Multiplex	Meningitis	Unknown	2×250	Illumina MiSeq	FR1	CH1	IGHM
SRR3990831	Unknown	PBMC	Multiplex	Healthy	Unknown	2×250	Illumina MiSeq	FR1	CH1	IGHM
SRR3990832	Unknown	PBMC	Multiplex	Healthy	Unknown	2×250	Illumina MiSeq	FR1	CH1	IGHM
SRR3990833	Unknown	PBMC	Multiplex	Healthy	Unknown	2×250	Illumina MiSeq	FR1	CH1	IGHM
SRR3990834	Unknown	PBMC	Multiplex	Meningitis	Unknown	2×250	Illumina MiSeq	FR1	CH1	IGHM
SRR3990835	Unknown	PBMC	Multiplex	Healthy	Unknown	2×250	Illumina MiSeq	FR1	CH1	IGHG
SRR3990836	Unknown	PBMC	Multiplex	Meningitis	Unknown	2×250	Illumina MiSeq	FR1	CH1	IGHG
SRR3990837	Unknown	PBMC	Multiplex	Meningitis	Unknown	2×250	Illumina MiSeq	FR1	CH1	IGHG
SRR3990838	Unknown	PBMC	Multiplex	Meningitis	Unknown	2×250	Illumina MiSeq	FR1	CH1	IGHG
SRR3990839	Unknown	PBMC	Multiplex	Meningitis	Unknown	2×250	Illumina MiSeq	FR1	CH1	IGHM
SRR3990840	Unknown	PBMC	Multiplex	Meningitis	Unknown	2×250	Illumina MiSeq	FR1	CH1	IGHM
SRR3990841	Unknown	PBMC	Multiplex	Healthy	Unknown	2×250	Illumina MiSeq	FR1	CH1	IGHM
SRR3990842	Unknown	PBMC	Multiplex	Healthy	Unknown	2×250	Illumina MiSeq	FR1	CH1	IGHM
SRR3990843	Unknown	PBMC	Multiplex	Healthy	Unknown	2×250	Illumina MiSeq	FR1	CH1	IGHM
SRR3990844	Unknown	PBMC	Multiplex	Healthy	Unknown	2×250	Illumina MiSeq	FR1	CH1	IGHG
SRR3990845	Unknown	PBMC	Multiplex	Meningitis	Unknown	2×250	Illumina MiSeq	FR1	CH1	IGHM
SRR3990846	Unknown	PBMC	Multiplex	Meningitis	Unknown	2×250	Illumina MiSeq	FR1	CH1	IGHG
SRR3990847	Unknown	PBMC	Multiplex	Meningitis	Unknown	2×250	Illumina MiSeq	FR1	CH1	IGHG
SRR3990848	Unknown	PBMC	Multiplex	Meningitis	Unknown	2×250	Illumina MiSeq	FR1	CH1	IGHG
SRR3990849	Unknown	PBMC	Multiplex	Meningitis	Unknown	2×250	Illumina MiSeq	FR1	CH1	IGHM
SRR3990850	Unknown	PBMC	Multiplex	Meningitis	Unknown	2×250	Illumina MiSeq	FR1	CH1	IGHM
SRR3990851	Unknown	PBMC	Multiplex	Healthy	Unknown	2×250	Illumina MiSeq	FR1	CH1	IGHM
SRR3990852	Unknown	PBMC	Multiplex	Healthy	Unknown	2×250	Illumina MiSeq	FR1	CH1	IGHM
SRR3990853	Unknown	PBMC	Multiplex	Healthy	Unknown	2×250	Illumina MiSeq	FR1	CH1	IGHM
SRR3990854	Unknown	PBMC	Multiplex	Healthy	Unknown	2×250	Illumina MiSeq	FR1	CH1	IGHG
SRR3990855	Unknown	PBMC	Multiplex	Meningitis	Unknown	2×250	Illumina MiSeq	FR1	CH1	IGHG
SRR3990856	Unknown	PBMC	Multiplex	Meningitis	Unknown	2×250	Illumina MiSeq	FR1	CH1	IGHM
SRR3990869	Unknown	PBMC	Multiplex	Meningitis	Unknown	2×250	Illumina MiSeq	FR1	CH1	IGHG
SRR3990870	Unknown	PBMC	Multiplex	Meningitis	Unknown	2×250	Illumina MiSeq	FR1	CH1	IGHG
SRR3990871	Unknown	PBMC	Multiplex	Meningitis	Unknown	2×250	Illumina MiSeq	FR1	CH1	IGHM
SRR3990872	Unknown	PBMC	Multiplex	Meningitis	Unknown	2×250	Illumina MiSeq	FR1	CH1	IGHM
SRR3990873	Unknown	PBMC	Multiplex	Meningitis	Unknown	2×250	Illumina MiSeq	FR1	CH1	IGHM
SRR3990874	Unknown	PBMC	Multiplex	Meningitis	Unknown	2×250	Illumina MiSeq	FR1	CH1	IGHM
SRR3990875	Unknown	PBMC	Multiplex	Meningitis	Unknown	2×250	Illumina MiSeq	FR1	CH1	IGHM
SRR3990876	Unknown	PBMC	Multiplex	Meningitis	Unknown	2×250	Illumina MiSeq	FR1	CH1	IGHG
SRR3990877	Unknown	PBMC	Multiplex	Meningitis	Unknown	2×250	Illumina MiSeq	FR1	CH1	IGHG
SRR3990878	Unknown	PBMC	Multiplex	Meningitis	Unknown	2×250	Illumina MiSeq	FR1	CH1	IGHG
SRR3990879	Unknown	PBMC	Multiplex	Meningitis	Unknown	2×250	Illumina MiSeq	FR1	CH1	IGHM
SRR3990880	Unknown	PBMC	Multiplex	Meningitis	Unknown	2×250	Illumina MiSeq	FR1	CH1	IGHG
SRR3990881	Unknown	PBMC	Multiplex	Meningitis	Unknown	2×250	Illumina MiSeq	FR1	CH1	IGHM
SRR3990882	Unknown	PBMC	Multiplex	Meningitis	Unknown	2×250	Illumina MiSeq	FR1	CH1	IGHM
SRR3990883	Unknown	PBMC	Multiplex	Healthy	Unknown	2×250	Illumina MiSeq	FR1	CH1	IGHM
SRR3990884	Unknown	PBMC	Multiplex	Healthy	Unknown	2×250	Illumina MiSeq	FR1	CH1	IGHM
SRR3990885	Unknown	PBMC	Multiplex	Healthy	Unknown	2×250	Illumina MiSeq	FR1	CH1	IGHM
SRR3990886	Unknown	PBMC	Multiplex	Healthy	Unknown	2×250	Illumina MiSeq	FR1	CH1	IGHG
SRR3990887	Unknown	PBMC	Multiplex	Meningitis	Unknown	2×250	Illumina MiSeq	FR1	CH1	IGHG
SRR3990888	Unknown	PBMC	Multiplex	Meningitis	Unknown	2×250	Illumina MiSeq	FR1	CH1	IGHG
SRR3990889	Unknown	PBMC	Multiplex	Meningitis	Unknown	2×250	Illumina MiSeq	FR1	CH1	IGHG
SRR3990890	Unknown	PBMC	Multiplex	Meningitis	Unknown	2×250	Illumina MiSeq	FR1	CH1	IGHM
SRR3990891	Unknown	PBMC	Multiplex	Meningitis	Unknown	2×250	Illumina MiSeq	FR1	CH1	IGHM
SRR3990892	Unknown	PBMC	Multiplex	Meningitis	Unknown	2×250	Illumina MiSeq	FR1	CH1	IGHM
SRR3990893	Unknown	PBMC	Multiplex	Healthy	Unknown	2×250	Illumina MiSeq	FR1	CH1	IGHM
SRR3990894	Unknown	PBMC	Multiplex	Healthy	Unknown	2×250	Illumina MiSeq	FR1	CH1	IGHM
SRR3990895	Unknown	PBMC	Multiplex	Healthy	Unknown	2×250	Illumina MiSeq	FR1	CH1	IGHM
SRR3990896	Unknown	PBMC	Multiplex	Healthy	Unknown	2×250	Illumina MiSeq	FR1	CH1	IGHG
SRR3990897	Unknown	PBMC	Multiplex	Meningitis	Unknown	2×250	Illumina MiSeq	FR1	CH1	IGHG
SRR3990898	Unknown	PBMC	Multiplex	Meningitis	Unknown	2×250	Illumina MiSeq	FR1	CH1	IGHG
SRR3990899	Unknown	PBMC	Multiplex	Meningitis	Unknown	2×250	Illumina MiSeq	FR1	CH1	IGHG
SRR3990900	Unknown	PBMC	Multiplex	Meningitis	Unknown	2×250	Illumina MiSeq	FR1	CH1	IGHM
SRR3990901	Unknown	PBMC	Multiplex	Meningitis	Unknown	2×250	Illumina MiSeq	FR1	CH1	IGHG
SRR3990902	Unknown	PBMC	Multiplex	Meningitis	Unknown	2×250	Illumina MiSeq	FR1	CH1	IGHM
SRR3990903	Unknown	PBMC	Multiplex	Meningitis	Unknown	2×250	Illumina MiSeq	FR1	CH1	IGHM
SRR3990904	Unknown	PBMC	Multiplex	Meningitis	Unknown	2×250	Illumina MiSeq	FR1	CH1	IGHM
SRR3990905	Unknown	PBMC	Multiplex	Meningitis	Unknown	2×250	Illumina MiSeq	FR1	CH1	IGHM
SRR3990906	Unknown	PBMC	Multiplex	Meningitis	Unknown	2×250	Illumina MiSeq	FR1	CH1	IGHG
SRR3990907	Unknown	PBMC	Multiplex	Meningitis	Unknown	2×250	Illumina MiSeq	FR1	CH1	IGHG
SRR3990908	Unknown	PBMC	Multiplex	Meningitis	Unknown	2×250	Illumina MiSeq	FR1	CH1	IGHG
SRR3990909	Unknown	PBMC	Multiplex	Meningitis	Unknown	2×250	Illumina MiSeq	FR1	CH1	IGHG
SRR3990910	Unknown	PBMC	Multiplex	Meningitis	Unknown	2×250	Illumina MiSeq	FR1	CH1	IGHM
SRR3990911	Unknown	PBMC	Multiplex	Meningitis	Unknown	2×250	Illumina MiSeq	FR1	CH1	IGHM
SRR3990912	Unknown	PBMC	Multiplex	Meningitis	Unknown	2×250	Illumina MiSeq	FR1	CH1	IGHG
SRR3990913	Unknown	PBMC	Multiplex	Meningitis	Unknown	2×250	Illumina MiSeq	FR1	CH1	IGHM
SRR3990914	Unknown	PBMC	Multiplex	Meningitis	Unknown	2×250	Illumina MiSeq	FR1	CH1	IGHM
SRR3990915	Unknown	PBMC	Multiplex	Meningitis	Unknown	2×250	Illumina MiSeq	FR1	CH1	IGHM
SRR3990916	Unknown	PBMC	Multiplex	Meningitis	Unknown	2×250	Illumina MiSeq	FR1	CH1	IGHG
SRR3990917	Unknown	PBMC	Multiplex	Meningitis	Unknown	2×250	Illumina MiSeq	FR1	CH1	IGHG
SRR3990918	Unknown	PBMC	Multiplex	Meningitis	Unknown	2×250	Illumina MiSeq	FR1	CH1	IGHG
SRR3992895	Unknown	PBMC	Multiplex	Influenza	Unknown	2×300	Illumina MiSeq	FR1	CH1	IGHG
SRR3992896	Unknown	PBMC	Multiplex	Influenza	Unknown	2×300	Illumina MiSeq	FR1	CH1	IGHG
SRR3992897	Unknown	PBMC	Multiplex	Influenza	Unknown	2×300	Illumina MiSeq	FR1	CH1	IGHG
SRR3992898	Unknown	PBMC	Multiplex	Influenza	Unknown	2×300	Illumina MiSeq	FR1	CH1	IGHG
SRR3992899	Unknown	PBMC	Multiplex	Influenza	Unknown	2×300	Illumina MiSeq	FR1	CH1	IGHG
SRR3992900	Unknown	PBMC	Multiplex	Influenza	Unknown	2×300	Illumina MiSeq	FR1	CH1	IGHG
SRR3992901	Unknown	PBMC	Multiplex	Influenza	Unknown	2×300	Illumina MiSeq	FR1	CH1	IGHG
SRR3992902	Unknown	PBMC	Multiplex	Influenza	Unknown	2×300	Illumina MiSeq	FR1	CH1	IGHG
SRR3992903	Unknown	PBMC	Multiplex	Influenza	Unknown	2×300	Illumina MiSeq	FR1	CH1	IGHG
SRR3992904	Unknown	PBMC	Multiplex	Influenza	Unknown	2×300	Illumina MiSeq	FR1	CH1	IGHG
SRR3992905	Unknown	PBMC	Multiplex	Influenza	Unknown	2×300	Illumina MiSeq	FR1	CH1	IGHG
SRR3992906	Unknown	PBMC	Multiplex	Influenza	Unknown	2×300	Illumina MiSeq	FR1	CH1	IGHG
SRR3992907	Unknown	PBMC	Multiplex	Influenza	Unknown	2×300	Illumina MiSeq	FR1	CH1	IGHG
SRR3992908	Unknown	PBMC	Multiplex	Influenza	Unknown	2×300	Illumina MiSeq	FR1	CH1	IGHG
SRR3992909	Unknown	PBMC	Multiplex	Influenza	Unknown	2×300	Illumina MiSeq	FR1	CH1	IGHG
SRR3992910	Unknown	PBMC	Multiplex	Influenza	Unknown	2×300	Illumina MiSeq	FR1	CH1	IGHG
SRR3992911	Unknown	PBMC	Multiplex	Influenza	Unknown	2×300	Illumina MiSeq	FR1	CH1	IGHG
SRR3992912	Unknown	PBMC	Multiplex	Influenza	Unknown	2×300	Illumina MiSeq	FR1	CH1	IGHG
SRR3992913	Unknown	PBMC	Multiplex	Influenza	Unknown	2×300	Illumina MiSeq	FR1	CH1	IGHG
SRR3992914	Unknown	PBMC	Multiplex	Influenza	Unknown	2×300	Illumina MiSeq	FR1	CH1	IGHG
SRR3992915	Unknown	PBMC	Multiplex	Influenza	Unknown	2×300	Illumina MiSeq	FR1	CH1	IGHG
SRR3992916	Unknown	PBMC	Multiplex	Influenza	Unknown	2×300	Illumina MiSeq	FR1	CH1	IGHG
SRR3992917	Unknown	PBMC	Multiplex	Influenza	Unknown	2×300	Illumina MiSeq	FR1	CH1	IGHG
SRR3992918	Unknown	PBMC	Multiplex	Influenza	Unknown	2×300	Illumina MiSeq	FR1	CH1	IGHG
SRR3992919	Unknown	PBMC	Multiplex	Influenza	Unknown	2×300	Illumina MiSeq	FR1	CH1	IGHG
SRR3992920	Unknown	PBMC	Multiplex	Influenza	Unknown	2×300	Illumina MiSeq	FR1	CH1	IGHG
SRR3992921	Unknown	PBMC	Multiplex	Influenza	Unknown	2×300	Illumina MiSeq	FR1	CH1	IGHG
SRR3992922	Unknown	PBMC	Multiplex	Influenza	Unknown	2×300	Illumina MiSeq	FR1	CH1	IGHG
SRR3992923	Unknown	PBMC	Multiplex	Influenza	Unknown	2×300	Illumina MiSeq	FR1	CH1	IGHG
SRR3992924	Unknown	PBMC	Multiplex	Influenza	Unknown	2×300	Illumina MiSeq	FR1	CH1	IGHG
SRR3992925	Unknown	PBMC	Multiplex	Influenza	Unknown	2×300	Illumina MiSeq	FR1	CH1	IGHG
SRR3992926	Unknown	PBMC	Multiplex	Influenza	Unknown	2×300	Illumina MiSeq	FR1	CH1	IGHG
SRR3992927	Unknown	PBMC	Multiplex	Influenza	Unknown	2×300	Illumina MiSeq	FR1	CH1	IGHG
SRR3992928	Unknown	PBMC	Multiplex	Influenza	Unknown	2×300	Illumina MiSeq	FR1	CH1	IGHG
SRR3992929	Unknown	PBMC	Multiplex	Influenza	Unknown	2×300	Illumina MiSeq	FR1	CH1	IGHG
SRR3992930	Unknown	PBMC	Multiplex	Influenza	Unknown	2×300	Illumina MiSeq	FR1	CH1	IGHG
SRR3992931	Unknown	PBMC	Multiplex	Influenza	Unknown	2×300	Illumina MiSeq	FR1	CH1	IGHG
SRR3992932	Unknown	PBMC	Multiplex	Influenza	Unknown	2×300	Illumina MiSeq	FR1	CH1	IGHG
SRR3992933	Unknown	PBMC	Multiplex	Influenza	Unknown	2×300	Illumina MiSeq	FR1	CH1	IGHG
SRR3992934	Unknown	PBMC	Multiplex	Influenza	Unknown	2×300	Illumina MiSeq	FR1	CH1	IGHG
SRR3992935	Unknown	PBMC	Multiplex	Influenza	Unknown	2×300	Illumina MiSeq	FR1	CH1	IGHG
SRR3992936	Unknown	PBMC	Multiplex	Influenza	Unknown	2×300	Illumina MiSeq	FR1	CH1	IGHG
SRR3992937	Unknown	PBMC	Multiplex	Influenza	Unknown	2×300	Illumina MiSeq	FR1	CH1	IGHG
SRR3992938	Unknown	PBMC	Multiplex	Influenza	Unknown	2×300	Illumina MiSeq	FR1	CH1	IGHG
SRR3992939	Unknown	PBMC	Multiplex	Influenza	Unknown	2×300	Illumina MiSeq	FR1	CH1	IGHG
SRR3992940	Unknown	PBMC	Multiplex	Influenza	Unknown	2×300	Illumina MiSeq	FR1	CH1	IGHG
SRR3992941	Unknown	PBMC	Multiplex	Influenza	Unknown	2×300	Illumina MiSeq	FR1	CH1	IGHG
SRR3992942	Unknown	PBMC	Multiplex	Influenza	Unknown	2×300	Illumina MiSeq	FR1	CH1	IGHG
SRR3992943	Unknown	PBMC	Multiplex	Influenza	Unknown	2×300	Illumina MiSeq	FR1	CH1	IGHG
SRR3992944	Unknown	PBMC	Multiplex	Influenza	Unknown	2×300	Illumina MiSeq	FR1	CH1	IGHG
SRR3992945	Unknown	PBMC	Multiplex	Influenza	Unknown	2×300	Illumina MiSeq	FR1	CH1	IGHG
SRR3992946	Unknown	PBMC	Multiplex	Influenza	Unknown	2×300	Illumina MiSeq	FR1	CH1	IGHG
SRR3992947	Unknown	PBMC	Multiplex	Influenza	Unknown	2×300	Illumina MiSeq	FR1	CH1	IGHG
SRR3992948	Unknown	PBMC	Multiplex	Influenza	Unknown	2×300	Illumina MiSeq	FR1	CH1	IGHG
SRR3992949	Unknown	PBMC	Multiplex	Influenza	Unknown	2×300	Illumina MiSeq	FR1	CH1	IGHG
SRR3992950	Unknown	PBMC	Multiplex	Influenza	Unknown	2×300	Illumina MiSeq	FR1	CH1	IGHG
SRR3992951	Unknown	PBMC	Multiplex	Influenza	Unknown	2×300	Illumina MiSeq	FR1	CH1	IGHG
SRR3992952	Unknown	PBMC	Multiplex	Influenza	Unknown	2×300	Illumina MiSeq	FR1	CH1	IGHG
SRR4242041	Male	PBMC	Multiplex	Healthy	42	2×300	Illumina MiSeq	FR1	CH1	IGHM, IGHG, IGHA
SRR4242042	Male	PBMC	Multiplex	Healthy	42	2×300	Illumina MiSeq	FR1	CH1	IGHM, IGHG, IGHA
SRR4242043	Male	PBMC	Multiplex	Healthy	42	2×300	Illumina MiSeq	FR1	CH1	IGHM, IGHG, IGHA
SRR4242047	Male	PBMC	Multiplex	Healthy	53	2×300	Illumina MiSeq	FR1	CH1	IGHM, IGHG, IGHA
SRR4242049	Male	PBMC	Multiplex	Healthy	53	2×300	Illumina MiSeq	FR1	CH1	IGHM, IGHA, IGHG
SRR4242052	Male	PBMC	Multiplex	Healthy	53	2×300	Illumina MiSeq	FR1	CH1	IGHM, IGHG, IGHA
SRR4242054	Unknown	PBMC	Multiplex	Healthy	Unknown	2×300	Illumina MiSeq	FR1	CH1	IGHM, IGHG, IGHA
SRR4242055	Unknown	PBMC	Multiplex	Healthy	Unknown	2×300	Illumina MiSeq	FR1	CH1	IGHA, IGHM, IGHG
SRR4242056	Unknown	PBMC	Multiplex	Healthy	Unknown	2×300	Illumina MiSeq	FR1	CH1	IGHM, IGHG, IGHA
SRR4242057	Unknown	PBMC	Multiplex	Healthy	Unknown	2×300	Illumina MiSeq	FR1	CH1	IGHM, IGHG, IGHA
SRR4242058	Unknown	PBMC	Multiplex	Healthy	Unknown	2×300	Illumina MiSeq	FR1	CH1	IGHM, IGHA, IGHG
SRR4242060	Unknown	PBMC	Multiplex	Healthy	Unknown	2×300	Illumina MiSeq	FR1	CH1	IGHM, IGHG, IGHA
SRR4026007	Male	PBMC	RACE	Healthy	33	325+275	Illumina MiSeq	Unavailable	CH1	IGHA, IGHM, IGHG
SRR4026008	Male	PBMC	RACE	Healthy	33	325+275	Illumina MiSeq	Unavailable	CH1	IGHM, IGHA, IGHG, IGHD
SRR4026009	Male	PBMC	RACE	Healthy	31	325+275	Illumina MiSeq	Unavailable	CH1	IGHM, IGHD
SRR4026010	Male	PBMC	RACE	Healthy	31	325+275	Illumina MiSeq	Unavailable	CH1	IGHM, IGHA, IGHG
SRR4026011	Male	PBMC	RACE	Healthy	31	325+275	Illumina MiSeq	Unavailable	CH1	IGHM, IGHA, IGHG
SRR4026012	Male	PBMC	RACE	Healthy	31	325+275	Illumina MiSeq	Unavailable	CH1	IGHM, IGHD, IGHA
SRR4026013	Male	PBMC	RACE	Healthy	31	325+275	Illumina MiSeq	Unavailable	CH1	IGHM, IGHA, IGHD
SRR4026014	Male	PBMC	RACE	Healthy	31	325+275	Illumina MiSeq	Unavailable	CH1	IGHM, IGHD
SRR4026015	Female	PBMC	RACE	Healthy	31	325+275	Illumina MiSeq	Unavailable	CH1	IGHM, IGHD
SRR4026016	Female	PBMC	RACE	Healthy	31	325+275	Illumina MiSeq	Unavailable	CH1	IGHM
SRR4026017	Female	PBMC	RACE	Healthy	31	325+275	Illumina MiSeq	Unavailable	CH1	IGHM
SRR4026018	Female	PBMC	RACE	Healthy	31	325+275	Illumina MiSeq	Unavailable	CH1	IGHM, IGHA, IGHG
SRR4026019	Male	PBMC	RACE	Healthy	33	325+275	Illumina MiSeq	Unavailable	CH1	IGHM
SRR4026020	Female	PBMC	RACE	Healthy	31	325+275	Illumina MiSeq	Unavailable	CH1	IGHM, IGHD
SRR4026021	Female	PBMC	RACE	Healthy	31	325+275	Illumina MiSeq	Unavailable	CH1	IGHM, IGHA, IGHG
SRR4026022	Female	PBMC	RACE	Myasthenia gravis	31	325+275	Illumina MiSeq	Unavailable	CH1	IGHM, IGHD, IGHA
SRR4026023	Female	PBMC	RACE	Myasthenia gravis	31	325+275	Illumina MiSeq	Unavailable	CH1	IGHA, IGHM, IGHG
SRR4026024	Female	PBMC	RACE	Myasthenia gravis	31	325+275	Illumina MiSeq	Unavailable	CH1	IGHM
SRR4026025	Female	PBMC	RACE	Myasthenia gravis	31	325+275	Illumina MiSeq	Unavailable	CH1	IGHM, IGHA, IGHD, IGHG
SRR4026026	Male	PBMC	RACE	Myasthenia gravis	51	325+275	Illumina MiSeq	Unavailable	CH1	IGHA, IGHM
SRR4026027	Male	PBMC	RACE	Myasthenia gravis	51	325+275	Illumina MiSeq	Unavailable	CH1	IGHM, IGHD
SRR4026028	Male	PBMC	RACE	Myasthenia gravis	51	325+275	Illumina MiSeq	Unavailable	CH1	IGHA, IGHM, IGHG
SRR4026029	Male	PBMC	RACE	Myasthenia gravis	51	325+275	Illumina MiSeq	Unavailable	CH1	IGHM, IGHD
SRR4026030	Male	PBMC	RACE	Healthy	33	325+275	Illumina MiSeq	Unavailable	CH1	IGHA, IGHM, IGHG
SRR4026031	Female	PBMC	RACE	Myasthenia gravis	51	325+275	Illumina MiSeq	Unavailable	CH1	IGHM, IGHD, IGHG, IGHA
SRR4026032	Female	PBMC	RACE	Myasthenia gravis	51	325+275	Illumina MiSeq	Unavailable	CH1	IGHM, IGHA, IGHG, IGHD
SRR4026033	Male	PBMC	RACE	Myasthenia gravis	33	325+275	Illumina MiSeq	Unavailable	CH1	IGHM, IGHD
SRR4026034	Male	PBMC	RACE	Myasthenia gravis	33	325+275	Illumina MiSeq	Unavailable	CH1	IGHA, IGHM, IGHG, IGHD
SRR4026035	Male	PBMC	RACE	Myasthenia gravis	28	325+275	Illumina MiSeq	Unavailable	CH1	IGHM, IGHA, IGHD, IGHG
SRR4026036	Male	PBMC	RACE	Myasthenia gravis	28	325+275	Illumina MiSeq	Unavailable	CH1	IGHM, IGHD, IGHA, IGHG
SRR4026037	Female	PBMC	RACE	Myasthenia gravis	51	325+275	Illumina MiSeq	Unavailable	CH1	IGHA, IGHM
SRR4026038	Female	PBMC	RACE	Myasthenia gravis	51	325+275	Illumina MiSeq	Unavailable	CH1	IGHM, IGHD
SRR4026039	Female	PBMC	RACE	Myasthenia gravis	18	325+275	Illumina MiSeq	Unavailable	CH1	IGHM, IGHA, IGHG, IGHD
SRR4026040	Female	PBMC	RACE	Myasthenia gravis	18	325+275	Illumina MiSeq	Unavailable	CH1	IGHM, IGHD, None
SRR4026041	Male	PBMC	RACE	Healthy	31	325+275	Illumina MiSeq	Unavailable	CH1	IGHM, IGHA, IGHG
SRR4026042	Male	PBMC	RACE	Healthy	31	325+275	Illumina MiSeq	Unavailable	CH1	IGHM, IGHA, IGHG
SRR4026043	Male	PBMC	RACE	Healthy	31	325+275	Illumina MiSeq	Unavailable	CH1	IGHM, IGHD
SRR4026044	Male	PBMC	RACE	Healthy	31	325+275	Illumina MiSeq	Unavailable	CH1	IGHM, IGHD
SRR4026045	Male	PBMC	RACE	Healthy	31	325+275	Illumina MiSeq	Unavailable	CH1	IGHM, IGHA, IGHD
SRR4026046	Male	PBMC	RACE	Healthy	31	325+275	Illumina MiSeq	Unavailable	CH1	IGHM, IGHA, IGHD
SRR7230358	Female	PBMC	RACE	Myasthenia gravis	60	325+275	Illumina MiSeq	Unavailable	CH1	IGHM, IGHD, IGHA, IGHG
SRR4297077	Female	Bone marrow	Multiplex	Brain death	56	2×300	Illumina MiSeq	Leader	FR4	None
SRR4297078	Female	Intestine	Multiplex	Brain death	56	2×300	Illumina MiSeq	Leader	FR4	None
SRR4297079	Female	Intestine	Multiplex	Brain death	56	2×300	Illumina MiSeq	Leader	FR4	None
SRR4297080	Female	Intestine	Multiplex	Brain death	56	2×300	Illumina MiSeq	Leader	FR4	None
SRR4297081	Female	Lung	Multiplex	Brain death	56	2×300	Illumina MiSeq	Leader	FR4	None
SRR4297083	Female	PBMC	Multiplex	Brain death	56	2×300	Illumina MiSeq	Leader	FR4	None
SRR4297084	Female	Spleen	Multiplex	Brain death	56	2×300	Illumina MiSeq	Leader	FR4	None
SRR4297085	Male	Bone marrow	Multiplex	Brain death	46	2×300	Illumina MiSeq	Leader	FR4	None
SRR4297086	Male	Intestine	Multiplex	Brain death	46	2×300	Illumina MiSeq	Leader	FR4	None
SRR4297087	Male	Intestine	Multiplex	Brain death	46	2×300	Illumina MiSeq	Leader	FR4	None
SRR4297088	Male	Intestine	Multiplex	Brain death	46	2×300	Illumina MiSeq	Leader	FR4	None
SRR4297089	Male	Lung	Multiplex	Brain death	46	2×300	Illumina MiSeq	Leader	FR4	None
SRR4297090	Male	Lymph node	Multiplex	Brain death	46	2×300	Illumina MiSeq	Leader	FR4	None
SRR4297091	Male	PBMC	Multiplex	Brain death	46	2×300	Illumina MiSeq	Leader	FR4	None
SRR4297092	Male	Spleen	Multiplex	Brain death	46	2×300	Illumina MiSeq	Leader	FR4	None
SRR4297093	Male	Bone marrow	Multiplex	Brain death	46	2×300	Illumina MiSeq	Leader	FR4	None
SRR4297094	Male	Intestine	Multiplex	Brain death	46	2×300	Illumina MiSeq	Leader	FR4	None
SRR4297095	Male	Intestine	Multiplex	Brain death	46	2×300	Illumina MiSeq	Leader	FR4	None
SRR4297096	Male	Intestine	Multiplex	Brain death	46	2×300	Illumina MiSeq	Leader	FR4	None
SRR4297097	Male	Lung	Multiplex	Brain death	46	2×300	Illumina MiSeq	Leader	FR4	None
SRR4297098	Male	Lymph node	Multiplex	Brain death	46	2×300	Illumina MiSeq	Leader	FR4	None
SRR4297100	Male	Spleen	Multiplex	Brain death	46	2×300	Illumina MiSeq	Leader	FR4	None
SRR4297101	Female	Bone marrow	Multiplex	Brain death	56	2×300	Illumina MiSeq	Leader	FR4	None
SRR4297102	Female	Intestine	Multiplex	Brain death	56	2×300	Illumina MiSeq	Leader	FR4	None
SRR4297103	Female	Intestine	Multiplex	Brain death	56	2×300	Illumina MiSeq	Leader	FR4	None
SRR4297104	Female	Intestine	Multiplex	Brain death	56	2×300	Illumina MiSeq	Leader	FR4	None
SRR4297105	Female	Lung	Multiplex	Brain death	56	2×300	Illumina MiSeq	Leader	FR4	None
SRR4297107	Female	PBMC	Multiplex	Brain death	56	2×300	Illumina MiSeq	Leader	FR4	None
SRR4297108	Female	Spleen	Multiplex	Brain death	56	2×300	Illumina MiSeq	Leader	FR4	None
SRR4297109	Male	Bone marrow	Multiplex	Brain death	46	2×300	Illumina MiSeq	Leader	FR4	None
SRR4297110	Male	Intestine	Multiplex	Brain death	46	2×300	Illumina MiSeq	Leader	FR4	None
SRR4297111	Male	Intestine	Multiplex	Brain death	46	2×300	Illumina MiSeq	Leader	FR4	None
SRR4297112	Male	Intestine	Multiplex	Brain death	46	2×300	Illumina MiSeq	Leader	FR4	None
SRR4297113	Male	Lung	Multiplex	Brain death	46	2×300	Illumina MiSeq	Leader	FR4	None
SRR4297114	Male	Lymph node	Multiplex	Brain death	46	2×300	Illumina MiSeq	Leader	FR4	None
SRR4297115	Male	PBMC	Multiplex	Brain death	46	2×300	Illumina MiSeq	Leader	FR4	None
SRR4297116	Male	Spleen	Multiplex	Brain death	46	2×300	Illumina MiSeq	Leader	FR4	None
SRR4297117	Male	Bone marrow	Multiplex	Brain death	46	2×300	Illumina MiSeq	Leader	FR4	None
SRR4297118	Male	Intestine	Multiplex	Brain death	46	2×300	Illumina MiSeq	Leader	FR4	None
SRR4297119	Male	Intestine	Multiplex	Brain death	46	2×300	Illumina MiSeq	Leader	FR4	None
SRR4297120	Male	Intestine	Multiplex	Brain death	46	2×300	Illumina MiSeq	Leader	FR4	None
SRR4297121	Male	Lung	Multiplex	Brain death	46	2×300	Illumina MiSeq	Leader	FR4	None
SRR4297122	Male	Lymph node	Multiplex	Brain death	46	2×300	Illumina MiSeq	Leader	FR4	None
SRR4297124	Male	Spleen	Multiplex	Brain death	46	2×300	Illumina MiSeq	Leader	FR4	None
SRR4297125	Female	Bone marrow	Multiplex	Brain death	56	2×300	Illumina MiSeq	Leader	FR4	None
SRR4297126	Female	Intestine	Multiplex	Brain death	56	2×300	Illumina MiSeq	Leader	FR4	None
SRR4297127	Female	Intestine	Multiplex	Brain death	56	2×300	Illumina MiSeq	Leader	FR4	None
SRR4297128	Female	Intestine	Multiplex	Brain death	56	2×300	Illumina MiSeq	Leader	FR4	None
SRR4297129	Female	Lung	Multiplex	Brain death	56	2×300	Illumina MiSeq	Leader	FR4	None
SRR4297131	Female	PBMC	Multiplex	Brain death	56	2×300	Illumina MiSeq	Leader	FR4	None
SRR4297132	Female	Spleen	Multiplex	Brain death	56	2×300	Illumina MiSeq	Leader	FR4	None
SRR4297133	Male	Bone marrow	Multiplex	Brain death	46	2×300	Illumina MiSeq	Leader	FR4	None
SRR4297134	Male	Intestine	Multiplex	Brain death	46	2×300	Illumina MiSeq	Leader	FR4	None
SRR4297135	Male	Intestine	Multiplex	Brain death	46	2×300	Illumina MiSeq	Leader	FR4	None
SRR4297136	Male	Intestine	Multiplex	Brain death	46	2×300	Illumina MiSeq	Leader	FR4	None
SRR4297137	Male	Lung	Multiplex	Brain death	46	2×300	Illumina MiSeq	Leader	FR4	None
SRR4297138	Male	Lymph node	Multiplex	Brain death	46	2×300	Illumina MiSeq	Leader	FR4	None
SRR4297139	Male	PBMC	Multiplex	Brain death	46	2×300	Illumina MiSeq	Leader	FR4	None
SRR4297140	Male	Spleen	Multiplex	Brain death	46	2×300	Illumina MiSeq	Leader	FR4	None
SRR4297141	Male	Bone marrow	Multiplex	Brain death	46	2×300	Illumina MiSeq	Leader	FR4	None
SRR4297142	Male	Intestine	Multiplex	Brain death	46	2×300	Illumina MiSeq	Leader	FR4	None
SRR4297143	Male	Intestine	Multiplex	Brain death	46	2×300	Illumina MiSeq	Leader	FR4	None
SRR4297144	Male	Intestine	Multiplex	Brain death	46	2×300	Illumina MiSeq	Leader	FR4	None
SRR4297145	Male	Lung	Multiplex	Brain death	46	2×300	Illumina MiSeq	Leader	FR4	None
SRR4297146	Male	Lymph node	Multiplex	Brain death	46	2×300	Illumina MiSeq	Leader	FR4	None
SRR4297148	Male	Spleen	Multiplex	Brain death	46	2×300	Illumina MiSeq	Leader	FR4	None
SRR4297149	Male	PBMC	Multiplex	Brain death	46	2×300	Illumina MiSeq	Leader	FR4	None
SRR4297151	Male	PBMC	Multiplex	Brain death	46	2×300	Illumina MiSeq	Leader	FR4	None
SRR4297153	Male	PBMC	Multiplex	Brain death	46	2×300	Illumina MiSeq	Leader	FR4	None
SRR4297155	Male	Bone marrow	Multiplex	Brain death	58	2×300	Illumina MiSeq	Leader	FR4	None
SRR4297156	Male	Intestine	Multiplex	Brain death	58	2×300	Illumina MiSeq	Leader	FR4	None
SRR4297157	Male	Intestine	Multiplex	Brain death	58	2×300	Illumina MiSeq	Leader	FR4	None
SRR4297158	Male	Intestine	Multiplex	Brain death	58	2×300	Illumina MiSeq	Leader	FR4	None
SRR4297161	Male	Intestine	Multiplex	Brain death	58	2×300	Illumina MiSeq	Leader	FR4	None
SRR4297162	Male	Intestine	Multiplex	Brain death	58	2×300	Illumina MiSeq	Leader	FR4	None
SRR4297163	Male	Intestine	Multiplex	Brain death	58	2×300	Illumina MiSeq	Leader	FR4	None
SRR4297164	Male	Intestine	Multiplex	Brain death	58	2×300	Illumina MiSeq	Leader	FR4	None
SRR4297166	Male	Bone marrow	Multiplex	Brain death	58	2×300	Illumina MiSeq	Leader	FR4	None
SRR4297169	Male	Lung	Multiplex	Brain death	58	2×300	Illumina MiSeq	Leader	FR4	None
SRR4297170	Male	Lung	Multiplex	Brain death	58	2×300	Illumina MiSeq	Leader	FR4	None
SRR4297171	Male	Lung	Multiplex	Brain death	58	2×300	Illumina MiSeq	Leader	FR4	None
SRR4297172	Male	Bone marrow	Multiplex	Brain death	55	2×300	Illumina MiSeq	Leader	FR4	None
SRR4297177	Male	Bone marrow	Multiplex	Brain death	58	2×300	Illumina MiSeq	Leader	FR4	None
SRR4297200	Male	Spleen	Multiplex	Brain death	58	2×300	Illumina MiSeq	Leader	FR4	None
SRR4297203	Male	Bone marrow	Multiplex	Brain death	23	2×300	Illumina MiSeq	Leader	FR4	None
SRR4297204	Male	Lung	Multiplex	Brain death	23	2×300	Illumina MiSeq	FR1	FR4	None
SRR4297205	Male	Intestine	Multiplex	Brain death	23	2×300	Illumina MiSeq	Leader	FR4	None
SRR4297206	Male	Lung	Multiplex	Brain death	23	2×300	Illumina MiSeq	FR1	FR4	None
SRR4297207	Male	Intestine	Multiplex	Brain death	23	2×300	Illumina MiSeq	Leader	FR4	None
SRR4297208	Male	Lung	Multiplex	Brain death	23	2×300	Illumina MiSeq	FR1	FR4	None
SRR4297209	Male	Intestine	Multiplex	Brain death	23	2×300	Illumina MiSeq	Leader	FR4	None
SRR4297210	Male	Lung	Multiplex	Brain death	23	2×300	Illumina MiSeq	FR1	FR4	None
SRR4297211	Male	Intestine	Multiplex	Brain death	23	2×300	Illumina MiSeq	Leader	FR4	None
SRR4297212	Male	Lung	Multiplex	Brain death	23	2×300	Illumina MiSeq	FR1	FR4	None
SRR4297213	Male	Intestine	Multiplex	Brain death	23	2×300	Illumina MiSeq	Leader	FR4	None
SRR4297214	Male	Lung	Multiplex	Brain death	23	2×300	Illumina MiSeq	FR1	FR4	None
SRR4297215	Male	Intestine	Multiplex	Brain death	23	2×300	Illumina MiSeq	Leader	FR4	None
SRR4297216	Male	Lung	Multiplex	Brain death	23	2×300	Illumina MiSeq	FR1	FR4	None
SRR4297217	Male	Intestine	Multiplex	Brain death	23	2×300	Illumina MiSeq	Leader	FR4	None
SRR4297218	Male	Lung	Multiplex	Brain death	23	2×300	Illumina MiSeq	FR1	FR4	None
SRR4297219	Male	Intestine	Multiplex	Brain death	23	2×300	Illumina MiSeq	Leader	FR4	None
SRR4297220	Male	Lung	Multiplex	Brain death	23	2×300	Illumina MiSeq	FR1	FR4	None
SRR4297221	Male	Intestine	Multiplex	Brain death	23	2×300	Illumina MiSeq	Leader	FR4	None
SRR4297222	Male	Lung	Multiplex	Brain death	23	2×300	Illumina MiSeq	FR1	FR4	None
SRR4297223	Male	Lung	Multiplex	Brain death	23	2×300	Illumina MiSeq	FR1	FR4	None
SRR4297224	Male	Lymph node	Multiplex	Brain death	23	2×300	Illumina MiSeq	Leader	FR4	None
SRR4297225	Male	Bone marrow	Multiplex	Brain death	23	2×300	Illumina MiSeq	Leader	FR4	None
SRR4297226	Male	Lung	Multiplex	Brain death	23	2×300	Illumina MiSeq	FR1	FR4	None
SRR4297227	Male	Lung	Multiplex	Brain death	23	2×300	Illumina MiSeq	FR1	FR4	None
SRR4297228	Male	Lymph node	Multiplex	Brain death	23	2×300	Illumina MiSeq	Leader	FR4	None
SRR4297229	Male	Lymph node	Multiplex	Brain death	23	2×300	Illumina MiSeq	Leader	FR4	None
SRR4297230	Male	Lung	Multiplex	Brain death	23	2×300	Illumina MiSeq	Leader	FR4	None
SRR4297231	Male	Lung	Multiplex	Brain death	23	2×300	Illumina MiSeq	Leader	FR4	None
SRR4297232	Male	Lung	Multiplex	Brain death	23	2×300	Illumina MiSeq	Leader	FR4	None
SRR4297233	Male	Bone marrow	Multiplex	Brain death	46	2×300	Illumina MiSeq	Leader	FR4	None
SRR4297234	Male	Bone marrow	Multiplex	Brain death	46	2×300	Illumina MiSeq	Leader	FR4	None
SRR4297235	Male	Bone marrow	Multiplex	Brain death	46	2×300	Illumina MiSeq	Leader	FR4	None
SRR4297236	Male	PBMC	Multiplex	Brain death	46	2×300	Illumina MiSeq	Leader	FR4	None
SRR4297237	Male	PBMC	Multiplex	Brain death	46	2×300	Illumina MiSeq	Leader	FR4	None
SRR4297238	Male	Bone marrow	Multiplex	Brain death	23	2×300	Illumina MiSeq	Leader	FR4	None
SRR4297239	Male	Lung	Multiplex	Brain death	23	2×300	Illumina MiSeq	FR1	FR4	None
SRR4297240	Male	PBMC	Multiplex	Brain death	46	2×300	Illumina MiSeq	Leader	FR4	None
SRR4297241	Male	Spleen	Multiplex	Brain death	46	2×300	Illumina MiSeq	Leader	FR4	None
SRR4297242	Male	Spleen	Multiplex	Brain death	46	2×300	Illumina MiSeq	Leader	FR4	None
SRR4297243	Male	Spleen	Multiplex	Brain death	46	2×300	Illumina MiSeq	Leader	FR4	None
SRR4297244	Male	Intestine	Multiplex	Brain death	46	2×300	Illumina MiSeq	Leader	FR4	None
SRR4297245	Male	Intestine	Multiplex	Brain death	46	2×300	Illumina MiSeq	Leader	FR4	None
SRR4297246	Male	Intestine	Multiplex	Brain death	46	2×300	Illumina MiSeq	Leader	FR4	None
SRR4297247	Male	Intestine	Multiplex	Brain death	46	2×300	Illumina MiSeq	Leader	FR4	None
SRR4297248	Male	Intestine	Multiplex	Brain death	46	2×300	Illumina MiSeq	Leader	FR4	None
SRR4297249	Male	Intestine	Multiplex	Brain death	46	2×300	Illumina MiSeq	Leader	FR4	None
SRR4297250	Male	Lung	Multiplex	Brain death	23	2×300	Illumina MiSeq	FR1	FR4	None
SRR4297251	Male	PBMC	Multiplex	Brain death	23	2×300	Illumina MiSeq	Leader	FR4	None
SRR4297252	Male	Intestine	Multiplex	Brain death	46	2×300	Illumina MiSeq	Leader	FR4	None
SRR4297253	Male	Intestine	Multiplex	Brain death	46	2×300	Illumina MiSeq	Leader	FR4	None
SRR4297254	Male	Intestine	Multiplex	Brain death	46	2×300	Illumina MiSeq	Leader	FR4	None
SRR4297255	Male	Lymph node	Multiplex	Brain death	46	2×300	Illumina MiSeq	Leader	FR4	None
SRR4297256	Male	Lymph node	Multiplex	Brain death	46	2×300	Illumina MiSeq	Leader	FR4	None
SRR4297257	Male	Lymph node	Multiplex	Brain death	46	2×300	Illumina MiSeq	Leader	FR4	None
SRR4297258	Male	Lung	Multiplex	Brain death	46	2×300	Illumina MiSeq	Leader	FR4	None
SRR4297259	Male	Lung	Multiplex	Brain death	46	2×300	Illumina MiSeq	Leader	FR4	None
SRR4297260	Male	Lung	Multiplex	Brain death	46	2×300	Illumina MiSeq	Leader	FR4	None
SRR4297261	Male	Lung	Multiplex	Brain death	23	2×300	Illumina MiSeq	FR1	FR4	None
SRR4297262	Male	PBMC	Multiplex	Brain death	23	2×300	Illumina MiSeq	Leader	FR4	None
SRR4297263	Male	Lung	Multiplex	Brain death	23	2×300	Illumina MiSeq	FR1	FR4	None
SRR4297264	Male	PBMC	Multiplex	Brain death	23	2×300	Illumina MiSeq	Leader	FR4	None
SRR4297265	Male	Lung	Multiplex	Brain death	23	2×300	Illumina MiSeq	FR1	FR4	None
SRR4297266	Male	Spleen	Multiplex	Brain death	23	2×300	Illumina MiSeq	Leader	FR4	None
SRR4297267	Male	Lung	Multiplex	Brain death	23	2×300	Illumina MiSeq	FR1	FR4	None
SRR4297268	Male	Spleen	Multiplex	Brain death	23	2×300	Illumina MiSeq	Leader	FR4	None
SRR4297269	Male	Lung	Multiplex	Brain death	23	2×300	Illumina MiSeq	FR1	FR4	None
SRR4297270	Male	Spleen	Multiplex	Brain death	23	2×300	Illumina MiSeq	Leader	FR4	None
SRR4297273	Female	Intestine	Multiplex	Brain death	56	2×300	Illumina MiSeq	Leader	FR4	None
SRR4297274	Female	Intestine	Multiplex	Brain death	56	2×300	Illumina MiSeq	Leader	FR4	None
SRR4297275	Female	Intestine	Multiplex	Brain death	56	2×300	Illumina MiSeq	Leader	FR4	None
SRR4297276	Female	Intestine	Multiplex	Brain death	56	2×300	Illumina MiSeq	Leader	FR4	None
SRR4297281	Female	Bone marrow	Multiplex	Brain death	56	2×300	Illumina MiSeq	Leader	FR4	None
SRR4297296	Male	Spleen	Multiplex	Brain death	46	2×300	Illumina MiSeq	Leader	FR4	None
SRR4297300	Male	Intestine	Multiplex	Brain death	46	2×300	Illumina MiSeq	Leader	FR4	None
SRR4297301	Male	Intestine	Multiplex	Brain death	46	2×300	Illumina MiSeq	Leader	FR4	None
SRR4297302	Male	Intestine	Multiplex	Brain death	46	2×300	Illumina MiSeq	Leader	FR4	None
SRR4297309	Male	Lymph node	Multiplex	Brain death	46	2×300	Illumina MiSeq	Leader	FR4	None
SRR4297310	Male	Lung	Multiplex	Brain death	46	2×300	Illumina MiSeq	Leader	FR4	None
SRR4297311	Male	Lung	Multiplex	Brain death	46	2×300	Illumina MiSeq	Leader	FR4	None
SRR4297312	Male	Lung	Multiplex	Brain death	46	2×300	Illumina MiSeq	Leader	FR4	None
SRR4297315	Male	Bone marrow	Multiplex	Brain death	23	2×300	Illumina MiSeq	FR1	FR4	None
SRR4297316	Male	Bone marrow	Multiplex	Brain death	23	2×300	Illumina MiSeq	FR1	FR4	None
SRR4297317	Male	Bone marrow	Multiplex	Brain death	23	2×300	Illumina MiSeq	FR1	FR4	None
SRR4297318	Male	Bone marrow	Multiplex	Brain death	23	2×300	Illumina MiSeq	FR1	FR4	None
SRR4297319	Male	Bone marrow	Multiplex	Brain death	23	2×300	Illumina MiSeq	FR1	FR4	None
SRR4297320	Male	Bone marrow	Multiplex	Brain death	23	2×300	Illumina MiSeq	FR1	FR4	None
SRR4297321	Male	Bone marrow	Multiplex	Brain death	23	2×300	Illumina MiSeq	FR1	FR4	None
SRR4297323	Male	Bone marrow	Multiplex	Brain death	23	2×300	Illumina MiSeq	FR1	FR4	None
SRR4297324	Male	Bone marrow	Multiplex	Brain death	23	2×300	Illumina MiSeq	FR1	FR4	None
SRR4297326	Male	Bone marrow	Multiplex	Brain death	23	2×300	Illumina MiSeq	FR1	FR4	None
SRR4297327	Male	Bone marrow	Multiplex	Brain death	23	2×300	Illumina MiSeq	FR1	FR4	None
SRR4297328	Male	Bone marrow	Multiplex	Brain death	23	2×300	Illumina MiSeq	FR1	FR4	None
SRR4297329	Male	Bone marrow	Multiplex	Brain death	23	2×300	Illumina MiSeq	FR1	FR4	None
SRR4297330	Male	Bone marrow	Multiplex	Brain death	23	2×300	Illumina MiSeq	FR1	FR4	None
SRR4297331	Male	Bone marrow	Multiplex	Brain death	23	2×300	Illumina MiSeq	FR1	FR4	None
SRR4297332	Male	Bone marrow	Multiplex	Brain death	23	2×300	Illumina MiSeq	FR1	FR4	None
SRR4297333	Male	Bone marrow	Multiplex	Brain death	23	2×300	Illumina MiSeq	FR1	FR4	None
SRR4297335	Male	Bone marrow	Multiplex	Brain death	23	2×300	Illumina MiSeq	FR1	FR4	None
SRR4297336	Female	Spleen	Multiplex	Brain death	56	2×300	Illumina MiSeq	Leader	FR4	None
SRR4297337	Male	Bone marrow	Multiplex	Brain death	23	2×300	Illumina MiSeq	FR1	FR4	None
SRR4297338	Male	Bone marrow	Multiplex	Brain death	23	2×300	Illumina MiSeq	FR1	FR4	None
SRR4297339	Male	Bone marrow	Multiplex	Brain death	23	2×300	Illumina MiSeq	FR1	FR4	None
SRR4297340	Male	Bone marrow	Multiplex	Brain death	23	2×300	Illumina MiSeq	FR1	FR4	None
SRR4297341	Male	Bone marrow	Multiplex	Brain death	23	2×300	Illumina MiSeq	FR1	FR4	None
SRR4297342	Male	Bone marrow	Multiplex	Brain death	23	2×300	Illumina MiSeq	FR1	FR4	None
SRR4297343	Male	Bone marrow	Multiplex	Brain death	23	2×300	Illumina MiSeq	FR1	FR4	None
SRR4297344	Male	Bone marrow	Multiplex	Brain death	23	2×300	Illumina MiSeq	FR1	FR4	None
SRR4297346	Female	Spleen	Multiplex	Brain death	56	2×300	Illumina MiSeq	Leader	FR4	None
SRR4297347	Male	Intestine	Multiplex	Brain death	23	2×300	Illumina MiSeq	FR1	FR4	None
SRR4297348	Male	Intestine	Multiplex	Brain death	23	2×300	Illumina MiSeq	FR1	FR4	None
SRR4297349	Male	Intestine	Multiplex	Brain death	23	2×300	Illumina MiSeq	FR1	FR4	None
SRR4297350	Male	Intestine	Multiplex	Brain death	23	2×300	Illumina MiSeq	FR1	FR4	None
SRR4297351	Male	Intestine	Multiplex	Brain death	23	2×300	Illumina MiSeq	FR1	FR4	None
SRR4297352	Male	Intestine	Multiplex	Brain death	23	2×300	Illumina MiSeq	FR1	FR4	None
SRR4297353	Male	Intestine	Multiplex	Brain death	23	2×300	Illumina MiSeq	FR1	FR4	None
SRR4297354	Male	Intestine	Multiplex	Brain death	23	2×300	Illumina MiSeq	FR1	FR4	None
SRR4297355	Male	Intestine	Multiplex	Brain death	23	2×300	Illumina MiSeq	FR1	FR4	None
SRR4297356	Male	Intestine	Multiplex	Brain death	23	2×300	Illumina MiSeq	FR1	FR4	None
SRR4297357	Male	Intestine	Multiplex	Brain death	23	2×300	Illumina MiSeq	FR1	FR4	None
SRR4297358	Male	Intestine	Multiplex	Brain death	23	2×300	Illumina MiSeq	FR1	FR4	None
SRR4297359	Male	Intestine	Multiplex	Brain death	23	2×300	Illumina MiSeq	FR1	FR4	None
SRR4297360	Male	Intestine	Multiplex	Brain death	23	2×300	Illumina MiSeq	FR1	FR4	None
SRR4297361	Male	Intestine	Multiplex	Brain death	23	2×300	Illumina MiSeq	FR1	FR4	None
SRR4297362	Male	Intestine	Multiplex	Brain death	23	2×300	Illumina MiSeq	FR1	FR4	None
SRR4297363	Male	Intestine	Multiplex	Brain death	23	2×300	Illumina MiSeq	FR1	FR4	None
SRR4297364	Male	Intestine	Multiplex	Brain death	23	2×300	Illumina MiSeq	FR1	FR4	None
SRR4297365	Male	Intestine	Multiplex	Brain death	23	2×300	Illumina MiSeq	FR1	FR4	None
SRR4297366	Male	Bone marrow	Multiplex	Brain death	55	2×300	Illumina MiSeq	Leader	FR4	None
SRR4297367	Male	Bone marrow	Multiplex	Brain death	55	2×300	Illumina MiSeq	Leader	FR4	None
SRR4297368	Male	Bone marrow	Multiplex	Brain death	55	2×300	Illumina MiSeq	Leader	FR4	None
SRR4297369	Male	Spleen	Multiplex	Brain death	55	2×300	Illumina MiSeq	Leader	FR4	None
SRR4297371	Male	Spleen	Multiplex	Brain death	55	2×300	Illumina MiSeq	Leader	FR4	None
SRR4297372	Male	Intestine	Multiplex	Brain death	55	2×300	Illumina MiSeq	Leader	FR4	None
SRR4297374	Male	Intestine	Multiplex	Brain death	55	2×300	Illumina MiSeq	Leader	FR4	None
SRR4297375	Male	Intestine	Multiplex	Brain death	55	2×300	Illumina MiSeq	Leader	FR4	None
SRR4297387	Male	Intestine	Multiplex	Brain death	23	2×300	Illumina MiSeq	FR1	FR4	None
SRR4297388	Male	Intestine	Multiplex	Brain death	23	2×300	Illumina MiSeq	FR1	FR4	None
SRR4297389	Male	Intestine	Multiplex	Brain death	23	2×300	Illumina MiSeq	FR1	FR4	None
SRR4297390	Male	Intestine	Multiplex	Brain death	23	2×300	Illumina MiSeq	FR1	FR4	None
SRR4297391	Male	Intestine	Multiplex	Brain death	23	2×300	Illumina MiSeq	FR1	FR4	None
SRR4297392	Male	Intestine	Multiplex	Brain death	23	2×300	Illumina MiSeq	FR1	FR4	None
SRR4297393	Male	Intestine	Multiplex	Brain death	23	2×300	Illumina MiSeq	FR1	FR4	None
SRR4297394	Male	Intestine	Multiplex	Brain death	23	2×300	Illumina MiSeq	FR1	FR4	None
SRR4297395	Male	Intestine	Multiplex	Brain death	23	2×300	Illumina MiSeq	FR1	FR4	None
SRR4297396	Male	Intestine	Multiplex	Brain death	23	2×300	Illumina MiSeq	FR1	FR4	None
SRR4297397	Male	Intestine	Multiplex	Brain death	23	2×300	Illumina MiSeq	FR1	FR4	None
SRR4297398	Male	Intestine	Multiplex	Brain death	23	2×300	Illumina MiSeq	FR1	FR4	None
SRR4297399	Male	Intestine	Multiplex	Brain death	46	2×300	Illumina MiSeq	FR1	FR4	None
SRR4297400	Male	Intestine	Multiplex	Brain death	46	2×300	Illumina MiSeq	FR1	FR4	None
SRR4297401	Male	Intestine	Multiplex	Brain death	46	2×300	Illumina MiSeq	FR1	FR4	None
SRR4297402	Male	Intestine	Multiplex	Brain death	46	2×300	Illumina MiSeq	FR1	FR4	None
SRR4297403	Male	Intestine	Multiplex	Brain death	46	2×300	Illumina MiSeq	FR1	FR4	None
SRR4297404	Male	Intestine	Multiplex	Brain death	46	2×300	Illumina MiSeq	FR1	FR4	None
SRR4297405	Male	Intestine	Multiplex	Brain death	46	2×300	Illumina MiSeq	FR1	FR4	None
SRR4297406	Male	Intestine	Multiplex	Brain death	46	2×300	Illumina MiSeq	FR1	FR4	None
SRR4297407	Male	Intestine	Multiplex	Brain death	46	2×300	Illumina MiSeq	FR1	FR4	None
SRR4297408	Male	Intestine	Multiplex	Brain death	46	2×300	Illumina MiSeq	FR1	FR4	None
SRR4297409	Male	Intestine	Multiplex	Brain death	23	2×300	Illumina MiSeq	FR1	FR4	None
SRR4297410	Male	Intestine	Multiplex	Brain death	46	2×300	Illumina MiSeq	FR1	FR4	None
SRR4297411	Male	Intestine	Multiplex	Brain death	46	2×300	Illumina MiSeq	FR1	FR4	None
SRR4297412	Male	Intestine	Multiplex	Brain death	46	2×300	Illumina MiSeq	FR1	FR4	None
SRR4297413	Male	Intestine	Multiplex	Brain death	46	2×300	Illumina MiSeq	FR1	FR4	None
SRR4297414	Male	Intestine	Multiplex	Brain death	46	2×300	Illumina MiSeq	FR1	FR4	None
SRR4297415	Male	Intestine	Multiplex	Brain death	46	2×300	Illumina MiSeq	FR1	FR4	None
SRR4297416	Male	Intestine	Multiplex	Brain death	46	2×300	Illumina MiSeq	FR1	FR4	None
SRR4297417	Male	Intestine	Multiplex	Brain death	46	2×300	Illumina MiSeq	FR1	FR4	None
SRR4297418	Male	Intestine	Multiplex	Brain death	46	2×300	Illumina MiSeq	FR1	FR4	None
SRR4297419	Male	Intestine	Multiplex	Brain death	46	2×300	Illumina MiSeq	FR1	FR4	None
SRR4297420	Male	Intestine	Multiplex	Brain death	23	2×300	Illumina MiSeq	FR1	FR4	None
SRR4297421	Male	Intestine	Multiplex	Brain death	46	2×300	Illumina MiSeq	FR1	FR4	None
SRR4297422	Male	Intestine	Multiplex	Brain death	46	2×300	Illumina MiSeq	FR1	FR4	None
SRR4297423	Male	Intestine	Multiplex	Brain death	46	2×300	Illumina MiSeq	FR1	FR4	None
SRR4297424	Male	Intestine	Multiplex	Brain death	46	2×300	Illumina MiSeq	FR1	FR4	None
SRR4297425	Male	Lung	Multiplex	Brain death	46	2×300	Illumina MiSeq	FR1	FR4	None
SRR4297426	Male	Lung	Multiplex	Brain death	46	2×300	Illumina MiSeq	FR1	FR4	None
SRR4297427	Male	Lung	Multiplex	Brain death	46	2×300	Illumina MiSeq	FR1	FR4	None
SRR4297429	Male	Lung	Multiplex	Brain death	46	2×300	Illumina MiSeq	FR1	FR4	None
SRR4297430	Male	Spleen	Multiplex	Brain death	46	2×300	Illumina MiSeq	FR1	FR4	None
SRR4297431	Male	Intestine	Multiplex	Brain death	23	2×300	Illumina MiSeq	FR1	FR4	None
SRR4297432	Male	Spleen	Multiplex	Brain death	46	2×300	Illumina MiSeq	FR1	FR4	None
SRR4297433	Male	Spleen	Multiplex	Brain death	46	2×300	Illumina MiSeq	FR1	FR4	None
SRR4297434	Male	Spleen	Multiplex	Brain death	46	2×300	Illumina MiSeq	FR1	FR4	None
SRR4297435	Male	Spleen	Multiplex	Brain death	46	2×300	Illumina MiSeq	FR1	FR4	None
SRR4297436	Male	Spleen	Multiplex	Brain death	46	2×300	Illumina MiSeq	FR1	FR4	None
SRR4297437	Male	Spleen	Multiplex	Brain death	46	2×300	Illumina MiSeq	FR1	FR4	None
SRR4297438	Male	Spleen	Multiplex	Brain death	46	2×300	Illumina MiSeq	FR1	FR4	None
SRR4297439	Male	Lymph node	Multiplex	Brain death	46	2×300	Illumina MiSeq	FR1	FR4	None
SRR4297440	Male	Lymph node	Multiplex	Brain death	46	2×300	Illumina MiSeq	FR1	FR4	None
SRR4297441	Male	Lymph node	Multiplex	Brain death	46	2×300	Illumina MiSeq	FR1	FR4	None
SRR4297442	Male	Intestine	Multiplex	Brain death	23	2×300	Illumina MiSeq	FR1	FR4	None
SRR4297443	Male	Lymph node	Multiplex	Brain death	46	2×300	Illumina MiSeq	FR1	FR4	None
SRR4297444	Male	PBMC	Multiplex	Brain death	46	2×300	Illumina MiSeq	FR1	FR4	None
SRR4297445	Male	PBMC	Multiplex	Brain death	46	2×300	Illumina MiSeq	FR1	FR4	None
SRR4297446	Male	PBMC	Multiplex	Brain death	46	2×300	Illumina MiSeq	FR1	FR4	None
SRR4297447	Male	PBMC	Multiplex	Brain death	46	2×300	Illumina MiSeq	FR1	FR4	None
SRR4297448	Male	PBMC	Multiplex	Brain death	46	2×300	Illumina MiSeq	FR1	FR4	None
SRR4297449	Male	PBMC	Multiplex	Brain death	46	2×300	Illumina MiSeq	FR1	FR4	None
SRR4297450	Male	PBMC	Multiplex	Brain death	46	2×300	Illumina MiSeq	FR1	FR4	None
SRR4297451	Male	PBMC	Multiplex	Brain death	46	2×300	Illumina MiSeq	FR1	FR4	None
SRR4297452	Male	Bone marrow	Multiplex	Brain death	46	2×300	Illumina MiSeq	FR1	FR4	None
SRR4297453	Male	Intestine	Multiplex	Brain death	23	2×300	Illumina MiSeq	FR1	FR4	None
SRR4297454	Male	Bone marrow	Multiplex	Brain death	46	2×300	Illumina MiSeq	FR1	FR4	None
SRR4297455	Male	Bone marrow	Multiplex	Brain death	46	2×300	Illumina MiSeq	FR1	FR4	None
SRR4297456	Male	Bone marrow	Multiplex	Brain death	46	2×300	Illumina MiSeq	FR1	FR4	None
SRR4297457	Male	Bone marrow	Multiplex	Brain death	46	2×300	Illumina MiSeq	FR1	FR4	None
SRR4297458	Male	Bone marrow	Multiplex	Brain death	46	2×300	Illumina MiSeq	FR1	FR4	None
SRR4297459	Male	Bone marrow	Multiplex	Brain death	46	2×300	Illumina MiSeq	FR1	FR4	None
SRR4297460	Male	Lymph node	Multiplex	Brain death	46	2×300	Illumina MiSeq	FR1	FR4	None
SRR4297461	Male	Lymph node	Multiplex	Brain death	46	2×300	Illumina MiSeq	FR1	FR4	None
SRR4297462	Male	Lymph node	Multiplex	Brain death	46	2×300	Illumina MiSeq	FR1	FR4	None
SRR4297463	Male	Lymph node	Multiplex	Brain death	46	2×300	Illumina MiSeq	FR1	FR4	None
SRR4297464	Male	Intestine	Multiplex	Brain death	23	2×300	Illumina MiSeq	FR1	FR4	None
SRR4297465	Male	Intestine	Multiplex	Brain death	23	2×300	Illumina MiSeq	FR1	FR4	None
SRR4297466	Male	PBMC	Multiplex	Brain death	23	2×300	Illumina MiSeq	FR1	FR4	None
SRR4297467	Male	PBMC	Multiplex	Brain death	23	2×300	Illumina MiSeq	FR1	FR4	None
SRR4297468	Male	PBMC	Multiplex	Brain death	23	2×300	Illumina MiSeq	FR1	FR4	None
SRR4297469	Male	PBMC	Multiplex	Brain death	23	2×300	Illumina MiSeq	FR1	FR4	None
SRR4297470	Male	PBMC	Multiplex	Brain death	23	2×300	Illumina MiSeq	FR1	FR4	None
SRR4297471	Male	PBMC	Multiplex	Brain death	23	2×300	Illumina MiSeq	FR1	FR4	None
SRR4297472	Male	PBMC	Multiplex	Brain death	23	2×300	Illumina MiSeq	FR1	FR4	None
SRR4297473	Male	PBMC	Multiplex	Brain death	23	2×300	Illumina MiSeq	FR1	FR4	None
SRR4297475	Male	PBMC	Multiplex	Brain death	23	2×300	Illumina MiSeq	FR1	FR4	None
SRR4297476	Male	PBMC	Multiplex	Brain death	23	2×300	Illumina MiSeq	FR1	FR4	None
SRR4297477	Male	PBMC	Multiplex	Brain death	23	2×300	Illumina MiSeq	FR1	FR4	None
SRR4297478	Male	PBMC	Multiplex	Brain death	23	2×300	Illumina MiSeq	FR1	FR4	None
SRR4297479	Male	PBMC	Multiplex	Brain death	23	2×300	Illumina MiSeq	FR1	FR4	None
SRR4297480	Male	PBMC	Multiplex	Brain death	23	2×300	Illumina MiSeq	FR1	FR4	None
SRR4297481	Male	PBMC	Multiplex	Brain death	23	2×300	Illumina MiSeq	FR1	FR4	None
SRR4297482	Male	PBMC	Multiplex	Brain death	23	2×300	Illumina MiSeq	FR1	FR4	None
SRR4297483	Male	PBMC	Multiplex	Brain death	23	2×300	Illumina MiSeq	FR1	FR4	None
SRR4297484	Male	PBMC	Multiplex	Brain death	23	2×300	Illumina MiSeq	FR1	FR4	None
SRR4297485	Male	PBMC	Multiplex	Brain death	23	2×300	Illumina MiSeq	FR1	FR4	None
SRR4297486	Male	PBMC	Multiplex	Brain death	23	2×300	Illumina MiSeq	FR1	FR4	None
SRR4297487	Male	PBMC	Multiplex	Brain death	23	2×300	Illumina MiSeq	FR1	FR4	None
SRR4297488	Male	PBMC	Multiplex	Brain death	23	2×300	Illumina MiSeq	FR1	FR4	None
SRR4297489	Male	PBMC	Multiplex	Brain death	23	2×300	Illumina MiSeq	FR1	FR4	None
SRR4297490	Male	PBMC	Multiplex	Brain death	23	2×300	Illumina MiSeq	FR1	FR4	None
SRR4297491	Male	PBMC	Multiplex	Brain death	23	2×300	Illumina MiSeq	FR1	FR4	None
SRR4297492	Male	PBMC	Multiplex	Brain death	23	2×300	Illumina MiSeq	FR1	FR4	None
SRR4297493	Male	PBMC	Multiplex	Brain death	23	2×300	Illumina MiSeq	FR1	FR4	None
SRR4297494	Male	PBMC	Multiplex	Brain death	23	2×300	Illumina MiSeq	FR1	FR4	None
SRR4297495	Male	PBMC	Multiplex	Brain death	23	2×300	Illumina MiSeq	FR1	FR4	None
SRR4297496	Male	PBMC	Multiplex	Brain death	23	2×300	Illumina MiSeq	FR1	FR4	None
SRR4297497	Male	Lymph node	Multiplex	Brain death	23	2×300	Illumina MiSeq	FR1	FR4	None
SRR4297498	Male	Lymph node	Multiplex	Brain death	23	2×300	Illumina MiSeq	FR1	FR4	None
SRR4297499	Male	PBMC	Multiplex	Brain death	23	2×300	Illumina MiSeq	FR1	FR4	None
SRR4297500	Male	Lymph node	Multiplex	Brain death	23	2×300	Illumina MiSeq	FR1	FR4	None
SRR4297501	Male	Lymph node	Multiplex	Brain death	23	2×300	Illumina MiSeq	FR1	FR4	None
SRR4297502	Male	Lymph node	Multiplex	Brain death	23	2×300	Illumina MiSeq	FR1	FR4	None
SRR4297503	Male	Lymph node	Multiplex	Brain death	23	2×300	Illumina MiSeq	FR1	FR4	None
SRR4297504	Male	Lymph node	Multiplex	Brain death	23	2×300	Illumina MiSeq	FR1	FR4	None
SRR4297505	Male	Lymph node	Multiplex	Brain death	23	2×300	Illumina MiSeq	FR1	FR4	None
SRR4297506	Male	Lymph node	Multiplex	Brain death	23	2×300	Illumina MiSeq	FR1	FR4	None
SRR4297507	Male	Lymph node	Multiplex	Brain death	23	2×300	Illumina MiSeq	FR1	FR4	None
SRR4297508	Male	Lymph node	Multiplex	Brain death	23	2×300	Illumina MiSeq	FR1	FR4	None
SRR4297509	Male	Lymph node	Multiplex	Brain death	23	2×300	Illumina MiSeq	FR1	FR4	None
SRR4297510	Male	PBMC	Multiplex	Brain death	23	2×300	Illumina MiSeq	FR1	FR4	None
SRR4297511	Male	Lymph node	Multiplex	Brain death	23	2×300	Illumina MiSeq	FR1	FR4	None
SRR4297512	Male	Lymph node	Multiplex	Brain death	23	2×300	Illumina MiSeq	FR1	FR4	None
SRR4297513	Male	Lymph node	Multiplex	Brain death	23	2×300	Illumina MiSeq	FR1	FR4	None
SRR4297514	Male	Lymph node	Multiplex	Brain death	23	2×300	Illumina MiSeq	FR1	FR4	None
SRR4297515	Male	Lymph node	Multiplex	Brain death	23	2×300	Illumina MiSeq	FR1	FR4	None
SRR4297516	Male	Lymph node	Multiplex	Brain death	23	2×300	Illumina MiSeq	FR1	FR4	None
SRR4297517	Male	Lymph node	Multiplex	Brain death	23	2×300	Illumina MiSeq	FR1	FR4	None
SRR4297518	Male	Lymph node	Multiplex	Brain death	23	2×300	Illumina MiSeq	FR1	FR4	None
SRR4297519	Male	Lymph node	Multiplex	Brain death	23	2×300	Illumina MiSeq	FR1	FR4	None
SRR4297520	Male	Lymph node	Multiplex	Brain death	23	2×300	Illumina MiSeq	FR1	FR4	None
SRR4297521	Male	PBMC	Multiplex	Brain death	23	2×300	Illumina MiSeq	FR1	FR4	None
SRR4297522	Male	Lymph node	Multiplex	Brain death	23	2×300	Illumina MiSeq	FR1	FR4	None
SRR4297523	Male	Lymph node	Multiplex	Brain death	23	2×300	Illumina MiSeq	FR1	FR4	None
SRR4297524	Male	Lymph node	Multiplex	Brain death	23	2×300	Illumina MiSeq	FR1	FR4	None
SRR4297525	Male	Lymph node	Multiplex	Brain death	23	2×300	Illumina MiSeq	FR1	FR4	None
SRR4297526	Male	Lymph node	Multiplex	Brain death	23	2×300	Illumina MiSeq	FR1	FR4	None
SRR4297527	Male	Lymph node	Multiplex	Brain death	23	2×300	Illumina MiSeq	FR1	FR4	None
SRR4297528	Male	Lymph node	Multiplex	Brain death	23	2×300	Illumina MiSeq	FR1	FR4	None
SRR4297529	Male	Lymph node	Multiplex	Brain death	23	2×300	Illumina MiSeq	FR1	FR4	None
SRR4297530	Male	PBMC	Multiplex	Brain death	23	2×300	Illumina MiSeq	FR1	FR4	None
SRR4297531	Male	PBMC	Multiplex	Brain death	23	2×300	Illumina MiSeq	FR1	FR4	None
SRR4297532	Male	PBMC	Multiplex	Brain death	23	2×300	Illumina MiSeq	FR1	FR4	None
SRR4297533	Male	Intestine	Multiplex	Brain death	23	2×300	Illumina MiSeq	FR1	FR4	None
SRR4297534	Male	Intestine	Multiplex	Brain death	23	2×300	Illumina MiSeq	FR1	FR4	None
SRR4297536	Male	Intestine	Multiplex	Brain death	23	2×300	Illumina MiSeq	FR1	FR4	None
SRR4297537	Male	Intestine	Multiplex	Brain death	23	2×300	Illumina MiSeq	FR1	FR4	None
SRR4297538	Male	Intestine	Multiplex	Brain death	23	2×300	Illumina MiSeq	FR1	FR4	None
SRR4297539	Male	Bone marrow	Multiplex	Brain death	58	2×300	Illumina MiSeq	Leader	FR4	None
SRR4297540	Male	PBMC	Multiplex	Brain death	58	2×300	Illumina MiSeq	Leader	FR4	None
SRR4297541	Male	Spleen	Multiplex	Brain death	58	2×300	Illumina MiSeq	Leader	FR4	None
SRR4297542	Male	Lymph node	Multiplex	Brain death	58	2×300	Illumina MiSeq	Leader	FR4	None
SRR4297543	Male	Intestine	Multiplex	Brain death	58	2×300	Illumina MiSeq	Leader	FR4	None
SRR4297544	Male	Intestine	Multiplex	Brain death	23	2×300	Illumina MiSeq	FR1	FR4	None
SRR4297545	Male	Intestine	Multiplex	Brain death	58	2×300	Illumina MiSeq	Leader	FR4	None
SRR4297546	Male	Intestine	Multiplex	Brain death	58	2×300	Illumina MiSeq	Leader	FR4	None
SRR4297547	Male	Lung	Multiplex	Brain death	58	2×300	Illumina MiSeq	Leader	FR4	None
SRR4297548	Male	Bone marrow	Multiplex	Brain death	23	2×300	Illumina MiSeq	Leader	FR4	None
SRR4297549	Male	PBMC	Multiplex	Brain death	23	2×300	Illumina MiSeq	Leader	FR4	None
SRR4297550	Male	Spleen	Multiplex	Brain death	23	2×300	Illumina MiSeq	Leader	FR4	None
SRR4297551	Male	Lymph node	Multiplex	Brain death	23	2×300	Illumina MiSeq	Leader	FR4	None
SRR4297552	Male	Intestine	Multiplex	Brain death	23	2×300	Illumina MiSeq	Leader	FR4	None
SRR4297553	Male	Intestine	Multiplex	Brain death	23	2×300	Illumina MiSeq	Leader	FR4	None
SRR4297554	Male	Intestine	Multiplex	Brain death	23	2×300	Illumina MiSeq	FR1	FR4	None
SRR4297555	Male	Intestine	Multiplex	Brain death	23	2×300	Illumina MiSeq	Leader	FR4	None
SRR4297556	Male	Lung	Multiplex	Brain death	23	2×300	Illumina MiSeq	Leader	FR4	None
SRR4297557	Male	Spleen	Multiplex	Brain death	23	2×300	Illumina MiSeq	Leader	FR4	None
SRR4297558	Male	Spleen	Multiplex	Brain death	23	2×300	Illumina MiSeq	Leader	FR4	None
SRR4297559	Male	Bone marrow	Multiplex	Brain death	58	2×300	Illumina MiSeq	Leader	FR4	None
SRR4297560	Male	PBMC	Multiplex	Brain death	58	2×300	Illumina MiSeq	Leader	FR4	None
SRR4297561	Male	Spleen	Multiplex	Brain death	58	2×300	Illumina MiSeq	Leader	FR4	None
SRR4297562	Male	Lymph node	Multiplex	Brain death	58	2×300	Illumina MiSeq	Leader	FR4	None
SRR4297563	Male	Intestine	Multiplex	Brain death	58	2×300	Illumina MiSeq	Leader	FR4	None
SRR4297564	Male	Intestine	Multiplex	Brain death	23	2×300	Illumina MiSeq	FR1	FR4	None
SRR4297565	Male	Intestine	Multiplex	Brain death	58	2×300	Illumina MiSeq	Leader	FR4	None
SRR4297566	Male	Intestine	Multiplex	Brain death	58	2×300	Illumina MiSeq	Leader	FR4	None
SRR4297567	Male	Lung	Multiplex	Brain death	58	2×300	Illumina MiSeq	Leader	FR4	None
SRR4297568	Male	Bone marrow	Multiplex	Brain death	23	2×300	Illumina MiSeq	Leader	FR4	None
SRR4297569	Male	PBMC	Multiplex	Brain death	23	2×300	Illumina MiSeq	Leader	FR4	None
SRR4297570	Male	Spleen	Multiplex	Brain death	23	2×300	Illumina MiSeq	Leader	FR4	None
SRR4297571	Male	Lymph node	Multiplex	Brain death	23	2×300	Illumina MiSeq	Leader	FR4	None
SRR4297572	Male	Intestine	Multiplex	Brain death	23	2×300	Illumina MiSeq	Leader	FR4	None
SRR4297573	Male	Intestine	Multiplex	Brain death	23	2×300	Illumina MiSeq	Leader	FR4	None
SRR4297574	Male	Intestine	Multiplex	Brain death	23	2×300	Illumina MiSeq	FR1	FR4	None
SRR4297575	Male	Intestine	Multiplex	Brain death	23	2×300	Illumina MiSeq	Leader	FR4	None
SRR4297576	Male	Lung	Multiplex	Brain death	23	2×300	Illumina MiSeq	Leader	FR4	None
SRR4297577	Male	Spleen	Multiplex	Brain death	23	2×300	Illumina MiSeq	Leader	FR4	None
SRR4297578	Male	Spleen	Multiplex	Brain death	23	2×300	Illumina MiSeq	Leader	FR4	None
SRR4297579	Male	Spleen	Multiplex	Brain death	23	2×300	Illumina MiSeq	Leader	FR4	None
SRR4297580	Male	Spleen	Multiplex	Brain death	23	2×300	Illumina MiSeq	Leader	FR4	None
SRR4297581	Male	Bone marrow	Multiplex	Brain death	58	2×300	Illumina MiSeq	Leader	FR4	None
SRR4297582	Male	PBMC	Multiplex	Brain death	58	2×300	Illumina MiSeq	Leader	FR4	None
SRR4297583	Male	Spleen	Multiplex	Brain death	58	2×300	Illumina MiSeq	Leader	FR4	None
SRR4297584	Male	Intestine	Multiplex	Brain death	23	2×300	Illumina MiSeq	FR1	FR4	None
SRR4297585	Male	Lymph node	Multiplex	Brain death	58	2×300	Illumina MiSeq	Leader	FR4	None
SRR4297586	Male	Intestine	Multiplex	Brain death	58	2×300	Illumina MiSeq	Leader	FR4	None
SRR4297587	Male	Intestine	Multiplex	Brain death	58	2×300	Illumina MiSeq	Leader	FR4	None
SRR4297588	Male	Intestine	Multiplex	Brain death	58	2×300	Illumina MiSeq	Leader	FR4	None
SRR4297589	Male	Lung	Multiplex	Brain death	58	2×300	Illumina MiSeq	Leader	FR4	None
SRR4297590	Male	Bone marrow	Multiplex	Brain death	23	2×300	Illumina MiSeq	Leader	FR4	None
SRR4297591	Male	PBMC	Multiplex	Brain death	23	2×300	Illumina MiSeq	Leader	FR4	None
SRR4297592	Male	Spleen	Multiplex	Brain death	23	2×300	Illumina MiSeq	Leader	FR4	None
SRR4297593	Male	Lymph node	Multiplex	Brain death	23	2×300	Illumina MiSeq	Leader	FR4	None
SRR4297594	Male	Intestine	Multiplex	Brain death	23	2×300	Illumina MiSeq	FR1	FR4	None
SRR4297595	Male	Intestine	Multiplex	Brain death	23	2×300	Illumina MiSeq	Leader	FR4	None
SRR4297596	Male	Intestine	Multiplex	Brain death	23	2×300	Illumina MiSeq	Leader	FR4	None
SRR4297597	Male	Intestine	Multiplex	Brain death	23	2×300	Illumina MiSeq	Leader	FR4	None
SRR4297598	Male	Lung	Multiplex	Brain death	23	2×300	Illumina MiSeq	Leader	FR4	None
SRR4297599	Male	Spleen	Multiplex	Brain death	23	2×300	Illumina MiSeq	Leader	FR4	None
SRR4297600	Male	Spleen	Multiplex	Brain death	23	2×300	Illumina MiSeq	Leader	FR4	None
SRR4297601	Male	Spleen	Multiplex	Brain death	23	2×300	Illumina MiSeq	Leader	FR4	None
SRR4297602	Male	Spleen	Multiplex	Brain death	23	2×300	Illumina MiSeq	Leader	FR4	None
SRR4297603	Male	Intestine	Multiplex	Brain death	23	2×300	Illumina MiSeq	FR1	FR4	None
SRR4297604	Male	Intestine	Multiplex	Brain death	23	2×300	Illumina MiSeq	FR1	FR4	None
SRR4297605	Male	Spleen	Multiplex	Brain death	23	2×300	Illumina MiSeq	FR1	FR4	None
SRR4297606	Male	Spleen	Multiplex	Brain death	23	2×300	Illumina MiSeq	FR1	FR4	None
SRR4297607	Male	Spleen	Multiplex	Brain death	23	2×300	Illumina MiSeq	FR1	FR4	None
SRR4297608	Male	Spleen	Multiplex	Brain death	23	2×300	Illumina MiSeq	FR1	FR4	None
SRR4297609	Male	Spleen	Multiplex	Brain death	23	2×300	Illumina MiSeq	FR1	FR4	None
SRR4297610	Male	Spleen	Multiplex	Brain death	23	2×300	Illumina MiSeq	FR1	FR4	None
SRR4297611	Male	Spleen	Multiplex	Brain death	23	2×300	Illumina MiSeq	FR1	FR4	None
SRR4297612	Male	Spleen	Multiplex	Brain death	23	2×300	Illumina MiSeq	FR1	FR4	None
SRR4297613	Male	Spleen	Multiplex	Brain death	23	2×300	Illumina MiSeq	FR1	FR4	None
SRR4297614	Male	Spleen	Multiplex	Brain death	23	2×300	Illumina MiSeq	FR1	FR4	None
SRR4297615	Male	Spleen	Multiplex	Brain death	23	2×300	Illumina MiSeq	FR1	FR4	None
SRR4297616	Male	Spleen	Multiplex	Brain death	23	2×300	Illumina MiSeq	FR1	FR4	None
SRR4297617	Male	Spleen	Multiplex	Brain death	23	2×300	Illumina MiSeq	FR1	FR4	None
SRR4297618	Male	Spleen	Multiplex	Brain death	23	2×300	Illumina MiSeq	FR1	FR4	None
SRR4297619	Male	Spleen	Multiplex	Brain death	23	2×300	Illumina MiSeq	FR1	FR4	None
SRR4297620	Male	Spleen	Multiplex	Brain death	23	2×300	Illumina MiSeq	FR1	FR4	None
SRR4297621	Male	Spleen	Multiplex	Brain death	23	2×300	Illumina MiSeq	FR1	FR4	None
SRR4297622	Male	Spleen	Multiplex	Brain death	23	2×300	Illumina MiSeq	FR1	FR4	None
SRR4297623	Male	Spleen	Multiplex	Brain death	23	2×300	Illumina MiSeq	FR1	FR4	None
SRR4297624	Male	Spleen	Multiplex	Brain death	23	2×300	Illumina MiSeq	FR1	FR4	None
SRR4297625	Male	Spleen	Multiplex	Brain death	23	2×300	Illumina MiSeq	FR1	FR4	None
SRR4297626	Male	Spleen	Multiplex	Brain death	23	2×300	Illumina MiSeq	FR1	FR4	None
SRR4297627	Male	Spleen	Multiplex	Brain death	23	2×300	Illumina MiSeq	FR1	FR4	None
SRR4297628	Male	Spleen	Multiplex	Brain death	23	2×300	Illumina MiSeq	FR1	FR4	None
SRR4297629	Male	Spleen	Multiplex	Brain death	23	2×300	Illumina MiSeq	FR1	FR4	None
SRR4297630	Male	Spleen	Multiplex	Brain death	23	2×300	Illumina MiSeq	FR1	FR4	None
SRR4297631	Male	Spleen	Multiplex	Brain death	23	2×300	Illumina MiSeq	FR1	FR4	None
SRR4297632	Male	Spleen	Multiplex	Brain death	23	2×300	Illumina MiSeq	FR1	FR4	None
SRR4297633	Male	Spleen	Multiplex	Brain death	23	2×300	Illumina MiSeq	FR1	FR4	None
SRR4297634	Male	Spleen	Multiplex	Brain death	23	2×300	Illumina MiSeq	FR1	FR4	None
SRR4297635	Male	Spleen	Multiplex	Brain death	23	2×300	Illumina MiSeq	FR1	FR4	None
SRR4417615	Unknown	PBMC	RACE	HIV	Unknown	2×300	Illumina MiSeq	Unavailable	CH1	None, IGHG
SRR4417616	Unknown	PBMC	RACE	HIV	Unknown	2×300	Illumina MiSeq	Unavailable	CH1	None
SRR4417619	Unknown	PBMC	RACE	HIV	Unknown	2×300	Illumina MiSeq	Unavailable	CH1	None, IGHG
SRR4417620	Unknown	PBMC	RACE	HIV	Unknown	2×300	Illumina MiSeq	Unavailable	CH1	None
SRR4417621	Unknown	PBMC	RACE	HIV	Unknown	2×300	Illumina MiSeq	Unavailable	CH1	None
SRR4417625	Unknown	PBMC	RACE	HIV	Unknown	2×300	Illumina MiSeq	Unavailable	CH1	None
SRR4417629	Unknown	PBMC	RACE	HIV	Unknown	2×300	Illumina MiSeq	Unavailable	CH1	None, IGHG
SRR4417630	Unknown	PBMC	RACE	HIV	Unknown	2×300	Illumina MiSeq	Unavailable	CH1	None
SRR4417631	Unknown	PBMC	RACE	HIV	Unknown	2×300	Illumina MiSeq	Unavailable	CH1	None
SRR4431764	Male	PBMC	RACE	Influenza	32	2×300	Illumina MiSeq	Unavailable	CH1	IGHM, IGHA, IGHG, IGHD
SRR4431765	Male	PBMC	RACE	Influenza	32	2×300	Illumina MiSeq	Unavailable	CH1	IGHG, IGHA, IGHM, IGHD
SRR4431766	Male	PBMC	RACE	Influenza	32	2×300	Illumina MiSeq	Unavailable	CH1	IGHM, IGHA, IGHG, IGHD
SRR4431767	Male	PBMC	RACE	Influenza	32	2×300	Illumina MiSeq	Unavailable	CH1	IGHM, IGHA, IGHD, IGHG
SRR4431768	Male	PBMC	RACE	Healthy	32	2×300	Illumina MiSeq	Unavailable	CH1	IGHM, IGHA, IGHD, IGHG
SRR4431769	Male	PBMC	RACE	Influenza	32	2×300	Illumina MiSeq	Unavailable	CH1	IGHM, IGHA, IGHD, IGHG
SRR4431770	Male	PBMC	RACE	Influenza	32	2×300	Illumina MiSeq	Unavailable	CH1	IGHM, IGHA, IGHG, IGHD
SRR4431771	Male	PBMC	RACE	Influenza	32	2×300	Illumina MiSeq	Unavailable	CH1	IGHM, IGHA, IGHD, IGHG
SRR4431772	Male	PBMC	RACE	Healthy	32	2×300	Illumina MiSeq	Unavailable	CH1	IGHM, IGHA, IGHG, IGHD, None
SRR4431773	Male	PBMC	RACE	Healthy	32	2×300	Illumina MiSeq	Unavailable	CH1	IGHM, IGHA, IGHD, IGHG
SRR4431774	Male	PBMC	RACE	Influenza	55	2×300	Illumina MiSeq	Unavailable	CH1	IGHM, IGHA, IGHD, IGHG
SRR4431775	Male	PBMC	RACE	Healthy	55	2×300	Illumina MiSeq	Unavailable	CH1	IGHM, IGHA, IGHD, IGHG
SRR4431776	Male	PBMC	RACE	Influenza	55	2×300	Illumina MiSeq	Unavailable	CH1	IGHM, IGHA, IGHD, IGHG
SRR4431777	Male	PBMC	RACE	Influenza	55	2×300	Illumina MiSeq	Unavailable	CH1	IGHM, IGHA, IGHD, IGHG
SRR4431778	Male	PBMC	RACE	Influenza	55	2×300	Illumina MiSeq	Unavailable	CH1	IGHM, IGHA, IGHD, IGHG
SRR4431779	Male	PBMC	RACE	Influenza	55	2×300	Illumina MiSeq	Unavailable	CH1	IGHA, IGHM
SRR4431780	Male	PBMC	RACE	Influenza	55	2×300	Illumina MiSeq	Unavailable	CH1	IGHM, IGHD, IGHA, IGHG
SRR4431781	Male	PBMC	RACE	Influenza	55	2×300	Illumina MiSeq	Unavailable	CH1	IGHM, IGHA, IGHG, IGHD
SRR4431782	Male	PBMC	RACE	Healthy	55	2×300	Illumina MiSeq	Unavailable	CH1	IGHM, IGHA, IGHD, IGHG
SRR4431783	Male	PBMC	RACE	Healthy	55	2×300	Illumina MiSeq	Unavailable	CH1	IGHM, IGHA, IGHD, IGHG
SRR4431784	Male	PBMC	RACE	Influenza	30	2×300	Illumina MiSeq	Unavailable	CH1	IGHA, IGHM, IGHG, IGHD
SRR4431785	Male	PBMC	RACE	Influenza	30	2×300	Illumina MiSeq	Unavailable	CH1	IGHA, IGHM, IGHG, IGHD
SRR4431786	Male	PBMC	RACE	Influenza	30	2×300	Illumina MiSeq	Unavailable	CH1	IGHA, IGHM, IGHG, IGHD
SRR4431787	Male	PBMC	RACE	Healthy	30	2×300	Illumina MiSeq	Unavailable	CH1	IGHA, IGHM, IGHG, IGHD
SRR4431788	Male	PBMC	RACE	Influenza	30	2×300	Illumina MiSeq	Unavailable	CH1	IGHM, IGHA, IGHG, IGHD
SRR4431789	Male	PBMC	RACE	Influenza	30	2×300	Illumina MiSeq	Unavailable	CH1	IGHA, IGHM, IGHG, IGHD
SRR4431790	Male	PBMC	RACE	Influenza	30	2×300	Illumina MiSeq	Unavailable	CH1	IGHA, IGHG, IGHM, IGHD
SRR4431791	Male	PBMC	RACE	Influenza	30	2×300	Illumina MiSeq	Unavailable	CH1	IGHM, IGHA, IGHG, IGHD
SRR4431792	Male	PBMC	RACE	Healthy	30	2×300	Illumina MiSeq	Unavailable	CH1	IGHA, IGHM, IGHG, IGHD
SRR4431793	Male	PBMC	RACE	Healthy	30	2×300	Illumina MiSeq	Unavailable	CH1	IGHA, IGHM, IGHG, IGHD
SRR5063092	Unknown	Intestine	Multiplex	Colorectal cancer	Unknown	2×300	Illumina MiSeq	FR1	CH1	IGHM
SRR5063097	Unknown	Intestine	Multiplex	Colorectal cancer	Unknown	2×300	Illumina MiSeq	FR1	CH1	IGHM
SRR5063084	Unknown	Intestine	Multiplex	Colorectal cancer	Unknown	2×300	Illumina MiSeq	FR1	CH1	IGHM
SRR5063082	Unknown	Intestine	Multiplex	Colorectal cancer	Unknown	2×250	Illumina MiSeq	FR1	CH1	IGHA
SRR5063083	Unknown	Intestine	Multiplex	Colorectal cancer	Unknown	2×250	Illumina MiSeq	FR1	CH1	IGHA
SRR5063085	Unknown	Intestine	Multiplex	Colorectal cancer	Unknown	2×250	Illumina MiSeq	FR1	CH1	IGHM
SRR5063086	Unknown	Intestine	Multiplex	Colorectal cancer	Unknown	2×250	Illumina MiSeq	FR1	CH1	IGHA, IGHM
SRR5063087	Unknown	Intestine	Multiplex	Colorectal cancer	Unknown	2×250	Illumina MiSeq	FR1	CH1	IGHM, IGHA
SRR5063088	Unknown	Intestine	Multiplex	Colorectal cancer	Unknown	2×250	Illumina MiSeq	FR1	CH1	IGHA
SRR5063089	Unknown	Intestine	Multiplex	Colorectal cancer	Unknown	2×250	Illumina MiSeq	FR1	CH1	IGHM
SRR5063090	Unknown	Intestine	Multiplex	Colorectal cancer	Unknown	2×250	Illumina MiSeq	FR1	CH1	IGHM
SRR5063091	Unknown	Intestine	Multiplex	Colorectal cancer	Unknown	2×250	Illumina MiSeq	FR1	CH1	IGHA
SRR5063093	Unknown	Intestine	Multiplex	Colorectal cancer	Unknown	2×250	Illumina MiSeq	FR1	CH1	IGHA
SRR5063094	Unknown	Intestine	Multiplex	Colorectal cancer	Unknown	2×250	Illumina MiSeq	FR1	CH1	IGHM, IGHA
SRR5063096	Unknown	Intestine	Multiplex	Colorectal cancer	Unknown	2×250	Illumina MiSeq	FR1	CH1	IGHA, IGHM
SRR5063098	Unknown	Intestine	Multiplex	Colorectal cancer	Unknown	2×250	Illumina MiSeq	FR1	CH1	IGHM
SRR5063099	Unknown	Intestine	Multiplex	Colorectal cancer	Unknown	2×250	Illumina MiSeq	FR1	CH1	IGHA
SRR5063100	Unknown	Intestine	Multiplex	Colorectal cancer	Unknown	2×250	Illumina MiSeq	FR1	CH1	IGHA
SRR5063101	Unknown	Intestine	Multiplex	Colorectal cancer	Unknown	2×250	Illumina MiSeq	FR1	CH1	IGHA, IGHM
SRR5063102	Unknown	Intestine	Multiplex	Colorectal cancer	Unknown	2×250	Illumina MiSeq	FR1	CH1	IGHM
SRR5063103	Unknown	Intestine	Multiplex	Colorectal cancer	Unknown	2×250	Illumina MiSeq	FR1	CH1	IGHM, IGHA
SRR5063104	Unknown	Intestine	Multiplex	Colorectal cancer	Unknown	2×250	Illumina MiSeq	FR1	CH1	IGHA
SRR5063105	Unknown	Intestine	Multiplex	Colorectal cancer	Unknown	2×250	Illumina MiSeq	FR1	CH1	IGHM
SRR5063106	Unknown	Intestine	Multiplex	Colorectal cancer	Unknown	2×250	Illumina MiSeq	FR1	CH1	IGHA
SRR5063107	Unknown	Intestine	Multiplex	Colorectal cancer	Unknown	2×250	Illumina MiSeq	FR1	CH1	IGHA
SRR5063110	Unknown	Intestine	Multiplex	Colorectal cancer	Unknown	2×250	Illumina MiSeq	FR1	CH1	IGHM
SRR5063111	Unknown	Intestine	Multiplex	Colorectal cancer	Unknown	2×250	Illumina MiSeq	FR1	CH1	IGHM
SRR5063112	Unknown	Intestine	Multiplex	Colorectal cancer	Unknown	2×250	Illumina MiSeq	FR1	CH1	IGHM
SRR5063114	Unknown	Intestine	Multiplex	Colorectal cancer	Unknown	2×250	Illumina MiSeq	FR1	CH1	IGHM
SRR5063115	Unknown	Intestine	Multiplex	Colorectal cancer	Unknown	2×250	Illumina MiSeq	FR1	CH1	IGHA
SRR5063116	Unknown	Intestine	Multiplex	Colorectal cancer	Unknown	2×250	Illumina MiSeq	FR1	CH1	IGHA
SRR5063095	Unknown	Intestine	Multiplex	Colorectal cancer	Unknown	2×250	Illumina MiSeq	FR1	CH1	IGHM
SRR5063109	Unknown	Intestine	Multiplex	Colorectal cancer	Unknown	2×250	Illumina MiSeq	FR1	CH1	IGHA
SRR5063113	Unknown	Intestine	Multiplex	Colorectal cancer	Unknown	2×250	Illumina MiSeq	FR1	CH1	IGHM
SRR5408019	Unknown	PBMC	Multiplex	Healthy	66	325+275	Illumina MiSeq	Leader	CH1	IGHM
SRR5408020	Unknown	PBMC	Multiplex	Healthy	57	325+275	Illumina MiSeq	Leader	CH1	IGHM, None
SRR5408021	Unknown	PBMC	Multiplex	Healthy	59	325+275	Illumina MiSeq	Leader	CH1	IGHM, None
SRR5408022	Unknown	PBMC	Multiplex	Healthy	Unknown	325+275	Illumina MiSeq	Leader	CH1	IGHM, None
SRR5408023	Unknown	PBMC	Multiplex	Healthy	Unknown	325+275	Illumina MiSeq	Leader	CH1	IGHM, None
SRR5408024	Unknown	PBMC	Multiplex	Healthy	Unknown	325+275	Illumina MiSeq	Leader	CH1	IGHM, None
SRR5408025	Unknown	PBMC	Multiplex	Healthy	58	325+275	Illumina MiSeq	Leader	CH1	IGHM, None
SRR5408026	Unknown	PBMC	Multiplex	Healthy	59	325+275	Illumina MiSeq	Leader	CH1	IGHM, None
SRR5408027	Unknown	PBMC	Multiplex	Healthy	36	325+275	Illumina MiSeq	Leader	CH1	IGHM, None
SRR5408028	Unknown	PBMC	Multiplex	Healthy	35	325+275	Illumina MiSeq	Leader	CH1	IGHM, None
SRR5408029	Unknown	PBMC	Multiplex	Healthy	38	325+275	Illumina MiSeq	Leader	CH1	IGHM, None
SRR5811752	Unknown	PBMC	RACE	Healthy	Unknown	2×300	Illumina MiSeq	Unavailable	CH1	IGHA
SRR5811755	Unknown	Cord blood	RACE	Healthy	Unknown	2×300	Illumina MiSeq	Unavailable	CH1	IGHM, None
SRR5811756	Unknown	Cord blood	RACE	Healthy	Unknown	2×300	Illumina MiSeq	Unavailable	CH1	IGHG, IGHA
SRR5811757	Unknown	PBMC	RACE	Healthy	Unknown	2×300	Illumina MiSeq	Unavailable	CH1	IGHM, IGHA, IGHG
SRR5811758	Unknown	PBMC	RACE	Healthy	Unknown	2×300	Illumina MiSeq	Unavailable	CH1	IGHM, IGHG, IGHA, None
SRR5811759	Unknown	PBMC	RACE	Healthy	Unknown	2×300	Illumina MiSeq	Unavailable	CH1	IGHM, IGHG, IGHA
SRR5811760	Unknown	PBMC	RACE	Healthy	Unknown	2×300	Illumina MiSeq	Unavailable	CH1	IGHM, IGHG, IGHA, None
SRR5811761	Unknown	PBMC	RACE	Healthy	Unknown	2×300	Illumina MiSeq	Unavailable	CH1	IGHM, IGHA, IGHG, None
SRR5811762	Unknown	PBMC	RACE	HIV	Unknown	2×300	Illumina MiSeq	Unavailable	CH1	IGHM, IGHG, IGHA, None
SRR5811763	Unknown	PBMC	RACE	Healthy	Unknown	2×300	Illumina MiSeq	Unavailable	CH1	IGHM, IGHA, IGHG, None
SRR5811764	Unknown	PBMC	RACE	Healthy	Unknown	2×300	Illumina MiSeq	Unavailable	CH1	IGHG, IGHM, IGHA, None
SRR5811765	Unknown	PBMC	RACE	HIV	Unknown	2×300	Illumina MiSeq	Unavailable	CH1	IGHM, IGHG, IGHA, None
SRR5811766	Unknown	Cord blood	RACE	Healthy	Unknown	2×300	Illumina MiSeq	Unavailable	CH1	IGHM, None, IGHG
SRR5811767	Unknown	Cord blood	RACE	Healthy	Unknown	2×300	Illumina MiSeq	Unavailable	CH1	IGHM, None
SRR5811768	Unknown	Cord blood	RACE	Healthy	Unknown	2×300	Illumina MiSeq	Unavailable	CH1	IGHM
SRR5811769	Unknown	Cord blood	RACE	Healthy	Unknown	2×300	Illumina MiSeq	Unavailable	CH1	IGHM, None
SRR5811770	Unknown	PBMC	RACE	Healthy	Unknown	2×300	Illumina MiSeq	Unavailable	CH1	IGHM, IGHG, IGHA
SRR5811771	Unknown	PBMC	RACE	Healthy	Unknown	2×300	Illumina MiSeq	Unavailable	CH1	IGHM, IGHA, IGHG, None
SRR5811772	Unknown	PBMC	RACE	Healthy	Unknown	2×300	Illumina MiSeq	Unavailable	CH1	IGHA
SRR5811773	Unknown	PBMC	RACE	Healthy	Unknown	2×300	Illumina MiSeq	Unavailable	CH1	IGHA
SRR5811774	Unknown	PBMC	RACE	HIV	Unknown	2×300	Illumina MiSeq	Unavailable	CH1	IGHM, IGHG, IGHA, None
SRR5811775	Unknown	PBMC	RACE	Healthy	Unknown	2×300	Illumina MiSeq	Unavailable	CH1	IGHM, IGHA, IGHG, None
SRR5811776	Unknown	PBMC	RACE	Healthy	Unknown	2×300	Illumina MiSeq	Unavailable	CH1	IGHM, IGHA, IGHG, None
SRR5811777	Unknown	PBMC	RACE	Healthy	Unknown	2×300	Illumina MiSeq	Unavailable	CH1	IGHM, IGHA, IGHG, None
SRR5811781	Unknown	PBMC	RACE	Healthy	Unknown	2×300	Illumina MiSeq	Unavailable	CH1	IGHM, IGHA, IGHG, None
SRR5811782	Unknown	PBMC	RACE	HIV	Unknown	2×300	Illumina MiSeq	Unavailable	CH1	IGHM, IGHG, None
SRR5811783	Unknown	PBMC	RACE	Healthy	Unknown	2×300	Illumina MiSeq	Unavailable	CH1	IGHG, None
SRR5811784	Unknown	PBMC	RACE	Healthy	Unknown	2×300	Illumina MiSeq	Unavailable	CH1	IGHM, IGHG, None
SRR5811785	Unknown	PBMC	RACE	Healthy	Unknown	2×300	Illumina MiSeq	Unavailable	CH1	IGHM, IGHG, None
SRR5811786	Unknown	PBMC	RACE	Healthy	Unknown	2×300	Illumina MiSeq	Unavailable	CH1	IGHM, IGHG, None
SRR5811789	Unknown	PBMC	RACE	Healthy	Unknown	2×300	Illumina MiSeq	Unavailable	CH1	IGHM, IGHG, None
SRR5811790	Unknown	PBMC	RACE	Healthy	Unknown	2×300	Illumina MiSeq	Unavailable	CH1	IGHM, IGHG, None
SRR5811791	Unknown	PBMC	RACE	Healthy	Unknown	2×300	Illumina MiSeq	Unavailable	CH1	IGHM, IGHG, None
SRR6387556	Unknown	PBMC	RACE	Healthy	Unknown	2×300	Illumina MiSeq	Unavailable	CH1	IGHG, IGHM, IGHA
SRR6387557	Unknown	Cord blood	RACE	Healthy	Unknown	2×300	Illumina MiSeq	Unavailable	CH1	IGHM, None
SRR5851422	Female	PBMC	RACE	Healthy	23	2×300	Illumina MiSeq	Unavailable	CH1	None
SRR5888724	Unknown	PBMC	Multiplex	HIV	Unknown	2×300	Illumina MiSeq	FR1	CH1	None, IGHG
SRR5888725	Unknown	PBMC	Multiplex	HIV	Unknown	2×300	Illumina MiSeq	FR1	CH1	None, IGHG, IGHM
SRR5888726	Unknown	PBMC	Multiplex	HIV	Unknown	2×300	Illumina MiSeq	FR1	CH1	None, IGHG
SRR5888727	Unknown	PBMC	Multiplex	HIV	Unknown	2×300	Illumina MiSeq	FR1	CH1	None, IGHG, IGHM
SRR5888728	Unknown	PBMC	Multiplex	HIV	Unknown	2×300	Illumina MiSeq	FR1	CH1	None, IGHG, IGHM
SRR5888729	Unknown	PBMC	Multiplex	HIV	Unknown	2×300	Illumina MiSeq	FR1	CH1	None, IGHG, IGHM
SRR5888730	Unknown	PBMC	Multiplex	HIV	Unknown	2×300	Illumina MiSeq	FR1	CH1	None, IGHG
SRR5888731	Unknown	PBMC	Multiplex	HIV	Unknown	2×300	Illumina MiSeq	FR1	CH1	None, IGHG
SRR5888732	Unknown	PBMC	Multiplex	HIV	Unknown	2×300	Illumina MiSeq	FR1	CH1	None, IGHG
SRR5888733	Unknown	PBMC	Multiplex	HIV	Unknown	2×300	Illumina MiSeq	FR1	CH1	None, IGHG
SRR5888734	Unknown	PBMC	Multiplex	HIV	Unknown	2×300	Illumina MiSeq	FR1	CH1	None, IGHG
SRR5888735	Unknown	PBMC	Multiplex	HIV	Unknown	2×300	Illumina MiSeq	FR1	CH1	None, IGHG
SRR5888736	Unknown	PBMC	Multiplex	HIV	Unknown	2×300	Illumina MiSeq	FR1	CH1	None, IGHG
SRR8283607	Female	PBMC	Multiplex	Healthy	18	2×250	Illumina HiSeq	FR1	CH1	IGHM, None, IGHG
SRR8283608	Female	PBMC	Multiplex	Healthy	18	2×250	Illumina HiSeq	FR1	CH1	IGHM, None, IGHG
SRR8283609	Female	PBMC	Multiplex	Healthy	18	2×250	Illumina HiSeq	FR1	CH1	IGHM, None, IGHG
SRR8283610	Female	PBMC	Multiplex	Healthy	18	2×250	Illumina HiSeq	FR1	CH1	IGHM, None, IGHG
SRR8283611	Female	PBMC	Multiplex	Healthy	18	2×250	Illumina HiSeq	FR1	CH1	IGHM, None, IGHG
SRR8283612	Female	PBMC	Multiplex	Healthy	18	2×250	Illumina HiSeq	FR1	CH1	IGHM, None, IGHG
SRR8283613	Female	PBMC	Multiplex	Healthy	18	2×250	Illumina HiSeq	FR1	CH1	IGHM, None, IGHG
SRR8283614	Female	PBMC	Multiplex	Healthy	18	2×250	Illumina HiSeq	FR1	CH1	IGHM, None, IGHG
SRR8283615	Female	PBMC	Multiplex	Healthy	18	2×250	Illumina HiSeq	FR1	CH1	IGHM, None, IGHG
SRR8283616	Female	PBMC	Multiplex	Healthy	18	2×250	Illumina HiSeq	FR1	CH1	IGHM, None, IGHG
SRR8283617	Female	PBMC	Multiplex	Healthy	18	2×250	Illumina HiSeq	FR1	CH1	IGHM, None, IGHG
SRR8283618	Female	PBMC	Multiplex	Healthy	18	2×250	Illumina HiSeq	FR1	CH1	IGHM, None, IGHG
SRR8283755	Male	PBMC	Multiplex	Healthy	29	2×250	Illumina HiSeq	FR1	CH1	IGHM, None, IGHG
SRR8283756	Male	PBMC	Multiplex	Healthy	29	2×250	Illumina HiSeq	FR1	CH1	IGHM, None, IGHG
SRR8283757	Male	PBMC	Multiplex	Healthy	29	2×250	Illumina HiSeq	FR1	CH1	IGHM, None, IGHG
SRR8283758	Male	PBMC	Multiplex	Healthy	29	2×250	Illumina HiSeq	FR1	CH1	IGHM, None, IGHG
SRR8283759	Male	PBMC	Multiplex	Healthy	29	2×250	Illumina HiSeq	FR1	CH1	IGHM, None, IGHG
SRR8283760	Male	PBMC	Multiplex	Healthy	29	2×250	Illumina HiSeq	FR1	CH1	IGHM, None, IGHG
SRR8283761	Male	PBMC	Multiplex	Healthy	29	2×250	Illumina HiSeq	FR1	CH1	IGHM, None, IGHG
SRR8283762	Male	PBMC	Multiplex	Healthy	29	2×250	Illumina HiSeq	FR1	CH1	IGHM, None, IGHG
SRR8283763	Male	PBMC	Multiplex	Healthy	29	2×250	Illumina HiSeq	FR1	CH1	IGHM, None, IGHG
SRR8283764	Male	PBMC	Multiplex	Healthy	29	2×250	Illumina HiSeq	FR1	CH1	IGHM, None, IGHG
SRR8283765	Male	PBMC	Multiplex	Healthy	29	2×250	Illumina HiSeq	FR1	CH1	IGHM, None, IGHG
SRR8283766	Male	PBMC	Multiplex	Healthy	29	2×250	Illumina HiSeq	FR1	CH1	IGHM, None, IGHG
SRR8283767	Male	PBMC	Multiplex	Healthy	29	2×250	Illumina HiSeq	FR1	CH1	IGHM, None, IGHG
SRR8283768	Male	PBMC	Multiplex	Healthy	29	2×250	Illumina HiSeq	FR1	CH1	IGHM, None, IGHG
SRR8283769	Male	PBMC	Multiplex	Healthy	29	2×250	Illumina HiSeq	FR1	CH1	IGHM, None, IGHG
SRR8283790	Male	PBMC	Multiplex	Healthy	18	2×250	Illumina HiSeq	FR1	CH1	IGHM, None, IGHG, IGHE
SRR8283825	Female	PBMC	Multiplex	Healthy	30	2×250	Illumina HiSeq	FR1	CH1	IGHM, None, IGHG, IGHE
SRR8283826	Female	PBMC	Multiplex	Healthy	30	2×250	Illumina HiSeq	FR1	CH1	IGHM, None, IGHG
SRR8283827	Female	PBMC	Multiplex	Healthy	30	2×250	Illumina HiSeq	FR1	CH1	IGHM, None, IGHG
SRR8283828	Female	PBMC	Multiplex	Healthy	30	2×250	Illumina HiSeq	FR1	CH1	IGHM, None, IGHG, IGHE
SRR8283829	Female	PBMC	Multiplex	Healthy	30	2×250	Illumina HiSeq	FR1	CH1	IGHM, None, IGHG, IGHE
SRR8283830	Female	PBMC	Multiplex	Healthy	30	2×250	Illumina HiSeq	FR1	CH1	IGHM, None, IGHG, IGHE
SRR8283831	Female	PBMC	Multiplex	Healthy	30	2×250	Illumina HiSeq	FR1	CH1	IGHM, None, IGHG, IGHE
SRR8283832	Female	PBMC	Multiplex	Healthy	30	2×250	Illumina HiSeq	FR1	CH1	IGHM, None, IGHG
SRR8283833	Female	PBMC	Multiplex	Healthy	30	2×250	Illumina HiSeq	FR1	CH1	IGHM, None, IGHG
SRR8283834	Female	PBMC	Multiplex	Healthy	30	2×250	Illumina HiSeq	FR1	CH1	IGHM, None, IGHG
SRR8283835	Female	PBMC	Multiplex	Healthy	30	2×250	Illumina HiSeq	FR1	CH1	IGHM, None, IGHG
SRR8283836	Female	PBMC	Multiplex	Healthy	30	2×250	Illumina HiSeq	FR1	CH1	IGHM, None, IGHG
SRR8283837	Female	PBMC	Multiplex	Healthy	30	2×250	Illumina HiSeq	FR1	CH1	IGHM, None, IGHG
SRR8283838	Female	PBMC	Multiplex	Healthy	30	2×250	Illumina HiSeq	FR1	CH1	IGHM, None, IGHG
SRR8283843	Male	PBMC	Multiplex	Healthy	29	2×250	Illumina HiSeq	FR1	CH1	IGHM, None, IGHG
SRR8283844	Male	PBMC	Multiplex	Healthy	29	2×250	Illumina HiSeq	FR1	CH1	IGHM, None, IGHG
SRR8283845	Male	PBMC	Multiplex	Healthy	29	2×250	Illumina HiSeq	FR1	CH1	IGHM, None, IGHG
SRR8283846	Male	PBMC	Multiplex	Healthy	29	2×250	Illumina HiSeq	FR1	CH1	IGHM, None, IGHG
SRR8283847	Male	PBMC	Multiplex	Healthy	29	2×250	Illumina HiSeq	FR1	CH1	IGHM, None, IGHG
SRR8283848	Male	PBMC	Multiplex	Healthy	29	2×250	Illumina HiSeq	FR1	CH1	IGHM, None, IGHG
SRR8283849	Male	PBMC	Multiplex	Healthy	29	2×250	Illumina HiSeq	FR1	CH1	IGHM, None, IGHG
SRR8283850	Male	PBMC	Multiplex	Healthy	29	2×250	Illumina HiSeq	FR1	CH1	IGHM, None, IGHG
SRR8283851	Male	PBMC	Multiplex	Healthy	29	2×250	Illumina HiSeq	FR1	CH1	IGHM, None, IGHG
SRR8283852	Male	PBMC	Multiplex	Healthy	29	2×250	Illumina HiSeq	FR1	CH1	IGHM, None, IGHG
SRR8283853	Male	PBMC	Multiplex	Healthy	29	2×250	Illumina HiSeq	FR1	CH1	IGHM, None, IGHG
SRR8283854	Male	PBMC	Multiplex	Healthy	29	2×250	Illumina HiSeq	FR1	CH1	IGHM, None, IGHG
SRR8283855	Male	PBMC	Multiplex	Healthy	29	2×250	Illumina HiSeq	FR1	CH1	IGHM, None, IGHG
SRR8283856	Male	PBMC	Multiplex	Healthy	29	2×250	Illumina HiSeq	FR1	CH1	IGHM, None, IGHG
SRR8283857	Male	PBMC	Multiplex	Healthy	29	2×250	Illumina HiSeq	FR1	CH1	IGHM, None, IGHG
SRR8283858	Male	PBMC	Multiplex	Healthy	29	2×250	Illumina HiSeq	FR1	CH1	IGHM, None, IGHG
SRR8283859	Male	PBMC	Multiplex	Healthy	29	2×250	Illumina HiSeq	FR1	CH1	IGHM, None, IGHG
SRR8283860	Male	PBMC	Multiplex	Healthy	29	2×250	Illumina HiSeq	FR1	CH1	IGHM, None, IGHG
SRR8283869	Male	PBMC	Multiplex	Healthy	25	2×250	Illumina HiSeq	FR1	CH1	IGHM, None, IGHG
SRR8283870	Male	PBMC	Multiplex	Healthy	25	2×250	Illumina HiSeq	FR1	CH1	IGHM, None, IGHG
SRR8283871	Male	PBMC	Multiplex	Healthy	25	2×250	Illumina HiSeq	FR1	CH1	IGHM, None, IGHG
SRR8283872	Male	PBMC	Multiplex	Healthy	25	2×250	Illumina HiSeq	FR1	CH1	IGHM, None, IGHG
SRR8283873	Male	PBMC	Multiplex	Healthy	25	2×250	Illumina HiSeq	FR1	CH1	IGHM, None, IGHG
SRR8283874	Male	PBMC	Multiplex	Healthy	25	2×250	Illumina HiSeq	FR1	CH1	IGHM, None, IGHG
SRR8283875	Male	PBMC	Multiplex	Healthy	25	2×250	Illumina HiSeq	FR1	CH1	IGHM, None, IGHG
SRR8283876	Male	PBMC	Multiplex	Healthy	25	2×250	Illumina HiSeq	FR1	CH1	IGHM, None, IGHG
SRR8283877	Male	PBMC	Multiplex	Healthy	25	2×250	Illumina HiSeq	FR1	CH1	IGHM, None, IGHG
SRR8283878	Male	PBMC	Multiplex	Healthy	25	2×250	Illumina HiSeq	FR1	CH1	IGHM, None, IGHG
SRR8283879	Male	PBMC	Multiplex	Healthy	25	2×250	Illumina HiSeq	FR1	CH1	IGHM, None, IGHG
SRR8283880	Male	PBMC	Multiplex	Healthy	25	2×250	Illumina HiSeq	FR1	CH1	IGHM, None, IGHG
SRR8283881	Male	PBMC	Multiplex	Healthy	25	2×250	Illumina HiSeq	FR1	CH1	IGHM, None, IGHG
SRR8283882	Male	PBMC	Multiplex	Healthy	25	2×250	Illumina HiSeq	FR1	CH1	IGHM, None, IGHG
SRR8283883	Male	PBMC	Multiplex	Healthy	25	2×250	Illumina HiSeq	FR1	CH1	IGHM, None, IGHG
SRR8283884	Male	PBMC	Multiplex	Healthy	25	2×250	Illumina HiSeq	FR1	CH1	IGHM, None, IGHG
SRR8283885	Male	PBMC	Multiplex	Healthy	25	2×250	Illumina HiSeq	FR1	CH1	IGHM, None, IGHG
SRR8283886	Male	PBMC	Multiplex	Healthy	25	2×250	Illumina HiSeq	FR1	CH1	IGHM, None, IGHG
SRR8283606	Female	PBMC	Multiplex	Healthy	18	2×250	Illumina HiSeq	FR1	CH1	IGHM, None, IGHG, IGHE
SRR8283601	Female	PBMC	Multiplex	Healthy	18	2×250	Illumina HiSeq	FR1	CH1	IGHM, None, IGHG
SRR8283602	Female	PBMC	Multiplex	Healthy	18	2×250	Illumina HiSeq	FR1	CH1	IGHM, None, IGHG
SRR8283603	Female	PBMC	Multiplex	Healthy	18	2×250	Illumina HiSeq	FR1	CH1	IGHM, None, IGHG
SRR8283604	Female	PBMC	Multiplex	Healthy	18	2×250	Illumina HiSeq	FR1	CH1	IGHM, None, IGHG
SRR8283605	Female	PBMC	Multiplex	Healthy	18	2×250	Illumina HiSeq	FR1	CH1	IGHM, None, IGHG
SRR8283619	Female	PBMC	Multiplex	Healthy	21	2×250	Illumina HiSeq	FR1	CH1	IGHM, None, IGHG
SRR8283620	Female	PBMC	Multiplex	Healthy	21	2×250	Illumina HiSeq	FR1	CH1	IGHM, None, IGHG
SRR8283621	Female	PBMC	Multiplex	Healthy	21	2×250	Illumina HiSeq	FR1	CH1	IGHM, None, IGHG
SRR8283622	Female	PBMC	Multiplex	Healthy	21	2×250	Illumina HiSeq	FR1	CH1	IGHM, None, IGHG
SRR8283623	Female	PBMC	Multiplex	Healthy	21	2×250	Illumina HiSeq	FR1	CH1	IGHM, None, IGHG
SRR8283624	Female	PBMC	Multiplex	Healthy	21	2×250	Illumina HiSeq	FR1	CH1	IGHM, None, IGHG
SRR8283625	Female	PBMC	Multiplex	Healthy	21	2×250	Illumina HiSeq	FR1	CH1	IGHM, None, IGHG
SRR8283626	Female	PBMC	Multiplex	Healthy	21	2×250	Illumina HiSeq	FR1	CH1	IGHM, None, IGHG
SRR8283627	Female	PBMC	Multiplex	Healthy	21	2×250	Illumina HiSeq	FR1	CH1	IGHM, None, IGHG
SRR8283628	Female	PBMC	Multiplex	Healthy	21	2×250	Illumina HiSeq	FR1	CH1	IGHM, None, IGHG
SRR8283629	Female	PBMC	Multiplex	Healthy	21	2×250	Illumina HiSeq	FR1	CH1	IGHM, None, IGHG
SRR8283630	Female	PBMC	Multiplex	Healthy	21	2×250	Illumina HiSeq	FR1	CH1	IGHM, None, IGHG
SRR8283631	Female	PBMC	Multiplex	Healthy	21	2×250	Illumina HiSeq	FR1	CH1	IGHM, None, IGHG
SRR8283632	Female	PBMC	Multiplex	Healthy	21	2×250	Illumina HiSeq	FR1	CH1	IGHM, None, IGHG
SRR8283633	Female	PBMC	Multiplex	Healthy	21	2×250	Illumina HiSeq	FR1	CH1	IGHM, None, IGHG
SRR8283634	Female	PBMC	Multiplex	Healthy	21	2×250	Illumina HiSeq	FR1	CH1	IGHM, None, IGHG
SRR8283635	Female	PBMC	Multiplex	Healthy	21	2×250	Illumina HiSeq	FR1	CH1	IGHM, None, IGHG
SRR8283636	Female	PBMC	Multiplex	Healthy	21	2×250	Illumina HiSeq	FR1	CH1	IGHM, None, IGHG
SRR8283637	Female	PBMC	Multiplex	Healthy	21	2×250	Illumina HiSeq	FR1	CH1	IGHM, None, IGHG
SRR8283638	Female	PBMC	Multiplex	Healthy	21	2×250	Illumina HiSeq	FR1	CH1	IGHM, None, IGHG
SRR8283639	Female	PBMC	Multiplex	Healthy	21	2×250	Illumina HiSeq	FR1	CH1	IGHM, None, IGHG
SRR8283640	Female	PBMC	Multiplex	Healthy	21	2×250	Illumina HiSeq	FR1	CH1	IGHM, None, IGHG
SRR8283641	Female	PBMC	Multiplex	Healthy	21	2×250	Illumina HiSeq	FR1	CH1	IGHM, None, IGHG
SRR8283642	Female	PBMC	Multiplex	Healthy	21	2×250	Illumina HiSeq	FR1	CH1	IGHM, None, IGHG
SRR8283643	Female	PBMC	Multiplex	Healthy	21	2×250	Illumina HiSeq	FR1	CH1	IGHM, None, IGHG
SRR8283644	Female	PBMC	Multiplex	Healthy	21	2×250	Illumina HiSeq	FR1	CH1	IGHM, None, IGHG
SRR8283645	Female	PBMC	Multiplex	Healthy	21	2×250	Illumina HiSeq	FR1	CH1	IGHM, None, IGHG
SRR8283646	Female	PBMC	Multiplex	Healthy	21	2×250	Illumina HiSeq	FR1	CH1	IGHM, None, IGHG
SRR8283647	Female	PBMC	Multiplex	Healthy	21	2×250	Illumina HiSeq	FR1	CH1	IGHM, None, IGHG
SRR8283648	Female	PBMC	Multiplex	Healthy	21	2×250	Illumina HiSeq	FR1	CH1	IGHM, None, IGHG
SRR8283649	Female	PBMC	Multiplex	Healthy	21	2×250	Illumina HiSeq	FR1	CH1	IGHM, None, IGHG
SRR8283650	Female	PBMC	Multiplex	Healthy	21	2×250	Illumina HiSeq	FR1	CH1	IGHM, None, IGHG
SRR8283651	Female	PBMC	Multiplex	Healthy	21	2×250	Illumina HiSeq	FR1	CH1	IGHM, None, IGHG
SRR8283652	Female	PBMC	Multiplex	Healthy	21	2×250	Illumina HiSeq	FR1	CH1	IGHM, None, IGHG
SRR8283653	Female	PBMC	Multiplex	Healthy	21	2×250	Illumina HiSeq	FR1	CH1	IGHM, None, IGHG
SRR8283654	Female	PBMC	Multiplex	Healthy	21	2×250	Illumina HiSeq	FR1	CH1	IGHM, None, IGHG
SRR8283655	Female	PBMC	Multiplex	Healthy	25	2×250	Illumina HiSeq	FR1	CH1	IGHM, None, IGHG, IGHE
SRR8283656	Female	PBMC	Multiplex	Healthy	25	2×250	Illumina HiSeq	FR1	CH1	IGHM, None, IGHG, IGHE
SRR8283657	Female	PBMC	Multiplex	Healthy	25	2×250	Illumina HiSeq	FR1	CH1	IGHM, None, IGHG, IGHE
SRR8283658	Female	PBMC	Multiplex	Healthy	25	2×250	Illumina HiSeq	FR1	CH1	IGHM, None, IGHG, IGHE
SRR8283659	Female	PBMC	Multiplex	Healthy	25	2×250	Illumina HiSeq	FR1	CH1	IGHM, None, IGHG, IGHE
SRR8283660	Female	PBMC	Multiplex	Healthy	25	2×250	Illumina HiSeq	FR1	CH1	IGHM, None, IGHG, IGHE
SRR8283661	Female	PBMC	Multiplex	Healthy	25	2×250	Illumina HiSeq	FR1	CH1	IGHM, None, IGHG, IGHE
SRR8283662	Female	PBMC	Multiplex	Healthy	25	2×250	Illumina HiSeq	FR1	CH1	IGHM, None, IGHG, IGHE
SRR8283663	Female	PBMC	Multiplex	Healthy	25	2×250	Illumina HiSeq	FR1	CH1	IGHM, None, IGHG, IGHE
SRR8283664	Female	PBMC	Multiplex	Healthy	25	2×250	Illumina HiSeq	FR1	CH1	IGHM, None, IGHG, IGHE
SRR8283665	Female	PBMC	Multiplex	Healthy	25	2×250	Illumina HiSeq	FR1	CH1	IGHM, None, IGHG, IGHE
SRR8283666	Female	PBMC	Multiplex	Healthy	25	2×250	Illumina HiSeq	FR1	CH1	IGHM, None, IGHG, IGHE
SRR8283667	Female	PBMC	Multiplex	Healthy	25	2×250	Illumina HiSeq	FR1	CH1	IGHM, None, IGHG
SRR8283668	Female	PBMC	Multiplex	Healthy	25	2×250	Illumina HiSeq	FR1	CH1	IGHM, None, IGHG
SRR8283669	Female	PBMC	Multiplex	Healthy	25	2×250	Illumina HiSeq	FR1	CH1	IGHM, None, IGHG, IGHE
SRR8283670	Female	PBMC	Multiplex	Healthy	25	2×250	Illumina HiSeq	FR1	CH1	IGHM, None, IGHG, IGHE
SRR8283671	Female	PBMC	Multiplex	Healthy	25	2×250	Illumina HiSeq	FR1	CH1	IGHM, None, IGHG, IGHE
SRR8283672	Female	PBMC	Multiplex	Healthy	25	2×250	Illumina HiSeq	FR1	CH1	IGHM, None, IGHG, IGHE
SRR8283727	Female	PBMC	Multiplex	Healthy	29	2×250	Illumina HiSeq	FR1	CH1	IGHM, None, IGHG
SRR8283728	Female	PBMC	Multiplex	Healthy	29	2×250	Illumina HiSeq	FR1	CH1	IGHM, None, IGHG
SRR8283729	Female	PBMC	Multiplex	Healthy	29	2×250	Illumina HiSeq	FR1	CH1	IGHM, None, IGHG
SRR8283730	Female	PBMC	Multiplex	Healthy	29	2×250	Illumina HiSeq	FR1	CH1	IGHM, None, IGHG
SRR8283731	Female	PBMC	Multiplex	Healthy	29	2×250	Illumina HiSeq	FR1	CH1	IGHM, None, IGHG
SRR8283732	Female	PBMC	Multiplex	Healthy	29	2×250	Illumina HiSeq	FR1	CH1	IGHM, None, IGHG
SRR8283733	Female	PBMC	Multiplex	Healthy	29	2×250	Illumina HiSeq	FR1	CH1	IGHM, None, IGHG
SRR8283734	Female	PBMC	Multiplex	Healthy	29	2×250	Illumina HiSeq	FR1	CH1	IGHM, None, IGHG
SRR8283735	Female	PBMC	Multiplex	Healthy	29	2×250	Illumina HiSeq	FR1	CH1	IGHM, None, IGHG
SRR8283736	Female	PBMC	Multiplex	Healthy	29	2×250	Illumina HiSeq	FR1	CH1	IGHM, None, IGHG
SRR8283737	Female	PBMC	Multiplex	Healthy	29	2×250	Illumina HiSeq	FR1	CH1	IGHM, None, IGHG
SRR8283738	Female	PBMC	Multiplex	Healthy	29	2×250	Illumina HiSeq	FR1	CH1	IGHM, None, IGHG
SRR8283739	Female	PBMC	Multiplex	Healthy	29	2×250	Illumina HiSeq	FR1	CH1	IGHM, None, IGHG
SRR8283740	Female	PBMC	Multiplex	Healthy	29	2×250	Illumina HiSeq	FR1	CH1	IGHM, None, IGHG
SRR8283741	Female	PBMC	Multiplex	Healthy	29	2×250	Illumina HiSeq	FR1	CH1	IGHM, None, IGHG
SRR8283742	Female	PBMC	Multiplex	Healthy	29	2×250	Illumina HiSeq	FR1	CH1	IGHM, None, IGHG
SRR8283770	Male	PBMC	Multiplex	Healthy	29	2×250	Illumina HiSeq	FR1	CH1	IGHM, None, IGHG
SRR8283771	Male	PBMC	Multiplex	Healthy	29	2×250	Illumina HiSeq	FR1	CH1	IGHM, None, IGHG
SRR8283772	Male	PBMC	Multiplex	Healthy	29	2×250	Illumina HiSeq	FR1	CH1	IGHM, None, IGHG
SRR8283773	Male	PBMC	Multiplex	Healthy	18	2×250	Illumina HiSeq	FR1	CH1	IGHM, None, IGHG, IGHE
SRR8283774	Male	PBMC	Multiplex	Healthy	18	2×250	Illumina HiSeq	FR1	CH1	IGHM, None, IGHG, IGHE
SRR8283775	Male	PBMC	Multiplex	Healthy	18	2×250	Illumina HiSeq	FR1	CH1	IGHM, None, IGHG, IGHE
SRR8283776	Male	PBMC	Multiplex	Healthy	18	2×250	Illumina HiSeq	FR1	CH1	IGHM, None, IGHG, IGHE
SRR8283777	Male	PBMC	Multiplex	Healthy	18	2×250	Illumina HiSeq	FR1	CH1	IGHM, None, IGHG, IGHE
SRR8283778	Male	PBMC	Multiplex	Healthy	18	2×250	Illumina HiSeq	FR1	CH1	IGHM, None, IGHG, IGHE
SRR8283779	Male	PBMC	Multiplex	Healthy	18	2×250	Illumina HiSeq	FR1	CH1	IGHM, None, IGHG, IGHE
SRR8283780	Male	PBMC	Multiplex	Healthy	18	2×250	Illumina HiSeq	FR1	CH1	IGHM, None, IGHG, IGHE
SRR8283781	Male	PBMC	Multiplex	Healthy	18	2×250	Illumina HiSeq	FR1	CH1	IGHM, None, IGHG, IGHE
SRR8283782	Male	PBMC	Multiplex	Healthy	18	2×250	Illumina HiSeq	FR1	CH1	IGHM, None, IGHG, IGHE
SRR8283783	Male	PBMC	Multiplex	Healthy	18	2×250	Illumina HiSeq	FR1	CH1	IGHM, None, IGHG, IGHE
SRR8283784	Male	PBMC	Multiplex	Healthy	18	2×250	Illumina HiSeq	FR1	CH1	IGHM, None, IGHG, IGHE
SRR8283785	Male	PBMC	Multiplex	Healthy	18	2×250	Illumina HiSeq	FR1	CH1	IGHM, None, IGHG, IGHE
SRR8283786	Male	PBMC	Multiplex	Healthy	18	2×250	Illumina HiSeq	FR1	CH1	IGHM, None, IGHG, IGHE
SRR8283787	Male	PBMC	Multiplex	Healthy	18	2×250	Illumina HiSeq	FR1	CH1	IGHM, None, IGHG, IGHE
SRR8283788	Male	PBMC	Multiplex	Healthy	18	2×250	Illumina HiSeq	FR1	CH1	IGHM, None, IGHG, IGHE
SRR8283789	Male	PBMC	Multiplex	Healthy	18	2×250	Illumina HiSeq	FR1	CH1	IGHM, None, IGHG, IGHE
SRR8283791	Male	PBMC	Multiplex	Healthy	26	2×250	Illumina HiSeq	FR1	CH1	IGHM, None, IGHG, IGHE
SRR8283792	Male	PBMC	Multiplex	Healthy	26	2×250	Illumina HiSeq	FR1	CH1	IGHM, None, IGHG, IGHE
SRR8283793	Male	PBMC	Multiplex	Healthy	26	2×250	Illumina HiSeq	FR1	CH1	IGHM, None, IGHG
SRR8283794	Male	PBMC	Multiplex	Healthy	26	2×250	Illumina HiSeq	FR1	CH1	IGHM, None, IGHG, IGHE
SRR8283795	Male	PBMC	Multiplex	Healthy	26	2×250	Illumina HiSeq	FR1	CH1	IGHM, None, IGHG
SRR8283796	Male	PBMC	Multiplex	Healthy	26	2×250	Illumina HiSeq	FR1	CH1	IGHM, None, IGHG, IGHE
SRR8283797	Male	PBMC	Multiplex	Healthy	26	2×250	Illumina HiSeq	FR1	CH1	IGHM, None, IGHG, IGHE
SRR8283798	Male	PBMC	Multiplex	Healthy	26	2×250	Illumina HiSeq	FR1	CH1	IGHM, None, IGHG, IGHE
SRR8283799	Male	PBMC	Multiplex	Healthy	26	2×250	Illumina HiSeq	FR1	CH1	IGHM, None, IGHG
SRR8283800	Male	PBMC	Multiplex	Healthy	26	2×250	Illumina HiSeq	FR1	CH1	IGHM, None, IGHG, IGHE
SRR8283801	Male	PBMC	Multiplex	Healthy	26	2×250	Illumina HiSeq	FR1	CH1	IGHM, None, IGHG
SRR8283802	Male	PBMC	Multiplex	Healthy	26	2×250	Illumina HiSeq	FR1	CH1	IGHM, None, IGHG
SRR8283803	Male	PBMC	Multiplex	Healthy	26	2×250	Illumina HiSeq	FR1	CH1	IGHM, None, IGHG
SRR8283804	Male	PBMC	Multiplex	Healthy	26	2×250	Illumina HiSeq	FR1	CH1	IGHM, None, IGHG
SRR8283805	Male	PBMC	Multiplex	Healthy	26	2×250	Illumina HiSeq	FR1	CH1	IGHM, None, IGHG
SRR8283806	Male	PBMC	Multiplex	Healthy	26	2×250	Illumina HiSeq	FR1	CH1	IGHM, None, IGHG, IGHE
SRR8283807	Male	PBMC	Multiplex	Healthy	26	2×250	Illumina HiSeq	FR1	CH1	IGHM, None, IGHG, IGHE
SRR8283808	Male	PBMC	Multiplex	Healthy	26	2×250	Illumina HiSeq	FR1	CH1	IGHM, None, IGHG, IGHE
SRR8283839	Female	PBMC	Multiplex	Healthy	30	2×250	Illumina HiSeq	FR1	CH1	IGHM, None, IGHG
SRR8283840	Female	PBMC	Multiplex	Healthy	30	2×250	Illumina HiSeq	FR1	CH1	IGHM, None, IGHG
SRR8283841	Female	PBMC	Multiplex	Healthy	30	2×250	Illumina HiSeq	FR1	CH1	IGHM, None, IGHG
SRR8283842	Female	PBMC	Multiplex	Healthy	30	2×250	Illumina HiSeq	FR1	CH1	IGHM, None, IGHG
SRR6206369	Female	PBMC	Multiplex	HIV	Unknown	2×300	Illumina MiSeq	FR1	FR4	None, IGHD
SRR6206370	Female	PBMC	Multiplex	HIV	Unknown	2×300	Illumina MiSeq	FR1	FR4	None, IGHD
SRR6206371	Female	PBMC	Multiplex	Healthy	Unknown	2×300	Illumina MiSeq	FR1	FR4	None, IGHD
SRR6206372	Female	PBMC	Multiplex	HIV	Unknown	2×300	Illumina MiSeq	FR1	FR4	None, IGHD
SRR6206373	Female	PBMC	Multiplex	HIV	Unknown	2×300	Illumina MiSeq	FR1	FR4	None, IGHD
SRR6206374	Female	PBMC	Multiplex	Healthy	Unknown	2×300	Illumina MiSeq	FR1	FR4	None, IGHD
SRR6206375	Female	PBMC	Multiplex	HIV	Unknown	2×300	Illumina MiSeq	FR1	FR4	None, IGHD
SRR6206376	Female	PBMC	Multiplex	HIV	Unknown	2×300	Illumina MiSeq	FR1	FR4	None, IGHD
SRR6206377	Female	PBMC	Multiplex	Healthy	Unknown	2×300	Illumina MiSeq	FR1	FR4	None, IGHD
SRR6206378	Female	PBMC	Multiplex	Healthy	Unknown	2×300	Illumina MiSeq	FR1	FR4	None, IGHD
SRR6206379	Female	PBMC	Multiplex	HIV	Unknown	2×300	Illumina MiSeq	FR1	FR4	None, IGHD
SRR6206380	Female	PBMC	Multiplex	HIV	Unknown	2×300	Illumina MiSeq	FR1	FR4	None, IGHD
SRR6206381	Female	PBMC	Multiplex	HIV	Unknown	2×300	Illumina MiSeq	FR1	FR4	None, IGHD
SRR6206382	Female	PBMC	Multiplex	Healthy	Unknown	2×300	Illumina MiSeq	FR1	FR4	None, IGHD
SRR6206383	Female	PBMC	Multiplex	HIV	Unknown	2×300	Illumina MiSeq	FR1	FR4	None, IGHD
SRR6206384	Female	PBMC	Multiplex	HIV	Unknown	2×300	Illumina MiSeq	FR1	FR4	None, IGHD
SRR6206385	Female	PBMC	Multiplex	Healthy	Unknown	2×300	Illumina MiSeq	FR1	FR4	None, IGHD
SRR6206386	Female	PBMC	Multiplex	HIV	Unknown	2×300	Illumina MiSeq	FR1	FR4	None, IGHD
SRR6207002	Female	PBMC	Multiplex	Healthy	Unknown	2×300	Illumina MiSeq	FR1	FR4	None, IGHD
SRR6207003	Female	PBMC	Multiplex	Healthy	Unknown	2×300	Illumina MiSeq	FR1	FR4	None, IGHD
SRR6207004	Female	PBMC	Multiplex	HIV	Unknown	2×300	Illumina MiSeq	FR1	FR4	None, IGHD
SRR6207005	Female	PBMC	Multiplex	HIV	Unknown	2×300	Illumina MiSeq	FR1	FR4	None, IGHD
SRR6207006	Female	PBMC	Multiplex	HIV	Unknown	2×300	Illumina MiSeq	FR1	FR4	None, IGHD
SRR6207007	Female	PBMC	Multiplex	HIV	Unknown	2×300	Illumina MiSeq	FR1	FR4	None, IGHD
SRR6207008	Female	PBMC	Multiplex	HIV	Unknown	2×300	Illumina MiSeq	FR1	FR4	None, IGHD
SRR6207009	Female	PBMC	Multiplex	HIV	Unknown	2×300	Illumina MiSeq	FR1	FR4	None, IGHD
SRR6207010	Female	PBMC	Multiplex	HIV	Unknown	2×300	Illumina MiSeq	FR1	FR4	None, IGHD
SRR6207011	Female	PBMC	Multiplex	HIV	Unknown	2×300	Illumina MiSeq	FR1	FR4	None, IGHD
SRR6207012	Female	PBMC	Multiplex	HIV	Unknown	2×300	Illumina MiSeq	FR1	FR4	None, IGHD
SRR6207013	Female	PBMC	Multiplex	Healthy	Unknown	2×300	Illumina MiSeq	FR1	FR4	None, IGHD
SRR6207014	Female	PBMC	Multiplex	HIV	Unknown	2×300	Illumina MiSeq	FR1	FR4	None, IGHD
SRR6207015	Female	PBMC	Multiplex	Healthy	Unknown	2×300	Illumina MiSeq	FR1	FR4	None, IGHD
SRR6207016	Female	PBMC	Multiplex	HIV	Unknown	2×300	Illumina MiSeq	FR1	FR4	None, IGHD
SRR6207017	Female	PBMC	Multiplex	Healthy	Unknown	2×300	Illumina MiSeq	FR1	FR4	None, IGHD
SRR6207018	Female	PBMC	Multiplex	Healthy	Unknown	2×300	Illumina MiSeq	FR1	FR4	None, IGHD
SRR6207019	Female	PBMC	Multiplex	HIV	Unknown	2×300	Illumina MiSeq	FR1	FR4	None, IGHD
SRR6336498	Female	Other	Multiplex	EBOV	Unknown	2×250	Illumina MiSeq	FR1	CH1	None, IGHA, IGHG
SRR6336500	Female	Other	Multiplex	EBOV	Unknown	2×250	Illumina MiSeq	FR1	CH1	None
SRR6336501	Female	Other	Multiplex	EBOV	Unknown	2×250	Illumina MiSeq	FR1	CH1	None
SRR6386589	Female	Lymph node	Multiplex	Breast cancer	Unknown	2×300	Illumina MiSeq	FR1	CH1	IGHM, IGHA, None, IGHG
SRR6386596	Female	Lymph node	Multiplex	Breast cancer	Unknown	2×300	Illumina MiSeq	FR1	CH1	IGHM, None, IGHA, IGHG
SRR8365246	Female	PBMC	Multiplex	Healthy	47	2×250	Illumina HiSeq	FR1	CH1	None, IGHD
SRR8365247	Female	PBMC	Multiplex	Healthy	47	2×250	Illumina HiSeq	FR1	CH1	None, IGHD
SRR8365248	Female	PBMC	Multiplex	Healthy	47	2×250	Illumina HiSeq	FR1	CH1	None, IGHD
SRR8365249	Female	PBMC	Multiplex	Healthy	47	2×250	Illumina HiSeq	FR1	CH1	None, IGHD
SRR8365456	Female	PBMC	Multiplex	Healthy	47	2×250	Illumina HiSeq	FR1	CH1	None, IGHD
SRR8365457	Female	PBMC	Multiplex	Healthy	47	2×250	Illumina HiSeq	FR1	CH1	None, IGHD
SRR8365458	Female	PBMC	Multiplex	Healthy	47	2×250	Illumina HiSeq	FR1	CH1	None, IGHD, IGHE
SRR8365459	Female	PBMC	Multiplex	Healthy	47	2×250	Illumina HiSeq	FR1	CH1	None
SRR8365460	Female	PBMC	Multiplex	Healthy	47	2×250	Illumina HiSeq	FR1	CH1	None
SRR8365461	Female	PBMC	Multiplex	Healthy	47	2×250	Illumina HiSeq	FR1	CH1	None
SRR8365462	Female	PBMC	Multiplex	Healthy	47	2×250	Illumina HiSeq	FR1	CH1	None, IGHD
SRR8365463	Female	PBMC	Multiplex	Healthy	47	2×250	Illumina HiSeq	FR1	CH1	None, IGHD
SRR8365464	Female	PBMC	Multiplex	Healthy	47	2×250	Illumina HiSeq	FR1	CH1	None, IGHD, IGHE
SRR8365465	Female	PBMC	Multiplex	Healthy	47	2×250	Illumina HiSeq	FR1	CH1	None, IGHD, IGHE
SRR8365474	Female	PBMC	Multiplex	Healthy	47	2×250	Illumina HiSeq	FR1	CH1	None, IGHD
SRR8365485	Female	PBMC	Multiplex	Healthy	47	2×250	Illumina HiSeq	FR1	CH1	None, IGHD, IGHM, IGHG, IGHE
SRR8365487	Female	PBMC	Multiplex	Healthy	47	2×250	Illumina HiSeq	Leader	CH1	None
SRR8365488	Female	PBMC	Multiplex	Healthy	47	2×250	Illumina HiSeq	FR1	CH1	None, IGHD
SRR8365489	Female	PBMC	Multiplex	Healthy	47	2×250	Illumina HiSeq	FR1	CH1	None, IGHD
SRR8365490	Female	PBMC	Multiplex	Healthy	47	2×250	Illumina HiSeq	FR1	CH1	None, IGHD
SRR8365455	Male	PBMC	Multiplex	Healthy	22	2×250	Illumina HiSeq	Leader	CH1	IGHM, None, IGHE, IGHG
SRR8365250	Female	PBMC	Multiplex	Healthy	47	2×250	Illumina HiSeq	FR1	CH1	None, IGHD
SRR8365251	Female	PBMC	Multiplex	Healthy	47	2×250	Illumina HiSeq	FR1	CH1	None
SRR8365253	Female	PBMC	Multiplex	Healthy	47	2×250	Illumina HiSeq	FR1	CH1	None
SRR8365254	Female	PBMC	Multiplex	Healthy	47	2×250	Illumina MiSeq	Leader	CH1	None, IGHD
SRR8365255	Female	PBMC	Multiplex	Healthy	47	2×250	Illumina MiSeq	Leader	CH1	None, IGHD
SRR8365256	Female	PBMC	Multiplex	Healthy	47	2×250	Illumina MiSeq	Leader	CH1	None, IGHD
SRR8365257	Female	PBMC	Multiplex	Healthy	47	2×250	Illumina MiSeq	Leader	CH1	None, IGHD
SRR8365259	Male	PBMC	Multiplex	Healthy	22	2×250	Illumina HiSeq	FR1	CH1	None
SRR8365261	Male	PBMC	Multiplex	Healthy	22	2×250	Illumina HiSeq	FR1	CH1	None, IGHD
SRR8365263	Male	PBMC	Multiplex	Healthy	22	2×250	Illumina HiSeq	FR1	CH1	None, IGHD, IGHE, IGHG
SRR8365264	Female	PBMC	Multiplex	Healthy	47	2×250	Illumina HiSeq	FR1	CH1	None
SRR8365265	Female	PBMC	Multiplex	Healthy	47	2×250	Illumina HiSeq	FR1	CH1	None
SRR8365267	Female	PBMC	Multiplex	Healthy	47	2×250	Illumina HiSeq	FR1	CH1	None
SRR8365268	Female	PBMC	Multiplex	Healthy	47	2×250	Illumina HiSeq	FR1	CH1	None
SRR8365269	Female	PBMC	Multiplex	Healthy	47	2×250	Illumina HiSeq	FR1	CH1	None, IGHD, IGHE
SRR8365270	Female	PBMC	Multiplex	Healthy	47	2×250	Illumina HiSeq	FR1	CH1	None
SRR8365271	Female	PBMC	Multiplex	Healthy	47	2×250	Illumina HiSeq	FR1	CH1	None, IGHD, IGHE
SRR8365272	Female	PBMC	Multiplex	Healthy	47	2×250	Illumina HiSeq	FR1	CH1	None, IGHD, IGHE
SRR8365273	Female	PBMC	Multiplex	Healthy	47	2×250	Illumina HiSeq	FR1	CH1	None, IGHD
SRR8365274	Female	PBMC	Multiplex	Healthy	47	2×250	Illumina HiSeq	FR1	CH1	None, IGHD
SRR8365277	Female	PBMC	Multiplex	Healthy	47	2×250	Illumina HiSeq	Leader	CH1	None, IGHG
SRR8365278	Female	PBMC	Multiplex	Healthy	47	2×250	Illumina HiSeq	Leader	CH1	None
SRR8365279	Female	PBMC	Multiplex	Healthy	47	2×250	Illumina HiSeq	Leader	CH1	None
SRR8365281	Female	PBMC	Multiplex	Healthy	47	2×250	Illumina HiSeq	Leader	CH1	IGHM, None, IGHE
SRR8365282	Female	PBMC	Multiplex	Healthy	47	2×250	Illumina HiSeq	Leader	CH1	IGHA, None
SRR8365286	Male	PBMC	Multiplex	Healthy	22	2×250	Illumina HiSeq	Leader	CH1	IGHA, None
SRR8365287	Male	PBMC	Multiplex	Healthy	22	2×250	Illumina HiSeq	Leader	CH1	IGHM, None, IGHE, IGHG
SRR8365288	Male	PBMC	Multiplex	Healthy	22	2×250	Illumina HiSeq	Leader	CH1	None
SRR8365289	Male	PBMC	Multiplex	Healthy	22	2×250	Illumina HiSeq	Leader	CH1	None
SRR8365290	Male	PBMC	Multiplex	Healthy	22	2×250	Illumina HiSeq	Leader	CH1	None, IGHG
SRR8365291	Male	PBMC	Multiplex	Healthy	22	2×250	Illumina HiSeq	Leader	CH1	None, IGHG
SRR8365293	Male	PBMC	Multiplex	Healthy	29	2×250	Illumina HiSeq	Leader	CH1	None, IGHG
SRR8365296	Male	PBMC	Multiplex	Healthy	29	2×250	Illumina HiSeq	Leader	CH1	IGHA, None, IGHG
SRR8365297	Male	PBMC	Multiplex	Healthy	22	2×250	Illumina HiSeq	Leader	CH1	None
SRR8365298	Male	PBMC	Multiplex	Healthy	22	2×250	Illumina HiSeq	Leader	CH1	None, IGHG
SRR8365299	Male	PBMC	Multiplex	Healthy	29	2×250	Illumina HiSeq	Leader	CH1	None
SRR8365300	Male	PBMC	Multiplex	Healthy	29	2×250	Illumina HiSeq	Leader	CH1	None, IGHG
SRR8365301	Female	PBMC	Multiplex	Healthy	47	2×250	Illumina HiSeq	FR1	CH1	None, IGHD
SRR8365302	Female	PBMC	Multiplex	Healthy	47	2×250	Illumina HiSeq	FR1	CH1	None, IGHD
SRR8365303	Female	PBMC	Multiplex	Healthy	47	2×250	Illumina HiSeq	FR1	CH1	None, IGHD
SRR8365304	Female	PBMC	Multiplex	Healthy	47	2×250	Illumina HiSeq	FR1	CH1	None, IGHD
SRR8365305	Female	PBMC	Multiplex	Healthy	47	2×250	Illumina HiSeq	FR1	CH1	None, IGHD
SRR8365306	Female	PBMC	Multiplex	Healthy	47	2×250	Illumina HiSeq	FR1	CH1	None, IGHD
SRR8365307	Female	PBMC	Multiplex	Healthy	47	2×250	Illumina HiSeq	FR1	CH1	None, IGHD
SRR8365308	Female	PBMC	Multiplex	Healthy	47	2×250	Illumina HiSeq	FR1	CH1	None, IGHD
SRR8365309	Female	PBMC	Multiplex	Healthy	47	2×250	Illumina HiSeq	FR1	CH1	None, IGHD
SRR8365310	Female	PBMC	Multiplex	Healthy	47	2×250	Illumina HiSeq	FR1	CH1	None, IGHD
SRR8365311	Female	PBMC	Multiplex	Healthy	47	2×250	Illumina HiSeq	Leader	CH1	None, IGHG
SRR8365312	Female	PBMC	Multiplex	Healthy	47	2×250	Illumina HiSeq	Leader	CH1	None, IGHG
SRR8365315	Female	PBMC	Multiplex	Healthy	47	2×250	Illumina HiSeq	Leader	CH1	IGHA, None, IGHG
SRR8365316	Female	PBMC	Multiplex	Healthy	47	2×250	Illumina HiSeq	Leader	CH1	IGHM, None, IGHE, IGHG
SRR8365318	Female	PBMC	Multiplex	Healthy	47	2×250	Illumina HiSeq	Leader	CH1	None
SRR8365319	Female	PBMC	Multiplex	Healthy	47	2×250	Illumina HiSeq	Leader	CH1	None
SRR8365320	Female	PBMC	Multiplex	Healthy	47	2×250	Illumina HiSeq	Leader	CH1	None, IGHG
SRR8365321	Female	PBMC	Multiplex	Healthy	47	2×250	Illumina MiSeq	Leader	CH1	None, IGHD
SRR8365322	Female	PBMC	Multiplex	Healthy	47	2×250	Illumina MiSeq	Leader	CH1	None, IGHD
SRR8365323	Male	PBMC	Multiplex	Healthy	29	2×250	Illumina HiSeq	Leader	CH1	None
SRR8365326	Female	PBMC	Multiplex	Healthy	47	2×250	Illumina MiSeq	Leader	CH1	None, IGHD
SRR8365327	Female	PBMC	Multiplex	Healthy	47	2×250	Illumina MiSeq	Leader	CH1	None, IGHD
SRR8365328	Female	PBMC	Multiplex	Healthy	47	2×250	Illumina MiSeq	Leader	CH1	None, IGHD
SRR8365329	Female	PBMC	Multiplex	Healthy	47	2×250	Illumina MiSeq	Leader	CH1	None, IGHD
SRR8365330	Female	PBMC	Multiplex	Healthy	47	2×250	Illumina MiSeq	Leader	CH1	None, IGHD
SRR8365331	Female	PBMC	Multiplex	Healthy	47	2×250	Illumina MiSeq	Leader	CH1	None, IGHD
SRR8365332	Male	PBMC	Multiplex	Healthy	22	2×250	Illumina HiSeq	Leader	CH1	None, IGHG
SRR8365333	Male	PBMC	Multiplex	Healthy	22	2×250	Illumina HiSeq	Leader	CH1	None
SRR8365334	Male	PBMC	Multiplex	Healthy	22	2×250	Illumina HiSeq	Leader	CH1	None
SRR8365335	Male	PBMC	Multiplex	Healthy	22	2×250	Illumina HiSeq	Leader	CH1	IGHM, None, IGHE, IGHG
SRR8365336	Male	PBMC	Multiplex	Healthy	22	2×250	Illumina HiSeq	Leader	CH1	IGHA, None
SRR8365339	Male	PBMC	Multiplex	Healthy	22	2×250	Illumina HiSeq	Leader	CH1	None, IGHG
SRR8365341	Male	PBMC	Multiplex	Healthy	29	2×250	Illumina HiSeq	Leader	CH1	None, IGHG
SRR8365342	Male	PBMC	Multiplex	Healthy	22	2×250	Illumina HiSeq	Leader	CH1	None
SRR8365343	Male	PBMC	Multiplex	Healthy	22	2×250	Illumina HiSeq	Leader	CH1	IGHM, None, IGHE, IGHG
SRR8365344	Male	PBMC	Multiplex	Healthy	29	2×250	Illumina HiSeq	Leader	CH1	None
SRR8365345	Male	PBMC	Multiplex	Healthy	29	2×250	Illumina HiSeq	Leader	CH1	IGHM, None, IGHG, IGHE
SRR8365346	Male	PBMC	Multiplex	Healthy	29	2×250	Illumina HiSeq	Leader	CH1	IGHA, None, IGHG
SRR8365348	Female	PBMC	Multiplex	Healthy	47	2×250	Illumina HiSeq	FR1	CH1	None, IGHD
SRR8365350	Male	PBMC	Multiplex	Healthy	22	2×250	Illumina HiSeq	Leader	CH1	IGHA, None
SRR8365351	Male	PBMC	Multiplex	Healthy	22	2×250	Illumina HiSeq	Leader	CH1	None, IGHG
SRR8365353	Male	PBMC	Multiplex	Healthy	22	2×250	Illumina HiSeq	Leader	CH1	None
SRR8365354	Male	PBMC	Multiplex	Healthy	22	2×250	Illumina HiSeq	Leader	CH1	None, IGHG
SRR8365355	Male	PBMC	Multiplex	Healthy	22	2×250	Illumina HiSeq	Leader	CH1	IGHM, None, IGHE, IGHG
SRR8365356	Male	PBMC	Multiplex	Healthy	22	2×250	Illumina HiSeq	Leader	CH1	None
SRR8365358	Male	PBMC	Multiplex	Healthy	22	2×250	Illumina HiSeq	Leader	CH1	IGHA, None
SRR8365359	Male	PBMC	Multiplex	Healthy	29	2×250	Illumina HiSeq	Leader	CH1	None
SRR8365360	Male	PBMC	Multiplex	Healthy	29	2×250	Illumina HiSeq	Leader	CH1	None, IGHG
SRR8365361	Male	PBMC	Multiplex	Healthy	29	2×250	Illumina HiSeq	Leader	CH1	IGHM, None, IGHG, IGHE
SRR8365362	Male	PBMC	Multiplex	Healthy	29	2×250	Illumina HiSeq	Leader	CH1	None
SRR8365364	Male	PBMC	Multiplex	Healthy	29	2×250	Illumina HiSeq	Leader	CH1	IGHA, None, IGHG
SRR8365365	Male	PBMC	Multiplex	Healthy	29	2×250	Illumina HiSeq	Leader	CH1	None, IGHG
SRR8365367	Male	PBMC	Multiplex	Healthy	29	2×250	Illumina HiSeq	Leader	CH1	None, IGHG
SRR8365369	Male	PBMC	Multiplex	Healthy	29	2×250	Illumina HiSeq	Leader	CH1	None, IGHG
SRR8365371	Male	PBMC	Multiplex	Healthy	22	2×250	Illumina HiSeq	Leader	CH1	None, IGHG
SRR8365372	Male	PBMC	Multiplex	Healthy	29	2×250	Illumina HiSeq	Leader	CH1	None
SRR8365373	Male	PBMC	Multiplex	Healthy	22	2×250	Illumina HiSeq	Leader	CH1	None
SRR8365374	Male	PBMC	Multiplex	Healthy	22	2×250	Illumina HiSeq	Leader	CH1	IGHM, None, IGHE, IGHG
SRR8365375	Male	PBMC	Multiplex	Healthy	22	2×250	Illumina HiSeq	Leader	CH1	None, IGHG
SRR8365376	Male	PBMC	Multiplex	Healthy	22	2×250	Illumina HiSeq	Leader	CH1	None
SRR8365378	Male	PBMC	Multiplex	Healthy	22	2×250	Illumina HiSeq	Leader	CH1	None, IGHG
SRR8365379	Male	PBMC	Multiplex	Healthy	22	2×250	Illumina HiSeq	Leader	CH1	IGHA, None
SRR8365381	Male	PBMC	Multiplex	Healthy	29	2×250	Illumina HiSeq	Leader	CH1	None, IGHG
SRR8365382	Male	PBMC	Multiplex	Healthy	29	2×250	Illumina HiSeq	Leader	CH1	None
SRR8365384	Male	PBMC	Multiplex	Healthy	29	2×250	Illumina HiSeq	Leader	CH1	None, IGHG
SRR8365385	Male	PBMC	Multiplex	Healthy	29	2×250	Illumina HiSeq	Leader	CH1	IGHA, None, IGHG
SRR8365387	Male	PBMC	Multiplex	Healthy	29	2×250	Illumina HiSeq	Leader	CH1	None
SRR8365388	Male	PBMC	Multiplex	Healthy	29	2×250	Illumina HiSeq	Leader	CH1	IGHM, None, IGHG, IGHE
SRR8365389	Male	PBMC	Multiplex	Healthy	29	2×250	Illumina HiSeq	Leader	CH1	IGHA, None, IGHG
SRR8365393	Female	PBMC	Multiplex	Healthy	47	2×250	Illumina HiSeq	Leader	CH1	None
SRR8365395	Female	PBMC	Multiplex	Healthy	47	2×250	Illumina HiSeq	Leader	CH1	None, IGHG
SRR8365396	Female	PBMC	Multiplex	Healthy	47	2×250	Illumina HiSeq	Leader	CH1	None
SRR8365399	Female	PBMC	Multiplex	Healthy	47	2×250	Illumina HiSeq	Leader	CH1	IGHM, None, IGHE, IGHG
SRR8365400	Female	PBMC	Multiplex	Healthy	47	2×250	Illumina HiSeq	Leader	CH1	IGHA, None
SRR8365401	Male	PBMC	Multiplex	Healthy	29	2×250	Illumina HiSeq	Leader	CH1	None, IGHG
SRR8365402	Male	PBMC	Multiplex	Healthy	29	2×250	Illumina HiSeq	Leader	CH1	None
SRR8365403	Female	PBMC	Multiplex	Healthy	47	2×250	Illumina MiSeq	Leader	CH1	None, IGHD
SRR8365404	Female	PBMC	Multiplex	Healthy	47	2×250	Illumina MiSeq	Leader	CH1	None, IGHD
SRR8365405	Female	PBMC	Multiplex	Healthy	47	2×250	Illumina MiSeq	Leader	CH1	None, IGHD
SRR8365406	Female	PBMC	Multiplex	Healthy	47	2×250	Illumina MiSeq	Leader	CH1	None, IGHD
SRR8365407	Female	PBMC	Multiplex	Healthy	47	2×250	Illumina MiSeq	Leader	CH1	None, IGHD
SRR8365408	Female	PBMC	Multiplex	Healthy	47	2×250	Illumina MiSeq	Leader	CH1	None, IGHD
SRR8365409	Female	PBMC	Multiplex	Healthy	47	2×250	Illumina MiSeq	Leader	CH1	None, IGHD
SRR8365410	Female	PBMC	Multiplex	Healthy	47	2×250	Illumina MiSeq	Leader	CH1	None, IGHD
SRR8365411	Female	PBMC	Multiplex	Healthy	47	2×250	Illumina MiSeq	Leader	CH1	None, IGHD
SRR8365412	Female	PBMC	Multiplex	Healthy	47	2×250	Illumina MiSeq	Leader	CH1	None, IGHD
SRR8365413	Male	PBMC	Multiplex	Healthy	29	2×250	Illumina HiSeq	Leader	CH1	IGHM, None, IGHG, IGHE
SRR8365414	Male	PBMC	Multiplex	Healthy	29	2×250	Illumina HiSeq	Leader	CH1	None
SRR8365415	Male	PBMC	Multiplex	Healthy	29	2×250	Illumina HiSeq	Leader	CH1	None
SRR8365416	Male	PBMC	Multiplex	Healthy	29	2×250	Illumina HiSeq	Leader	CH1	None, IGHG
SRR8365417	Male	PBMC	Multiplex	Healthy	29	2×250	Illumina HiSeq	Leader	CH1	None, IGHG
SRR8365418	Male	PBMC	Multiplex	Healthy	29	2×250	Illumina HiSeq	FR1	CH1	None, IGHD, IGHG, IGHE
SRR8365419	Male	PBMC	Multiplex	Healthy	29	2×250	Illumina HiSeq	FR1	CH1	None, IGHD
SRR8365420	Male	PBMC	Multiplex	Healthy	29	2×250	Illumina HiSeq	FR1	CH1	None, IGHD, IGHG, IGHM
SRR8365421	Male	PBMC	Multiplex	Healthy	29	2×250	Illumina HiSeq	FR1	CH1	None, IGHD
SRR8365422	Male	PBMC	Multiplex	Healthy	29	2×250	Illumina HiSeq	FR1	CH1	None, IGHD
SRR8365423	Male	PBMC	Multiplex	Healthy	29	2×250	Illumina HiSeq	FR1	CH1	None, IGHD
SRR8365424	Male	PBMC	Multiplex	Healthy	29	2×250	Illumina HiSeq	FR1	CH1	None, IGHD, IGHG, IGHE
SRR8365427	Male	PBMC	Multiplex	Healthy	29	2×250	Illumina HiSeq	Leader	CH1	IGHA, None, IGHG
SRR8365428	Female	PBMC	Multiplex	Healthy	47	2×250	Illumina HiSeq	Leader	CH1	None
SRR8365429	Female	PBMC	Multiplex	Healthy	47	2×250	Illumina HiSeq	Leader	CH1	None, IGHG
SRR8365431	Female	PBMC	Multiplex	Healthy	47	2×250	Illumina HiSeq	Leader	CH1	None
SRR8365432	Female	PBMC	Multiplex	Healthy	47	2×250	Illumina HiSeq	Leader	CH1	IGHA, None
SRR8365433	Female	PBMC	Multiplex	Healthy	47	2×250	Illumina HiSeq	Leader	CH1	IGHM, None, IGHE
SRR8365434	Female	PBMC	Multiplex	Healthy	47	2×250	Illumina MiSeq	Leader	CH1	None, IGHD
SRR8365435	Female	PBMC	Multiplex	Healthy	47	2×250	Illumina MiSeq	Leader	CH1	None, IGHD
SRR8365436	Female	PBMC	Multiplex	Healthy	47	2×250	Illumina MiSeq	Leader	CH1	None, IGHD
SRR8365437	Female	PBMC	Multiplex	Healthy	47	2×250	Illumina MiSeq	Leader	CH1	None, IGHD
SRR8365438	Female	PBMC	Multiplex	Healthy	47	2×250	Illumina MiSeq	Leader	CH1	None, IGHD
SRR8365439	Female	PBMC	Multiplex	Healthy	47	2×250	Illumina MiSeq	Leader	CH1	None, IGHD
SRR8365440	Female	PBMC	Multiplex	Healthy	47	2×250	Illumina MiSeq	Leader	CH1	None, IGHD
SRR8365441	Female	PBMC	Multiplex	Healthy	47	2×250	Illumina MiSeq	Leader	CH1	None, IGHD
SRR8365442	Male	PBMC	Multiplex	Healthy	29	2×250	Illumina HiSeq	Leader	CH1	IGHM, None, IGHG, IGHE
SRR8365443	Female	PBMC	Multiplex	Healthy	47	2×250	Illumina MiSeq	Leader	CH1	None, IGHD
SRR8365444	Female	PBMC	Multiplex	Healthy	47	2×250	Illumina MiSeq	Leader	CH1	None, IGHD
SRR8365445	Male	PBMC	Multiplex	Healthy	29	2×250	Illumina HiSeq	Leader	CH1	None
SRR8365446	Male	PBMC	Multiplex	Healthy	29	2×250	Illumina HiSeq	FR1	CH1	None, IGHD
SRR8365447	Male	PBMC	Multiplex	Healthy	29	2×250	Illumina HiSeq	FR1	CH1	None, IGHD, IGHE, IGHG
SRR8365448	Male	PBMC	Multiplex	Healthy	29	2×250	Illumina HiSeq	FR1	CH1	None, IGHD
SRR8365449	Male	PBMC	Multiplex	Healthy	29	2×250	Illumina HiSeq	FR1	CH1	None, IGHD, IGHG
SRR8365450	Male	PBMC	Multiplex	Healthy	29	2×250	Illumina HiSeq	FR1	CH1	None, IGHD
SRR8365451	Male	PBMC	Multiplex	Healthy	22	2×250	Illumina HiSeq	Leader	CH1	None, IGHG
SRR8365452	Male	PBMC	Multiplex	Healthy	22	2×250	Illumina HiSeq	Leader	CH1	None, IGHG
SRR8365453	Male	PBMC	Multiplex	Healthy	22	2×250	Illumina HiSeq	Leader	CH1	None
SRR8365454	Male	PBMC	Multiplex	Healthy	22	2×250	Illumina HiSeq	Leader	CH1	None
SRR8365466	Male	PBMC	Multiplex	Healthy	29	2×250	Illumina HiSeq	Leader	CH1	IGHM, None, IGHG, IGHE
SRR8365467	Male	PBMC	Multiplex	Healthy	22	2×250	Illumina HiSeq	FR1	CH1	None, IGHD, IGHG, IGHM
SRR8365471	Male	PBMC	Multiplex	Healthy	22	2×250	Illumina HiSeq	FR1	CH1	None, IGHD
SRR8365473	Male	PBMC	Multiplex	Healthy	22	2×250	Illumina HiSeq	FR1	CH1	None, IGHD
SRR8365477	Male	PBMC	Multiplex	Healthy	22	2×250	Illumina HiSeq	Leader	CH1	IGHA, None
SRR8365480	Female	PBMC	Multiplex	Healthy	47	2×250	Illumina HiSeq	Leader	CH1	IGHA, None, IGHG
SRR8365481	Female	PBMC	Multiplex	Healthy	47	2×250	Illumina HiSeq	Leader	CH1	IGHM, None, IGHE, IGHG
SRR8365482	Female	PBMC	Multiplex	Healthy	47	2×250	Illumina HiSeq	FR1	CH1	None, IGHD
SRR8365483	Female	PBMC	Multiplex	Healthy	47	2×250	Illumina HiSeq	FR1	CH1	None, IGHD, IGHM, IGHE, IGHG
SRR8489722	Female	Cord blood	Multiplex	Healthy	Unknown	2×250	Illumina MiSeq	FR1	CH1	None
SRR8489723	Female	Cord blood	Multiplex	Healthy	Unknown	2×250	Illumina MiSeq	FR1	CH1	None
SRR8489724	Male	Cord blood	Multiplex	Healthy	Unknown	2×250	Illumina MiSeq	FR1	CH1	None
SRR10102038	Male	PBMC	RACE	Car accident	48	2×300	Illumina MiSeq	Unavailable	CH1	IGHG
SRR10102039	Male	PBMC	RACE	Car accident	48	2×300	Illumina MiSeq	Unavailable	CH1	IGHG
SRR10102157	Unknown	PBMC	RACE	Influenza	Unknown	2×300	Illumina MiSeq	Unavailable	CH1	IGHG
SRR10102168	Male	PBMC	RACE	Influenza	Unknown	2×300	Illumina MiSeq	Unavailable	CH1	IGHG
SRR10102179	Male	PBMC	RACE	Influenza	79	2×300	Illumina MiSeq	Unavailable	CH1	IGHG
SRR10102190	Male	PBMC	RACE	Influenza	68	2×300	Illumina MiSeq	Unavailable	CH1	IGHG
SRR10102201	Male	PBMC	RACE	Influenza	68	2×300	Illumina MiSeq	Unavailable	CH1	IGHG
SRR10102212	Male	PBMC	RACE	Influenza	Unknown	2×300	Illumina MiSeq	Unavailable	CH1	IGHG
SRR10101960	Female	PBMC	RACE	Healthy	26	2×300	Illumina MiSeq	Unavailable	CH1	IGHG
SRR10101961	Male	PBMC	RACE	Healthy	23	2×300	Illumina MiSeq	Unavailable	CH1	IGHG
SRR10101962	Male	PBMC	RACE	Healthy	24	2×300	Illumina MiSeq	Unavailable	CH1	IGHG
SRR10101963	Male	PBMC	RACE	Healthy	23	2×300	Illumina MiSeq	Unavailable	CH1	IGHG
SRR10101964	Male	PBMC	RACE	Healthy	25	2×300	Illumina MiSeq	Unavailable	CH1	IGHG
SRR10101965	Female	PBMC	RACE	Healthy	22	2×300	Illumina MiSeq	Unavailable	CH1	IGHG
SRR10101966	Male	PBMC	RACE	Healthy	23	2×300	Illumina MiSeq	Unavailable	CH1	IGHG
SRR10101968	Female	PBMC	RACE	Healthy	39	2×300	Illumina MiSeq	Unavailable	CH1	IGHG
SRR10101969	Male	PBMC	RACE	Influenza	79	2×300	Illumina MiSeq	Unavailable	CH1	IGHG
SRR10101970	Female	PBMC	RACE	Healthy	42	2×300	Illumina MiSeq	Unavailable	CH1	IGHG
SRR10101971	Female	PBMC	RACE	Healthy	39	2×300	Illumina MiSeq	Unavailable	CH1	IGHG
SRR10101972	Female	PBMC	RACE	Healthy	35	2×300	Illumina MiSeq	Unavailable	CH1	IGHG
SRR10101973	Female	PBMC	RACE	Healthy	47	2×300	Illumina MiSeq	Unavailable	CH1	IGHG
SRR10101975	Female	PBMC	RACE	Healthy	46	2×300	Illumina MiSeq	Unavailable	CH1	IGHG
SRR10101977	Female	PBMC	RACE	Healthy	49	2×300	Illumina MiSeq	Unavailable	CH1	IGHG
SRR10101979	Female	PBMC	RACE	Healthy	36	2×300	Illumina MiSeq	Unavailable	CH1	IGHG
SRR10101980	Male	PBMC	RACE	Influenza	68	2×300	Illumina MiSeq	Unavailable	CH1	IGHG
SRR10101981	Female	PBMC	RACE	Healthy	33	2×300	Illumina MiSeq	Unavailable	CH1	IGHG
SRR10101982	Female	PBMC	RACE	Healthy	34	2×300	Illumina MiSeq	Unavailable	CH1	IGHG
SRR10101984	Female	PBMC	RACE	Healthy	37	2×300	Illumina MiSeq	Unavailable	CH1	IGHG
SRR10101985	Female	PBMC	RACE	Healthy	33	2×300	Illumina MiSeq	Unavailable	CH1	IGHG
SRR10101986	Female	PBMC	RACE	Healthy	37	2×300	Illumina MiSeq	Unavailable	CH1	IGHG
SRR10101987	Female	PBMC	RACE	Healthy	34	2×300	Illumina MiSeq	Unavailable	CH1	IGHG
SRR10101988	Female	PBMC	RACE	Healthy	34	2×300	Illumina MiSeq	Unavailable	CH1	IGHG
SRR10101989	Female	PBMC	RACE	Healthy	37	2×300	Illumina MiSeq	Unavailable	CH1	IGHG
SRR10101990	Female	PBMC	RACE	Healthy	37	2×300	Illumina MiSeq	Unavailable	CH1	IGHG
SRR10101992	Male	PBMC	RACE	Healthy	23	2×300	Illumina MiSeq	Unavailable	CH1	IGHG
SRR10101993	Male	PBMC	RACE	HBV	21	2×300	Illumina MiSeq	Unavailable	CH1	IGHG
SRR10101994	Female	PBMC	RACE	Healthy	24	2×300	Illumina MiSeq	Unavailable	CH1	IGHG
SRR10101995	Female	PBMC	RACE	Healthy	23	2×300	Illumina MiSeq	Unavailable	CH1	IGHG
SRR10101996	Female	PBMC	RACE	Healthy	28	2×300	Illumina MiSeq	Unavailable	CH1	IGHG
SRR10101997	Female	PBMC	RACE	Healthy	27	2×300	Illumina MiSeq	Unavailable	CH1	IGHG
SRR10101998	Female	PBMC	RACE	Healthy	43	2×300	Illumina MiSeq	Unavailable	CH1	IGHG
SRR10101999	Female	PBMC	RACE	Healthy	37	2×300	Illumina MiSeq	Unavailable	CH1	IGHG
SRR10102000	Male	PBMC	RACE	Healthy	25	2×300	Illumina MiSeq	Unavailable	CH1	IGHG
SRR10102001	Male	PBMC	RACE	Healthy	30	2×300	Illumina MiSeq	Unavailable	CH1	IGHG
SRR10102002	Male	PBMC	RACE	Healthy	41	2×300	Illumina MiSeq	Unavailable	CH1	IGHG
SRR10102003	Female	PBMC	RACE	Healthy	73	2×300	Illumina MiSeq	Unavailable	CH1	IGHG
SRR10102004	Male	PBMC	RACE	Liver cirrhosis	49	2×300	Illumina MiSeq	Unavailable	CH1	IGHG
SRR10102005	Male	PBMC	RACE	Healthy	43	2×300	Illumina MiSeq	Unavailable	CH1	IGHG
SRR10102006	Male	PBMC	RACE	Healthy	29	2×300	Illumina MiSeq	Unavailable	CH1	IGHG
SRR10102007	Male	PBMC	RACE	Healthy	59	2×300	Illumina MiSeq	Unavailable	CH1	IGHG
SRR10102008	Male	PBMC	RACE	Healthy	73	2×300	Illumina MiSeq	Unavailable	CH1	IGHG
SRR10102009	Female	PBMC	RACE	Healthy	73	2×300	Illumina MiSeq	Unavailable	CH1	IGHG
SRR10102010	Female	PBMC	RACE	Healthy	32	2×300	Illumina MiSeq	Unavailable	CH1	IGHG
SRR10102011	Male	PBMC	RACE	Healthy	54	2×300	Illumina MiSeq	Unavailable	CH1	IGHG
SRR10102012	Female	PBMC	RACE	Healthy	37	2×300	Illumina MiSeq	Unavailable	CH1	IGHG
SRR10102013	Male	PBMC	RACE	Healthy	30	2×300	Illumina MiSeq	Unavailable	CH1	IGHG
SRR10102014	Female	PBMC	RACE	Healthy	53	2×300	Illumina MiSeq	Unavailable	CH1	IGHG
SRR10102015	Male	PBMC	RACE	HBV	38	2×300	Illumina MiSeq	Unavailable	CH1	IGHG
SRR10102016	Female	PBMC	RACE	Healthy	34	2×300	Illumina MiSeq	Unavailable	CH1	IGHG
SRR10102017	Female	PBMC	RACE	Healthy	50	2×300	Illumina MiSeq	Unavailable	CH1	IGHG
SRR10102018	Female	PBMC	RACE	Healthy	49	2×300	Illumina MiSeq	Unavailable	CH1	IGHG
SRR10102019	Female	PBMC	RACE	Healthy	31	2×300	Illumina MiSeq	Unavailable	CH1	IGHG
SRR10102020	Female	PBMC	RACE	Healthy	50	2×300	Illumina MiSeq	Unavailable	CH1	IGHG
SRR10102021	Female	PBMC	RACE	Healthy	49	2×300	Illumina MiSeq	Unavailable	CH1	IGHG
SRR10102023	Female	PBMC	RACE	Healthy	46	2×300	Illumina MiSeq	Unavailable	CH1	IGHG
SRR10102024	Female	PBMC	RACE	Healthy	44	2×300	Illumina MiSeq	Unavailable	CH1	IGHG
SRR10102025	Female	PBMC	RACE	Healthy	33	2×300	Illumina MiSeq	Unavailable	CH1	IGHG
SRR10102027	Female	PBMC	RACE	Healthy	36	2×300	Illumina MiSeq	Unavailable	CH1	IGHG
SRR10102028	Female	PBMC	RACE	Healthy	35	2×300	Illumina MiSeq	Unavailable	CH1	IGHG
SRR10102029	Unknown	PBMC	RACE	Healthy	Unknown	2×300	Illumina MiSeq	Unavailable	CH1	IGHG
SRR10102030	Female	PBMC	RACE	Healthy	40	2×300	Illumina MiSeq	Unavailable	CH1	IGHG
SRR10102031	Female	PBMC	RACE	Healthy	42	2×300	Illumina MiSeq	Unavailable	CH1	IGHG
SRR10102032	Female	PBMC	RACE	Healthy	38	2×300	Illumina MiSeq	Unavailable	CH1	IGHG
SRR10102033	Male	PBMC	RACE	HBV	63	2×300	Illumina MiSeq	Unavailable	CH1	IGHG
SRR10102034	Male	PBMC	RACE	Liver cirrhosis	45	2×300	Illumina MiSeq	Unavailable	CH1	IGHG
SRR10102035	Male	PBMC	RACE	Liver cirrhosis	30	2×300	Illumina MiSeq	Unavailable	CH1	IGHG
SRR10102036	Male	PBMC	RACE	Liver cirrhosis	56	2×300	Illumina MiSeq	Unavailable	CH1	IGHG
SRR10102037	Male	PBMC	RACE	Influenza	79	2×300	Illumina MiSeq	Unavailable	CH1	IGHG
SRR10102040	Female	PBMC	RACE	Healthy	46	2×300	Illumina MiSeq	Unavailable	CH1	IGHG
SRR10102041	Female	PBMC	RACE	Healthy	31	2×300	Illumina MiSeq	Unavailable	CH1	IGHG
SRR10102042	Female	PBMC	RACE	Healthy	45	2×300	Illumina MiSeq	Unavailable	CH1	IGHG
SRR10102043	Female	PBMC	RACE	Healthy	47	2×300	Illumina MiSeq	Unavailable	CH1	IGHG
SRR10102045	Female	PBMC	RACE	Healthy	48	2×300	Illumina MiSeq	Unavailable	CH1	IGHG
SRR10102047	Male	PBMC	RACE	Healthy	33	2×300	Illumina MiSeq	Unavailable	CH1	IGHG
SRR10102048	Male	PBMC	RACE	Healthy	51	2×300	Illumina MiSeq	Unavailable	CH1	IGHG
SRR10102049	Male	PBMC	RACE	Healthy	29	2×300	Illumina MiSeq	Unavailable	CH1	IGHG
SRR10102050	Female	PBMC	RACE	Healthy	27	2×300	Illumina MiSeq	Unavailable	CH1	IGHG
SRR10102051	Female	PBMC	RACE	Healthy	42	2×300	Illumina MiSeq	Unavailable	CH1	IGHG
SRR10102052	Male	PBMC	RACE	Healthy	38	2×300	Illumina MiSeq	Unavailable	CH1	IGHG
SRR10102053	Male	PBMC	RACE	Healthy	53	2×300	Illumina MiSeq	Unavailable	CH1	IGHG
SRR10102054	Unknown	PBMC	RACE	Healthy	Unknown	2×300	Illumina MiSeq	Unavailable	CH1	IGHG
SRR10102055	Female	PBMC	RACE	Healthy	29	2×300	Illumina MiSeq	Unavailable	CH1	IGHG
SRR10102056	Female	PBMC	RACE	Healthy	77	2×300	Illumina MiSeq	Unavailable	CH1	IGHG
SRR10102057	Male	PBMC	RACE	Hepatocellular carcinoma	52	2×300	Illumina MiSeq	Unavailable	CH1	IGHG
SRR10102058	Male	PBMC	RACE	Healthy	65	2×300	Illumina MiSeq	Unavailable	CH1	IGHG
SRR10102059	Male	PBMC	RACE	Healthy	36	2×300	Illumina MiSeq	Unavailable	CH1	IGHG
SRR10102060	Male	PBMC	RACE	Healthy	81	2×300	Illumina MiSeq	Unavailable	CH1	IGHG
SRR10102061	Female	PBMC	RACE	Healthy	74	2×300	Illumina MiSeq	Unavailable	CH1	IGHG
SRR10102062	Female	PBMC	RACE	Healthy	73	2×300	Illumina MiSeq	Unavailable	CH1	IGHG
SRR10102063	Male	PBMC	RACE	Healthy	32	2×300	Illumina MiSeq	Unavailable	CH1	IGHG
SRR10102064	Male	PBMC	RACE	Healthy	73	2×300	Illumina MiSeq	Unavailable	CH1	IGHG
SRR10102065	Male	PBMC	RACE	Healthy	41	2×300	Illumina MiSeq	Unavailable	CH1	IGHG
SRR10102066	Male	PBMC	RACE	Healthy	73	2×300	Illumina MiSeq	Unavailable	CH1	IGHG
SRR10102067	Male	PBMC	RACE	Healthy	36	2×300	Illumina MiSeq	Unavailable	CH1	IGHG
SRR10102068	Male	PBMC	RACE	Hepatocellular carcinoma	65	2×300	Illumina MiSeq	Unavailable	CH1	IGHG
SRR10102069	Male	PBMC	RACE	Healthy	41	2×300	Illumina MiSeq	Unavailable	CH1	IGHG
SRR10102070	Female	PBMC	RACE	Healthy	52	2×300	Illumina MiSeq	Unavailable	CH1	IGHG
SRR10102071	Male	PBMC	RACE	Healthy	30	2×300	Illumina MiSeq	Unavailable	CH1	IGHG
SRR10102072	Male	PBMC	RACE	Healthy	71	2×300	Illumina MiSeq	Unavailable	CH1	IGHG
SRR10102073	Male	PBMC	RACE	Healthy	52	2×300	Illumina MiSeq	Unavailable	CH1	IGHG
SRR10102074	Female	PBMC	RACE	Healthy	34	2×300	Illumina MiSeq	Unavailable	CH1	IGHG
SRR10102075	Male	PBMC	RACE	Healthy	34	2×300	Illumina MiSeq	Unavailable	CH1	IGHG
SRR10102076	Male	PBMC	RACE	Healthy	69	2×300	Illumina MiSeq	Unavailable	CH1	IGHG
SRR10102077	Male	PBMC	RACE	Healthy	30	2×300	Illumina MiSeq	Unavailable	CH1	IGHG
SRR10102078	Male	PBMC	RACE	Healthy	41	2×300	Illumina MiSeq	Unavailable	CH1	IGHG
SRR10102079	Female	PBMC	RACE	Hepatocellular carcinoma	63	2×300	Illumina MiSeq	Unavailable	CH1	IGHG
SRR10102080	Female	PBMC	RACE	Healthy	82	2×300	Illumina MiSeq	Unavailable	CH1	IGHG
SRR10102081	Female	PBMC	RACE	Healthy	73	2×300	Illumina MiSeq	Unavailable	CH1	IGHG
SRR10102082	Male	PBMC	RACE	Healthy	43	2×300	Illumina MiSeq	Unavailable	CH1	IGHG
SRR10102083	Male	PBMC	RACE	Healthy	29	2×300	Illumina MiSeq	Unavailable	CH1	IGHG
SRR10102084	Male	PBMC	RACE	Healthy	59	2×300	Illumina MiSeq	Unavailable	CH1	IGHG
SRR10102085	Female	PBMC	RACE	Healthy	73	2×300	Illumina MiSeq	Unavailable	CH1	IGHG
SRR10102086	Female	PBMC	RACE	Healthy	32	2×300	Illumina MiSeq	Unavailable	CH1	IGHG
SRR10102087	Male	PBMC	RACE	Healthy	54	2×300	Illumina MiSeq	Unavailable	CH1	IGHG
SRR10102088	Female	PBMC	RACE	Healthy	53	2×300	Illumina MiSeq	Unavailable	CH1	IGHG
SRR10102089	Male	PBMC	RACE	Healthy	33	2×300	Illumina MiSeq	Unavailable	CH1	IGHG
SRR10102090	Male	PBMC	RACE	Liver cirrhosis	56	2×300	Illumina MiSeq	Unavailable	CH1	IGHG
SRR10102091	Male	PBMC	RACE	Healthy	51	2×300	Illumina MiSeq	Unavailable	CH1	IGHG
SRR10102092	Male	PBMC	RACE	Healthy	29	2×300	Illumina MiSeq	Unavailable	CH1	IGHG
SRR10102093	Female	PBMC	RACE	Healthy	42	2×300	Illumina MiSeq	Unavailable	CH1	IGHG
SRR10102094	Male	PBMC	RACE	Healthy	38	2×300	Illumina MiSeq	Unavailable	CH1	IGHG
SRR10102095	Male	PBMC	RACE	Healthy	53	2×300	Illumina MiSeq	Unavailable	CH1	IGHG
SRR10102096	Male	PBMC	RACE	Healthy	50	2×300	Illumina MiSeq	Unavailable	CH1	IGHG
SRR10102097	Male	PBMC	RACE	Healthy	30	2×300	Illumina MiSeq	Unavailable	CH1	IGHG
SRR10102098	Male	PBMC	RACE	Healthy	66	2×300	Illumina MiSeq	Unavailable	CH1	IGHG
SRR10102099	Male	PBMC	RACE	Healthy	28	2×300	Illumina MiSeq	Unavailable	CH1	IGHG
SRR10102100	Male	PBMC	RACE	Healthy	34	2×300	Illumina MiSeq	Unavailable	CH1	IGHG
SRR10102101	Male	PBMC	RACE	HBV	29	2×300	Illumina MiSeq	Unavailable	CH1	IGHG
SRR10102102	Male	PBMC	RACE	Influenza	68	2×300	Illumina MiSeq	Unavailable	CH1	IGHG
SRR10102103	Male	PBMC	RACE	Healthy	49	2×300	Illumina MiSeq	Unavailable	CH1	IGHG
SRR10102104	Female	PBMC	RACE	Healthy	74	2×300	Illumina MiSeq	Unavailable	CH1	IGHG
SRR10102105	Male	PBMC	RACE	Healthy	73	2×300	Illumina MiSeq	Unavailable	CH1	IGHG
SRR10102106	Male	PBMC	RACE	Healthy	73	2×300	Illumina MiSeq	Unavailable	CH1	IGHG
SRR10102107	Male	PBMC	RACE	Healthy	73	2×300	Illumina MiSeq	Unavailable	CH1	IGHG
SRR10102108	Female	PBMC	RACE	Healthy	69	2×300	Illumina MiSeq	Unavailable	CH1	IGHG
SRR10102109	Male	PBMC	RACE	Healthy	48	2×300	Illumina MiSeq	Unavailable	CH1	IGHG
SRR10102110	Female	PBMC	RACE	Healthy	73	2×300	Illumina MiSeq	Unavailable	CH1	IGHG
SRR10102111	Female	PBMC	RACE	Healthy	47	2×300	Illumina MiSeq	Unavailable	CH1	IGHG
SRR10102112	Female	PBMC	RACE	Healthy	73	2×300	Illumina MiSeq	Unavailable	CH1	IGHG
SRR10102113	Male	PBMC	RACE	Hepatocellular carcinoma	65	2×300	Illumina MiSeq	Unavailable	CH1	IGHG
SRR10102114	Male	PBMC	RACE	Healthy	73	2×300	Illumina MiSeq	Unavailable	CH1	IGHG
SRR10102115	Female	PBMC	RACE	Healthy	45	2×300	Illumina MiSeq	Unavailable	CH1	IGHG
SRR10102116	Female	PBMC	RACE	Healthy	66	2×300	Illumina MiSeq	Unavailable	CH1	IGHG
SRR10102117	Female	PBMC	RACE	Healthy	32	2×300	Illumina MiSeq	Unavailable	CH1	IGHG
SRR10102118	Male	PBMC	RACE	Healthy	32	2×300	Illumina MiSeq	Unavailable	CH1	IGHG
SRR10102119	Female	PBMC	RACE	Healthy	36	2×300	Illumina MiSeq	Unavailable	CH1	IGHG
SRR10102120	Male	PBMC	RACE	Healthy	30	2×300	Illumina MiSeq	Unavailable	CH1	IGHG
SRR10102121	Female	PBMC	RACE	Healthy	67	2×300	Illumina MiSeq	Unavailable	CH1	IGHG
SRR10102122	Female	PBMC	RACE	Healthy	34	2×300	Illumina MiSeq	Unavailable	CH1	IGHG
SRR10102123	Female	PBMC	RACE	Healthy	27	2×300	Illumina MiSeq	Unavailable	CH1	IGHG
SRR10102124	Male	PBMC	RACE	Liver cirrhosis	70	2×300	Illumina MiSeq	Unavailable	CH1	IGHG
SRR10102125	Male	PBMC	RACE	Healthy	38	2×300	Illumina MiSeq	Unavailable	CH1	IGHG
SRR10102126	Female	PBMC	RACE	Healthy	42	2×300	Illumina MiSeq	Unavailable	CH1	IGHG
SRR10102127	Male	PBMC	RACE	Healthy	42	2×300	Illumina MiSeq	Unavailable	CH1	IGHG
SRR10102128	Male	PBMC	RACE	Healthy	57	2×300	Illumina MiSeq	Unavailable	CH1	IGHG
SRR10102129	Male	PBMC	RACE	Healthy	44	2×300	Illumina MiSeq	Unavailable	CH1	IGHG
SRR10102130	Male	PBMC	RACE	Healthy	65	2×300	Illumina MiSeq	Unavailable	CH1	IGHG
SRR10102131	Male	PBMC	RACE	Healthy	47	2×300	Illumina MiSeq	Unavailable	CH1	IGHG
SRR10102132	Male	PBMC	RACE	Healthy	53	2×300	Illumina MiSeq	Unavailable	CH1	IGHG
SRR10102133	Female	PBMC	RACE	Healthy	51	2×300	Illumina MiSeq	Unavailable	CH1	IGHG
SRR10102134	Female	PBMC	RACE	Healthy	61	2×300	Illumina MiSeq	Unavailable	CH1	IGHG
SRR10102135	Male	PBMC	RACE	HBV	21	2×300	Illumina MiSeq	Unavailable	CH1	IGHG
SRR10102136	Female	PBMC	RACE	Healthy	74	2×300	Illumina MiSeq	Unavailable	CH1	IGHG
SRR10102137	Male	PBMC	RACE	Healthy	65	2×300	Illumina MiSeq	Unavailable	CH1	IGHG
SRR10102138	Male	PBMC	RACE	Healthy	66	2×300	Illumina MiSeq	Unavailable	CH1	IGHG
SRR10102139	Female	PBMC	RACE	Healthy	74	2×300	Illumina MiSeq	Unavailable	CH1	IGHG
SRR10102140	Male	PBMC	RACE	Healthy	48	2×300	Illumina MiSeq	Unavailable	CH1	IGHG
SRR10102141	Female	PBMC	RACE	Healthy	77	2×300	Illumina MiSeq	Unavailable	CH1	IGHG
SRR10102142	Female	PBMC	RACE	Healthy	64	2×300	Illumina MiSeq	Unavailable	CH1	IGHG
SRR10102143	Female	PBMC	RACE	Healthy	60	2×300	Illumina MiSeq	Unavailable	CH1	IGHG
SRR10102145	Female	PBMC	RACE	Healthy	69	2×300	Illumina MiSeq	Unavailable	CH1	IGHG
SRR10102146	Male	PBMC	RACE	HBV	41	2×300	Illumina MiSeq	Unavailable	CH1	IGHG
SRR10102147	Male	PBMC	RACE	Healthy	58	2×300	Illumina MiSeq	Unavailable	CH1	IGHG
SRR10102148	Female	PBMC	RACE	Healthy	51	2×300	Illumina MiSeq	Unavailable	CH1	IGHG
SRR10102149	Female	PBMC	RACE	Healthy	62	2×300	Illumina MiSeq	Unavailable	CH1	IGHG
SRR10102150	Male	PBMC	RACE	Healthy	48	2×300	Illumina MiSeq	Unavailable	CH1	IGHG
SRR10102151	Female	PBMC	RACE	Healthy	57	2×300	Illumina MiSeq	Unavailable	CH1	IGHG
SRR10102152	Female	PBMC	RACE	Healthy	43	2×300	Illumina MiSeq	Unavailable	CH1	IGHG
SRR10102153	Female	PBMC	RACE	Healthy	46	2×300	Illumina MiSeq	Unavailable	CH1	IGHG
SRR10102154	Female	PBMC	RACE	Healthy	46	2×300	Illumina MiSeq	Unavailable	CH1	IGHG
SRR10102155	Female	PBMC	RACE	Healthy	6	2×300	Illumina MiSeq	Unavailable	CH1	IGHG
SRR10102156	Male	PBMC	RACE	Healthy	67	2×300	Illumina MiSeq	Unavailable	CH1	IGHG
SRR10102158	Female	PBMC	RACE	Healthy	53	2×300	Illumina MiSeq	Unavailable	CH1	IGHG
SRR10102159	Female	PBMC	RACE	Healthy	53	2×300	Illumina MiSeq	Unavailable	CH1	IGHG
SRR10102160	Male	PBMC	RACE	Healthy	5	2×300	Illumina MiSeq	Unavailable	CH1	IGHG
SRR10102161	Female	PBMC	RACE	Healthy	5	2×300	Illumina MiSeq	Unavailable	CH1	IGHG
[truncated: 451 more rows]
